# Supplementary material for: Downregulation of LOC441461 Promotes Cell Growth and Motility in Human Gastric Cancer
Source: MDPI journal article supplement (doi:10.3390/cancers14051149), 2022-02-23
Supplement: s1 [file s1]

**Table S1.** siRNA sequences and target RNA

| siRNA            | Sequence                                                      | Target RNA | Reference                           |
|------------------|---------------------------------------------------------------|------------|-------------------------------------|
| si-LOC441461_318 | 5'-GGAACUGAAAUGUUGCCUUTT-3',<br>5'-AAGGCAACAUUUCAGUUCCTT-3'   | STX17-AS1  | J.-H. Wang et al.<br>Cancers (2020) |
| si-LOC441461_384 | 5'-GAUGGACUCACUAAAGGAUTT-3',<br>5'-AUCCUUUAGUGAGUCCAUCTT-3'   | STX17-AS1  | J.-H. Wang et al.<br>Cancers (2020) |
| si-LOC441461_432 | 5'-GCUGCUACAUUAAACUGAUUTT-3',<br>5'-AAUCAGUUA AUGUAGCAGCTT-3' | STX17-AS1  | J.-H. Wang et al.<br>Cancers (2020) |

**Table S2.** Primer set used in qRT-PCR targeting LOC441461, TRAIL, Cyclin D1, IRF1, U6, and GAPDH.

| Gene             | Forward Primer            | Reverse Primer          |
|------------------|---------------------------|-------------------------|
| <i>LOC441461</i> | TGATAAGCTGTTTAAACCAGAACCG | GGCAACATTTCAGTTCAGTG    |
| <i>TRAIL</i>     | TGGCAACTCCGTCAGCTCGTTA    | AGCTGCTACTCTCTGAGGACCT  |
| <i>Cyclin D1</i> | TCTACACCGACAACCTCCATCCG   | TCTGGCATTTCGGAGAGGAAGTG |
| <i>IRF1</i>      | GAGGAGGTGAAAGACCAGAGCA    | TAGCATCTCGGCTGGACTTCGA  |
| <i>U6</i>        | GGAACGATACAGAGAAGATTAGCA  | GTGCAGGGTCCGAGGT        |
| <i>GAPDH</i>     | GTCTCCTCTGACTTCAACAGCG    | ACCACCCTGTTGCTGTAGCCAA  |
