# Supplementary material for: Downregulation of LOC441461 Promotes Cell Growth and Motility in Human Gastric Cancer
Source: Cancers (Basel). 2022 Feb 23;14(5):1149. doi: 10.3390/cancers14051149 (PMC8909665; doi:10.3390/cancers14051149)
Supplement: Supplementary file 1 [file cancers-14-01149-s001.zip]

Archive with 15 entries (15 files):
- Figure S1.png
- Figure S2.png
- Figure S3.png
- Figure S4.png
- Figure S5.png
- Supplementary materials legends_revised.pdf
- Table S1 & S2.pdf
- Table S10.xlsx
- Table S3.csv
- Table S4.csv
- Table S5.xlsx
- Table S6.csv
- Table S7.xlsx
- Table S8.csv
- Table S9.xlsx
