# Supplementary material for: Downregulation of LOC441461 Promotes Cell Growth and Motility in Human Gastric Cancer
Source: Cancers (Basel). 2022 Feb 23;14(5):1149. doi: 10.3390/cancers14051149 (PMC8909665; doi:10.3390/cancers14051149)
Supplement: Supplementary file 1 [file cancers-14-01149-s001.zip › Table S3.csv]

Table S3. The results of IG analysis using TCGA STAD RNA-seq data and TNM stage information from clinical data between stage I and IV.
Gene	IG
CERS1	0.192792239
BC036441	0.189603021
RAI2	0.189134638
STK38L	0.170942669
CITED2	0.17084287
DEGS2	0.168598316
SLC16A10	0.163673349
CALM3	0.161116205
TMC8	0.154557308
ETNK2	0.152584161
ARC	0.143199772
KCTD9	0.140814548
HDAC1	0.135159829
ALDH1L1	0.135159829
ORAI2	0.135159829
TPSB2	0.13374206
ZNF467	0.13271676
TREML2	0.130952825
HDC	0.130788317
FNDC5	0.129085139
DLGAP3	0.126736395
BC045656	0.126736395
MANSC1	0.126736395
RBP5	0.126736395
TPSAB1	0.126224485
LOC441461	0.122339156
SIGLEC6	0.12154163
NHLRC4	0.12154163
AK097446	0.120547711
STK39	0.120547711
CATSPER1	0.120547711
GMCL1P1	0.120541585
PRKAR2B	0.119822948
WDR17	0.119822948
SLC29A4	0.118493923
NAT14	0.118493923
MYO16	0.118493923
TMEM63C	0.118493923
BC062769	0.118493923
GPM6A	0.118493923
CLDN11	0.118493923
NOV	0.115072566
LHX6	0.115024383
CXorf30	0.11398688
LOC728978	0.112554503
BHLHE22	0.112249554
CPA3	0.111729908
ABCB1	0.111429448
NECAB1	0.110807885
FAIM3	0.110424504
EMB	0.110424504
FCRLB	0.110424504
ABCB4	0.110424504
ASTL	0.110424504
PDZRN3	0.110424504
ZNF503-AS2	0.110424504
FUT2	0.110424504
SIGLEC17P	0.110424504
PCDH9	0.110424504
CCDC141	0.110424504
LOC100131825	0.110424504
BX647792	0.108374914
TCEAL5	0.107235814
KCNS3	0.106665456
APOD	0.106665456
FLNC	0.106665456
NPTX1	0.106665456
WIPF3	0.106665456
MAP1LC3B2	0.106650126
EN1	0.106650126
AF161442	0.105659892
TDO2	0.105659892
CARD11	0.104952388
CXorf69	0.104425453
SPON1	0.104425453
CR2	0.104425453
LOC100507421	0.104182371
LUM	0.104182371
CHGB	0.104182371
FGF7	0.104182371
AK131325	0.103567095
GALNTL1	0.103310104
KCNJ18	0.103310104
TYRP1	0.103310104
FBXO27	0.103310104
UNC5A	0.102520757
HSD11B1	0.102520757
CDCA2	0.102520757
ISLR	0.102520757
CNR1	0.102520757
CDH11	0.102520757
PBK	0.102520757
C1orf133	0.102520757
SOGA3	0.102520757
PRCD	0.102520757
AB074188	0.102520757
KIAA0408	0.102520757
FLJ39051	0.102520757
GABRA4	0.102520757
AIF1L	0.102520757
PPP1R1A	0.102520757
IER3	0.102520757
ACHE	0.102520757
HDX	0.102520757
L1CAM	0.102520757
HTRA3	0.102520757
GNGT1	0.102520757
BC089413	0.10211197
TCEAL7	0.102105042
C8orf4	0.101836929
NECAB2	0.101836929
LOC100507043	0.101836929
MS4A2	0.101610668
C1QTNF2	0.101312719
FAM160B2	0.100651453
LOC100127983	0.098613988
CADM2	0.098613988
ACVRL1	0.098487166
IGFBP5	0.098487166
CD22	0.098337156
MIR4784	0.097387505
SNAPC3	0.09676886
SEC14L4	0.09676886
GSC	0.09676886
LRRN2	0.09652838
NRG2	0.09652838
BMPR1B	0.09652838
ZCCHC24	0.096343953
TMEM182	0.096343953
PGM5	0.096343953
PLS1	0.096343953
PRELP	0.096343953
TMEM59L	0.096343953
HRASLS5	0.096343953
HOXA4	0.096338973
ISL2	0.096338973
KIF1A	0.096338973
VLDLR	0.096338973
EFNA5	0.096338973
CFL2	0.096338973
LOC255167	0.095763627
NR2F1	0.095763627
EPC1	0.095763627
POMC	0.095763627
DARC	0.095455886
RBPMS2	0.095455886
GLIS1	0.095455886
RET	0.095455886
PLCH1	0.095455886
TMEM176B	0.095455886
ASB4	0.095455886
GRID1	0.095455886
GRHL2	0.095416573
C2orf89	0.094775777
QPCT	0.094775777
WDR13	0.094775777
PFN2	0.094775777
NLGN4X	0.094775777
LOC386758	0.094775777
KIAA1324	0.094775777
C1orf198	0.094775777
CMPK1	0.094775777
VCAM1	0.094775777
RARRES2	0.094775777
CCR10	0.094775777
MAP2K6	0.094775777
REPIN1	0.094775777
ERN2	0.094775777
KREMEN1	0.094775777
MGC70870	0.094775777
GGT5	0.094775777
FAM71E1	0.094775777
NAT8L	0.094775777
ESCO2	0.094775777
BC047644	0.093724606
PTPLB	0.093724606
PTPRU	0.093724606
PRR14L	0.093724606
VTRNA1-3	0.093724606
LYL1	0.09304551
CCL2	0.09304551
PHACTR3	0.092931644
CASP6	0.092931644
LAMP5	0.092931644
AJ606316	0.092931644
LOC100507392	0.092596336
SNORD1A	0.091901723
NXNL2	0.091215426
CALB2	0.090859167
PAR5	0.090859167
RBP1	0.090859167
CDKN1A	0.090859167
MEIS3P1	0.090859167
DIRAS1	0.090859167
HBT8	0.090859167
PCBP1	0.090859167
NLRP9	0.090193402
FEM1C	0.090193402
SH3GL2	0.090193402
CMA1	0.090193402
FCRLA	0.090062449
PPY	0.090062449
PPP6R2	0.090062449
FAM176B	0.090062449
LDB2	0.090062449
CD163L1	0.089011129
NTRK1	0.089011129
NKX2-3	0.089011129
CADM3	0.089011129
GLT8D2	0.08871328
SCUBE3	0.08871328
SNCAIP	0.08871328
PEBP4	0.08871328
PRR15L	0.08871328
KIF26A	0.08871328
PLSCR4	0.08871328
PRODH	0.08871328
SNX7	0.08871328
FREM2	0.08871328
GSTM5	0.08871328
CBS	0.08871328
CPNE5	0.08871328
ARHGAP4	0.08871328
BARHL1	0.08871328
GATA5	0.08871328
ADRB2	0.08871328
PRPH	0.088591171
KLF8	0.088591171
LOC550643	0.088591171
FAM181B	0.088591171
NRXN2	0.088591171
CD300LB	0.088591171
C16orf45	0.088591171
CMAHP	0.088591171
MFSD9	0.088591171
LOC729059	0.088509306
CTSG	0.088509306
SYNPO2	0.088509306
PRRX2	0.088509306
TNS1	0.088509306
PAQR5	0.088426124
ELP3	0.088126019
chromosome_10_open_reading_frame_139	0.088126019
ICAM2	0.088126019
C11orf70	0.088126019
TUBB6	0.088126019
VSTM2L	0.088126019
CRLF2	0.088126019
ADRA2C	0.087922714
FADS3	0.087922714
CHST14	0.087922714
TCEA2	0.087922714
BC014575	0.087922714
MGC15885	0.087922714
FRMPD3	0.087922714
PVALB	0.087922714
AK055370	0.087922714
DPP10	0.087922714
BC038541	0.087922714
TMEM35	0.087859162
SLC4A3	0.087859162
IL33	0.087859162
PCBP3	0.087859162
LOC100505795	0.087859162
CHMP4C	0.087183095
PLAC9	0.087183095
RLTPR	0.087183095
DMRTA1	0.087183095
LRRC10B	0.087183095
ZNF141	0.087183095
CBX6	0.087183095
CDKN1C	0.087183095
LOC387723	0.087183095
RIMS1	0.087183095
AK027257	0.087183095
PRR5L	0.087183095
MIR335	0.087183095
CLCNKA	0.087183095
PPP1R32	0.087183095
ADAM22	0.087183095
BTBD10	0.087183095
RAVER2	0.087183095
ABCA9	0.087183095
MB21D2	0.087183095
NOVA1	0.087183095
IDUA	0.087183095
SMO	0.087183095
GLIS2	0.087183095
BC141952	0.087183095
TGFBI	0.087183095
SNAP25	0.087183095
RSPO3	0.087183095
MCM4	0.087183095
EEFSEC	0.087183095
BC033961	0.087183095
RHOU	0.087183095
ADCK5	0.087183095
C10orf116	0.087183095
KIRREL3	0.087183095
ENPP5	0.087183095
EDA	0.087183095
ARHGDIB	0.087183095
DTX2	0.087183095
PGP	0.087183095
SNORD74	0.087183095
AK130329	0.087183095
THBS4	0.087183095
GCK	0.087183095
STMN2	0.087183095
ZNF527	0.087183095
SLC7A10	0.087183095
EEF1A2	0.085042587
LOC613037	0.085042587
LOC100505817	0.085042587
ZBTB7B	0.081300338
ACTR3C	0.081300338
SLC25A37	0.081300338
PFN3	0.081300338
MAGEE1	0.081300338
GSS	0.081300338
CNPY4	0.081300338
ALDH1L2	0.081300338
ONECUT3	0.081300338
FADS1	0.081300338
CYGB	0.081300338
DTNA	0.081300338
MTA3	0.081300338
RPS6KA2	0.081300338
TPTEP1	0.081300338
FLJ35024	0.081300338
RYR2	0.081300338
GDF11	0.081300338
GTF2E2	0.081300338
AK124578	0.081300338
PCSK1N	0.081300338
GATA2	0.081300338
LAMA2	0.081300338
LINC00086	0.081300338
ANO5	0.081300338
USP6NL	0.081098893
HEATR5B	0.081098893
KCNK7	0.081098893
ACTR1B	0.081098893
DKFZp451A185	0.081098893
LINC00592	0.081098893
HPS4	0.081098893
GSDMA	0.079736642
PTPN13	0.079736642
ZNF300	0.079736642
AB231724	0.079736642
U2AF1L4	0.079736642
CDC42EP3	0.079736642
MIR4263	0.079736642
HAR1B	0.079736642
INMT	0.079736642
GPC6	0.079736642
NFYA	0.079736642
DCN	0.079736642
GAMT	0.079736642
HNRNPAB	0.079736642
ZNF826P	0.079736642
DNLZ	0.079736642
C1S	0.079736642
BC096759	0.079736642
PABPC5	0.079736642
TNR	0.079736642
CCL21	0.079736642
MTERFD3	0.079736642
LOC643529	0.079736642
HS3ST4	0.079736642
PEG10	0.079736642
MUC5AC	0.079736642
DNAJC25	0.079736642
C9orf86	0.079736642
KCNH2	0.079736642
SDSL	0.079736642
IL32	0.079736642
R3HDM1	0.079736642
HOXB6	0.079736642
ST8SIA1	0.079736642
LRRN4CL	0.079736642
DQ596274	0.079736642
HMGN2	0.079736642
MIR3909	0.079736642
SDF2	0.079736642
KCNJ2-AS1	0.079736642
FBLN1	0.079736642
DKFZp686N1631	0.079736642
NRN1	0.079736642
SULT1A1	0.079736642
AK311660	0.079736642
MUC6	0.079736642
PPARGC1B	0.079736642
AX748237	0.079736642
RNF212	0.079736642
LURAP1L	0.079736642
MSC	0.079736642
MIR4499	0.079736642
CHST12	0.079736642
LPPR4	0.079736642
AL157440	0.079736642
SERTAD4	0.079736642
ERI3	0.079736642
DQ590038	0.079736642
HAPLN4	0.079736642
RUNX2	0.079736642
SLC12A9	0.079736642
VPS53	0.079736642
EMR2	0.079736642
LAMTOR3	0.079736642
PELI2	0.079736642
GCA	0.079736642
RPL28	0.079736642
BC005081	0.079736642
AF085995	0
MTVR2	0
ATRX	0
DQ589460	0
DQ597117	0
LOC147670	0
LOC100506866	0
LOC441204	0
TCOF1	0
NSRP1	0
SPPL3	0
OPA3	0
OPA1	0
ITGA8	0
ITGA9	0
ITGA1	0
ITGA2	0
ITGA3	0
ITGA4	0
ITGA5	0
ITGA6	0
ITGA7	0
TRHR	0
UFSP1	0
UFSP2	0
AK057396	0
FAM212B	0
FAM212A	0
CHST9	0
CHST8	0
CHST1	0
CHST3	0
CHST2	0
CHST5	0
CHST4	0
CHST7	0
CHST6	0
ITGAX	0
BCL2A1	0
ITGAV	0
ITGAL	0
ITGAM	0
BC044741	0
ITGAD	0
ITGAE	0
DQ595407	0
DQ595400	0
AX746504	0
BC006435	0
IGF2R	0
SLC36A4	0
SLC36A3	0
CKS1B	0
SLC36A1	0
LOC729264	0
AK094188	0
DQ571524	0
C14orf118	0
ARTN	0
ART1	0
ART3	0
ART5	0
ART4	0
DQ575060	0
DQ575062	0
RNase_MRP	0
CRTAM	0
CADPS2	0
DQ573965	0
RLF	0
DQ573962	0
CRTAP	0
BC078172	0
AK097193	0
AK097190	0
ADPGK	0
HPYR1	0
CPEB4	0
CPEB1	0
CPEB3	0
CPEB2	0
SRBD1	0
ABAT	0
POU5F1B	0
LOC284865	0
PHOX2A	0
PHOX2B	0
NLRP14	0
UPK2	0
CFH	0
CFI	0
ANKFY1	0
CFB	0
TPT1-AS1	0
AL832737	0
CFP	0
REREP3	0
AAAS	0
SIDT1	0
SIDT2	0
DQ573033	0
PISRT1	0
MascRNA_menRNA	0
LOC283070	0
DQ576602	0
SAGE1	0
DQ586142	0
AAGAB	0
C4orf19	0
SLC7A6OS	0
C4orf17	0
CDH26	0
ECEL1	0
AB240015	0
EFHA1	0
DQ570601	0
EFHA2	0
BC034605	0
TERT	0
AX746887	0
AX746880	0
ETV3L	0
GCFC1-AS1	0
MSL3P1	0
BC033554	0
C15orf26	0
C15orf27	0
C15orf24	0
C15orf23	0
C15orf29	0
ZNF117	0
ZNF114	0
SEZ6L	0
PRKAR2A	0
S1PR5	0
TMEM200B	0
ITGA2B	0
PHACTR4	0
NLGN2	0
OR2K2	0
NUP107	0
KRTAP2-3	0
KRTAP2-2	0
KRTAP2-1	0
KRTAP2-4	0
AX747372	0
MIR4708	0
AX747377	0
AX747376	0
AX747379	0
MIR4705	0
MIR4706	0
MIR4701	0
MIR4703	0
DQ585554	0
DQ585551	0
SBF1P1	0
VMP1	0
DQ587955	0
DQ587954	0
DQ587956	0
NR1D1	0
NR1D2	0
OGFR	0
LOC151121	0
RP11-165H20.1	0
PTCH2	0
PTCH1	0
TIMM44	0
RAD9B	0
RAD9A	0
ERGIC2	0
ERGIC3	0
ERGIC1	0
MIR3165	0
MIR3167	0
MIR3162	0
B3GAT3	0
B3GAT2	0
B3GAT1	0
MIR3169	0
CALM2	0
SPG21	0
SPG20	0
GSDMB	0
GSDMC	0
GSDMD	0
UPK1A	0
UPK1B	0
DLGAP2	0
DLGAP1	0
DLGAP4	0
DLGAP5	0
FBXL14	0
OIP5	0
FAM169A	0
MIR506	0
PTPN18	0
MIR505	0
PTPN12	0
PTPN11	0
PTPN14	0
LYAR	0
Mir_154	0
C2orf81	0
C2orf80	0
DMRTB1	0
C2orf82	0
C2orf84	0
SNORA84	0
C2orf88	0
TRAPPC6A	0
MZB1	0
TRAPPC6B	0
HLA-DQB1	0
MSMB	0
BC139719	0
LOC100129027	0
CDK4	0
CDK6	0
CDK7	0
FOXS1	0
CDK9	0
LOC643733	0
ZFP161	0
LPAR6	0
CAMKK2	0
CAMKK1	0
HMGB3P1	0
LOC84856	0
LOC100128640	0
RPL36AL	0
CHMP7	0
CHMP6	0
CHMP5	0
OR52N4	0
OR52N5	0
OR52N2	0
OR52N1	0
LY6G6C	0
HOXA13	0
LY6G6E	0
LY6G6F	0
HOXA10	0
GALNTL5	0
GALNTL4	0
GALNTL6	0
GALNTL2	0
LOC100506462	0
TDH	0
KRTAP11-1	0
TDG	0
HN1	0
BC104003	0
DD431424	0
GOLGA8IP	0
LRRC27	0
LRRC26	0
LRRC25	0
LRRC24	0
KIAA1522	0
MPDU1	0
LRRC20	0
LRRC29	0
LRRC28	0
GCNT4	0
GCNT7	0
GCNT1	0
GCNT3	0
GCNT2	0
LPCAT4	0
LPCAT2	0
LPCAT3	0
LPCAT1	0
TAGLN	0
ALPP	0
CCDC170	0
CCDC171	0
PDK1	0
PDK3	0
PDK2	0
EBP	0
PDK4	0
LNPEP	0
ALPI	0
SEC61A1	0
SEC61A2	0
ALPL	0
PECR	0
MIR193A	0
MIR193B	0
HAS2-AS1	0
LOC400620	0
LOC100507412	0
LOC100507410	0
CTAGE11P	0
D21S2088E	0
DDIT3	0
DDIT4	0
RIIAD1	0
OR5R1	0
GOLGA8E	0
GOLGA8F	0
GOLGA8A	0
GOLGA8C	0
GOLGA8B	0
CT45A1	0
PTPMT1	0
CT45A2	0
CT45A5	0
CT45A4	0
CT45A6	0
VMO1	0
ATP5C1	0
MIR638	0
MIR635	0
MIR634	0
MIR636	0
MIR631	0
MIR630	0
LINC00320	0
NPC2	0
NPC1	0
LINC00323	0
LINC00324	0
LINC00326	0
LINC00327	0
C3orf58	0
RAB3GAP2	0
BHLHA15	0
RAB3GAP1	0
C3orf51	0
C3orf52	0
C3orf55	0
C3orf56	0
DAG1	0
ETHE1	0
AL357213	0
AK056490	0
KDM1A	0
KDM1B	0
LOC649395	0
SLC36A2	0
OR1S1	0
OR1S2	0
MIR2355	0
AX748125	0
DQ592682	0
FCER1G	0
BTG4	0
FCER1A	0
BTG2	0
BTG1	0
DQ592688	0
JA611274	0
JA611275	0
JA611272	0
JA611273	0
SRD5A3	0
SRD5A2	0
SRD5A1	0
JA611279	0
GGA1	0
GGA3	0
GGA2	0
FHOD1	0
FHOD3	0
MIR545	0
C4orf6	0
DQ600292	0
GJC2	0
C4orf3	0
GJC1	0
PSMB9	0
PSMB8	0
STAMBPL1	0
PSMB6	0
PSMB5	0
PSMB4	0
PSMB3	0
PSMB2	0
DQ593480	0
LMBR1L	0
PNMA1	0
AX747577	0
TDGF1	0
AX747578	0
DQ574810	0
LOC285103	0
PNMA2	0
PNMA5	0
LTN1	0
TRIML2	0
C9orf142	0
TRIML1	0
NACC2	0
VPS13D	0
NACC1	0
VPS13A	0
SH3KBP1	0
VPS13C	0
VPS13B	0
BEX5	0
BEX4	0
BEX2	0
BEX1	0
TMEM160	0
TMEM163	0
TMEM165	0
TMEM164	0
DQ571282	0
FOXN4	0
TMEM168	0
EVI2B	0
FOXN1	0
FOXN2	0
FOXN3	0
NICN1	0
DQ572955	0
MEG3_1	0
DQ570882	0
IFFO1	0
IFFO2	0
DQ571750	0
DQ574505	0
SNAP91	0
C11orf35	0
C11orf34	0
C11orf36	0
C11orf31	0
C11orf30	0
LOC284276	0
GABRA3	0
IFNA6	0
MACROD2	0
MACROD1	0
BC041900	0
15-Sep	0
M1	0
FAM64A	0
LOC100130015	0
FAM92A1	0
UGT2A1	0
C8orf49	0
C8orf48	0
C8orf47	0
C8orf46	0
C8orf44	0
C8orf42	0
TP53I3	0
C8orf40	0
AK097787	0
MB	0
BC035052	0
DQ587429	0
DUX4L4	0
DUX4L3	0
SLC18A3	0
SLC18A2	0
SLC18A1	0
BC049825	0
RALBP1	0
DQ572382	0
ZNF831	0
ZNF830	0
ZNF835	0
DJ417906	0
ZNF837	0
ZNF836	0
ZNF839	0
LRIF1	0
AK090788	0
PHAX	0
DQ581863	0
DQ581862	0
MLK7-AS1	0
DQ586485	0
TSPY8	0
MIR4773-2	0
MIR4773-1	0
SBSPON	0
ZPBP	0
TSPY2	0
TSPY1	0
SLC17A8	0
SLC17A9	0
RAB33B	0
SLC17A4	0
BC048192	0
SLC17A6	0
SLC17A7	0
SLC17A1	0
SLC17A2	0
SLC17A3	0
C16orf58	0
C16orf59	0
C16orf52	0
C16orf53	0
C16orf57	0
C16orf54	0
C16orf55	0
ITCH	0
CHMP4B	0
DQ581281	0
COBLL1	0
ST5	0
ST7	0
TMEM173	0
STL	0
ZNF304	0
STH	0
ZNF302	0
MIR4534	0
STS	0
LOC100505839	0
HOXB13	0
IFT80	0
BC033456	0
MIR4530	0
PPP3CA	0
PPP3CB	0
PPP3CC	0
LIF	0
RPL12	0
RPL13	0
NCF1	0
NPY6R	0
DQ584505	0
RPL18	0
ADRA2A	0
ADRA2B	0
TEX26	0
TEX22	0
TEX28	0
TEX29	0
AL360260	0
SYT8	0
SYT9	0
MTCH2	0
MTCH1	0
SYT1	0
SYT2	0
SYT3	0
SYT4	0
SYT5	0
SYT6	0
SYT7	0
TIAL1	0
IGKV1-12	0
FUBP3	0
FUBP1	0
CTBP1-AS1	0
MARCO	0
SAP30	0
DQ587855	0
NBL1	0
HSFX2	0
BC032415	0
HSFX1	0
C1orf53	0
C1orf52	0
C1orf51	0
C1orf50	0
C1orf56	0
C1orf55	0
C1orf54	0
01-Mar	0
02-Mar	0
LOC100128023	0
SMPD4	0
SMPD1	0
SMPD3	0
SMPD2	0
BRIP1	0
PDE11A	0
DQ583395	0
DQ582622	0
TTC28	0
AK125960	0
DQ589635	0
TTC24	0
TTC25	0
TTC26	0
TTC27	0
PATL2	0
TTC22	0
PATL1	0
ENO1	0
ENO2	0
ENO3	0
ENO4	0
BC016656	0
DQ592442	0
OIP5-AS1	0
LOC728613	0
CBX3P2	0
CFD	0
OBSCN	0
MCL1	0
SORBS1	0
SORBS3	0
SORBS2	0
ODC1	0
IL18RAP	0
EOMES	0
MIR873	0
MIR877	0
MIR876	0
MIR875	0
MIR874	0
CGB1	0
PDSS1	0
Mir_720	0
JN120858	0
DAZ2	0
FBXO18	0
FKBP15	0
UBE2J1	0
UBE2J2	0
FKBP11	0
FBXO10	0
FBXO11	0
FBXO16	0
TACO1	0
FBXO15	0
SFTA3	0
SFTA2	0
SNORD48	0
CNGB1	0
SNORD90	0
SNORD41	0
SNORD46	0
SNORD45	0
SNORD44	0
PLA2G6	0
PLA2G7	0
PLA2G5	0
PLA2G3	0
GDPGP1	0
CCDC76	0
CCDC77	0
KRTAP1-3	0
CCDC72	0
KRTAP1-5	0
CCDC70	0
CCDC71	0
CCDC78	0
CCDC79	0
HIST3H2BB	0
SNORD4B	0
SNORD4A	0
GHITM	0
LOC100127888	0
CNTLN	0
LOC100506585	0
DQ575612	0
CSHL1	0
FKBP1B	0
FKBP1A	0
DQ600930	0
DL490307	0
DQ578199	0
LGALS9C	0
LGALS9B	0
UNC50	0
NKAIN4	0
NKAIN3	0
NKAIN2	0
NKAIN1	0
BC100777	0
MAP1A	0
MAP1B	0
IGSF9B	0
UNC5B	0
UNC5C	0
VGF	0
UNC5D	0
MAP1S	0
CCP110	0
AK125516	0
ANKRD19P	0
RPL18A	0
CLEC18A	0
CEND1	0
CLEC18B	0
MFSD11	0
MGC23284	0
SDR42E1	0
ALOX12B	0
AB231722	0
AB231723	0
EPB41L3	0
AB231721	0
EPB41L5	0
ACSS3	0
ACSS2	0
ACSS1	0
KIDINS220	0
PCOLCE2	0
DFNA5	0
SnoU13	0
WNT3	0
WNT2	0
WNT1	0
LRRN4	0
AGXT	0
LRRN1	0
WNT4	0
LOC90499	0
BC031235	0
BC031238	0
BC031239	0
BC039537	0
HOXA11-AS	0
RNF175	0
RNF170	0
ASAP1-IT1	0
DQ588286	0
PCNA	0
ZBTB7A	0
DQ577988	0
ZBTB7C	0
P712P	0
PCNP	0
PCNT	0
PCNX	0
UTY	0
LOC442497	0
OR8I2	0
PCAT1	0
PACRG	0
MIR409	0
UFD1L	0
ILF3	0
ILF2	0
LOC100271722	0
BOK	0
BOC	0
AK057887	0
DENND2C	0
DENND2A	0
MIR1-1	0
DENND2D	0
AK131521	0
GAGE1	0
PPT1	0
RABAC1	0
INPP4B	0
INPP4A	0
DQ597539	0
SAFB	0
TRNP1	0
BC034319	0
DQ595026	0
PPP1R26	0
PPP1R27	0
PPP1R21	0
NGLY1	0
LOC100288615	0
BC110060	0
FAS-AS1	0
LMX1A	0
LMX1B	0
OR6V1	0
ABCE1	0
AK294004	0
BC041007	0
DQ585921	0
BC041003	0
abParts	0
DQ579248	0
GBX2	0
GBX1	0
CNR2	0
GNL3L	0
DQ579247	0
DQ575559	0
LOC606724	0
DQ584669	0
DQ573895	0
TGS1	0
ANKS1B	0
AB007962	0
ANKS1A	0
BC039000	0
BC036308	0
MIR1972-1	0
ADAM10	0
ADAM11	0
ADAM12	0
ADAM15	0
LOC100289255	0
ADAM17	0
ADAM18	0
ADAM19	0
DQ583809	0
LOC730227	0
MEPE	0
HAGH	0
BC036209	0
GLYAT	0
OPALIN	0
NDEL1	0
SHANK3	0
SHANK2	0
SHANK1	0
HUS1	0
PLAC8L1	0
PCSK9	0
PCSK2	0
PCSK1	0
PCSK6	0
PCSK7	0
PCSK4	0
PCSK5	0
MAEA	0
BC070396	0
BC070391	0
DQ582866	0
DQ586526	0
TC2N	0
LOC63930	0
PLTP	0
C11orf1	0
SETBP1	0
SAMSN1	0
LOC100287482	0
FAM151B	0
FAM151A	0
SNORD91B	0
SNORD91A	0
PAXIP1	0
VPRBP	0
RPL13AP6	0
RPL13AP3	0
USE1	0
DQ590318	0
CNRIP1	0
BC053580	0
ARMCX5-GPRASP2	0
DQ580168	0
CYP1B1-AS1	0
CDC34	0
CDC37	0
LOC340037	0
OR2T34	0
OR2T35	0
OR2T33	0
DQ571055	0
AK021664	0
SPIN2B	0
PGLS	0
OXR1	0
UNKL	0
CCDC42B	0
DIAPH2	0
CCNA1	0
DYNC1I1	0
VPS28	0
DYNC1I2	0
TAS2R50	0
SKA3	0
SKA2	0
GRID2IP	0
PCDH20	0
FAM116A	0
BC028022	0
C6orf89	0
PPP1R13B	0
PPP1R13L	0
BC027906	0
DQ582474	0
TMC5	0
LOC100128239	0
JA374918	0
JA660803	0
WNT10A	0
WNT10B	0
MIR147A	0
HSP90B3P	0
DQ601664	0
MIR1470	0
AF086132	0
OR4A47	0
PYY	0
LPP-AS2	0
BC114339	0
AF508907	0
AF508906	0
MAGT1	0
DQ597730	0
SNORD115-6	0
DQ598506	0
POU3F1	0
AK057317	0
LAMB1	0
LAMB3	0
LAMB2	0
CYSLTR2	0
LAMB4	0
ATP7B	0
MPHOSPH9	0
MPHOSPH8	0
POU3F4	0
MPHOSPH6	0
MIR936	0
MIR937	0
ASTN1	0
RSPH9	0
MIR933	0
MIR938	0
MIR939	0
MGA	0
LOC729156	0
BC045767	0
SVEP1	0
MGP	0
ADSS	0
SAMD4A	0
ADSL	0
SAMD4B	0
LOC441426	0
GAS2L1	0
GAS2L3	0
GAS2L2	0
FAM53B	0
HPGDS	0
LOC646498	0
XRRA1	0
DL492607	0
HN1L	0
NDNF	0
ZW10	0
RSRC1	0
RSRC2	0
DQ591901	0
CPN2	0
CPN1	0
DQ575791	0
TP73-AS1	0
AK001582	0
PYY2	0
CDADC1	0
PHACTR1	0
NLGN3	0
ARHGAP44	0
ZNF733P	0
CASQ1	0
ARHGAP40	0
CASQ2	0
LOC100506776	0
PHACTR2	0
PCBP1-AS1	0
BC125159	0
DQ578013	0
DQ578010	0
TNNT1	0
AK001057	0
CDC42EP2	0
CDC42EP1	0
CDC42EP5	0
CDC42EP4	0
GPRC6A	0
TBKBP1	0
ABI2	0
ABI3	0
ABI1	0
TESC	0
OTP	0
AX747375	0
PITPNC1	0
KRT39	0
KRT38	0
KRT31	0
KRT32	0
KRT35	0
KRT34	0
KRT37	0
KRT36	0
IL21	0
IL20	0
IL22	0
IL25	0
IL24	0
IL27	0
IL26	0
IL29	0
DQ579654	0
BC034578	0
TIMP2	0
TIMP1	0
PARS2	0
BC036594	0
CLINT1	0
DMAP1	0
SLC22A7	0
AB209185	0
AHRR	0
LOC389023	0
AX746800	0
AX746803	0
ADCY4	0
ADCY5	0
ADCY6	0
ADCY7	0
ADCY1	0
ADCY2	0
LOC100130776	0
ADCY8	0
ADCY9	0
NUCKS1	0
AK094929	0
DDI2	0
DDI1	0
XRCC1	0
HOXB-AS3	0
XRCC3	0
XRCC2	0
XRCC5	0
XRCC4	0
XRCC6	0
SLC22A2	0
DQ577554	0
MEIS3	0
MEIS2	0
MEIS1	0
PCDHAC2	0
CTLA4	0
KIAA1199	0
ESPNL	0
USP32P1	0
USP32P2	0
ESPNP	0
AK097470	0
AK097472	0
AK056524	0
BX537783	0
BC035769	0
LOC100144604	0
LOC100144602	0
LOC100144603	0
CTSL3	0
CTSL2	0
AX747048	0
H2AFY2	0
LOC100129858	0
ADCY10	0
KCNA6	0
KCNA7	0
KCNA4	0
KCNA5	0
KCNA2	0
KCNA3	0
KCNA1	0
OPTN	0
BHMT	0
OPTC	0
FTL	0
FTO	0
ACACA	0
ACACB	0
TNK1	0
PLA2G2A	0
PLA2G2C	0
PLA2G2E	0
PLA2G2D	0
PLA2G2F	0
ZDHHC4	0
SLC22A9	0
DEM1	0
OR8J3	0
OR8J1	0
AATK-AS1	0
CYFIP1	0
CYFIP2	0
LOC151658	0
GUSBP5	0
GUSBP4	0
GUSBP1	0
GUSBP2	0
DL476313	0
LHPP	0
BC033330	0
NUP188	0
GLT8D1	0
LOC100216001	0
OR2C3	0
OR2C1	0
REG1A	0
REG1B	0
MRGPRD	0
OSR1	0
MRGPRF	0
MRGPRG	0
C1orf144	0
REG1P	0
TTC39B	0
AK095132	0
HES2	0
BPNT1	0
BCL9	0
BCL6	0
BCL3	0
BCL2	0
DD413549	0
NPEPL1	0
CLMN	0
CLMP	0
BC045779	0
DQ582272	0
MTM1	0
CSNK1G2	0
SERPINB8	0
MOSPD3	0
CSNK1G1	0
SERPINB1	0
SERPINB3	0
SERPINB2	0
SERPINB5	0
SERPINB7	0
SERPINB6	0
AK096279	0
FAM76A	0
EXD3	0
EXD2	0
EXD1	0
ELP4	0
ELP2	0
AK023178	0
SPRYD3	0
SPRYD4	0
SPRYD7	0
KLHDC4	0
KLHDC5	0
KLHDC2	0
KLHDC3	0
KLHDC1	0
TLR3	0
ASXL1	0
TRIM51	0
ASXL3	0
ASXL2	0
DDX6	0
HDDC2	0
HDDC3	0
ZNF252P-AS1	0
DQ576099	0
SPATA13	0
SPATA12	0
SPATA17	0
SPATA16	0
COL18A1-AS1	0
SPATA18	0
TLR8	0
VCP	0
CEP170P1	0
AK055459	0
BX641143	0
CPLX4	0
ZNF214	0
RINL	0
HFE	0
GPR144	0
GPR146	0
LOC154449	0
ZNF213	0
GPR142	0
GPR143	0
SLC7A9	0
GPR148	0
GPR149	0
HLA-C	0
ZWINT	0
CITED1	0
TRAK1	0
CITED4	0
DAGLA	0
DAGLB	0
PHF21A	0
SLC7A3	0
BC080605	0
SLC7A1	0
CSNK1A1L	0
HIRA	0
RIN1	0
RIN3	0
RIN2	0
WWOX	0
DQ590295	0
RIPK1	0
RIPK3	0
RIPK2	0
RIPK4	0
SRCIN1	0
LOC339666	0
TUBG1	0
C2orf27A	0
CRABP1	0
CRABP2	0
C2orf27B	0
C7orf73	0
C7orf72	0
C7orf71	0
ZNF419	0
ZNF418	0
ZNF417	0
ZNF416	0
ZNF415	0
ZNF414	0
ZNF410	0
GLIPR2	0
GLIPR1	0
SSSCA1	0
POU4F1	0
POU4F2	0
POU4F3	0
FBF1	0
RASA4	0
HM13	0
RASA2	0
RASA3	0
ACTN3	0
ACTN2	0
ACTN1	0
NGFRAP1	0
ACTN4	0
BC053935	0
EZR	0
BC030525	0
MIR4269	0
MIR4268	0
MIR4262	0
MIR4261	0
MIR4260	0
MIR4267	0
MIR4266	0
MIR4265	0
MIR4264	0
DQ585694	0
N6AMT1	0
N6AMT2	0
OR5J2	0
UBXN4	0
ABLIM1	0
ABLIM3	0
ABLIM2	0
UBXN6	0
FAM172A	0
DUSP6	0
DQ596925	0
BIVM-ERCC5	0
DQ596928	0
GSTZ1	0
AK055272	0
RAB6A	0
RAB6B	0
RAB6C	0
LOC100506368	0
DQ588677	0
DAOA	0
ERVV-1	0
ERVV-2	0
GDI2	0
GDI1	0
TCRBV15S1	0
TTC30A	0
TTC30B	0
TFAP4	0
CALM1	0
AK123263	0
DQ600788	0
DQ600787	0
NAPEPLD	0
SNORA24	0
SPTA1	0
HGSNAT	0
AK125858	0
DQ589785	0
AK302545	0
CRYZL1	0
SERF2	0
OR4L1	0
NAV2-AS4	0
NAT9	0
NAT8	0
NAT2	0
NAT1	0
DQ589253	0
FAIM2	0
CCBL1	0
CCBL2	0
COX5A	0
COX5B	0
AF086303	0
LOC401588	0
BC062794	0
CLCN2	0
SIPA1L1	0
SIPA1L3	0
SIPA1L2	0
LINC00246B	0
PPFIA4	0
DQ579071	0
SLC35F5	0
SLC35F4	0
SLC35F1	0
SLC35F3	0
SLC35F2	0
SUPV3L1	0
LMAN1L	0
TSPAN18	0
TSPAN19	0
TSPAN10	0
TSPAN11	0
TSPAN12	0
AX746627	0
TSPAN14	0
TSPAN15	0
TSPAN16	0
TSPAN17	0
MT-ND5	0
EAF1	0
EAF2	0
FOXF1	0
FOXF2	0
RBPJL	0
TMUB1	0
TMUB2	0
SCGB1C1	0
KIAA1644	0
SYNCRIP	0
AK094715	0
BC041459	0
MMAA	0
MMAB	0
BC041455	0
TYR	0
ALG8	0
PDXK	0
ALG2	0
ALG3	0
ALG1	0
ALG6	0
ALG5	0
WIF1	0
AK093940	0
RNGTT	0
KIAA1324L	0
INSL5	0
HAR1A	0
INSL6	0
GALR1	0
INSL3	0
RAB8B	0
RTN1	0
RAB8A	0
SNORD111B	0
BC043587	0
RDM1	0
BC043580	0
CLUL1	0
PDX1	0
AK095045	0
LOC100131320	0
DQ573170	0
AK090700	0
LOC388588	0
FECH	0
ADAP1	0
ADAP2	0
AL832163	0
KLHL10	0
KLHL11	0
KLHL12	0
KLHL13	0
KLHL14	0
KLHL15	0
KLHL17	0
KLHL18	0
BC048114	0
CR933660	0
BC048118	0
CR933665	0
LOC283624	0
C2orf83	0
SNORA81	0
C7orf61	0
GABPB2	0
IGIP	0
C7orf65	0
C7orf66	0
LOC100130987	0
SLN	0
SLK	0
CYB561D2	0
PHYH	0
NOTCH4	0
PHGR1	0
MEAF6	0
MSMP	0
AZIN1	0
NOTCH1	0
BC132896	0
NOTCH3	0
ZNF658	0
ZNF655	0
TCTEX1D2	0
TCTEX1D1	0
ZNF653	0
TCTEX1D4	0
N4BP2L1	0
RAPGEF5	0
RAPGEF6	0
N4BP2L2	0
RAPGEF1	0
RAPGEF2	0
RAPGEF3	0
BX647243	0
ZNF384	0
ZNF383	0
ZNF382	0
MIR4420	0
HLA-DQB2	0
KRTAP3-2	0
KRTAP3-3	0
KRTAP3-1	0
X97876	0
AX747238	0
SNRPD3	0
SNRPD2	0
SNRPD1	0
NMBR	0
RBM26-AS1	0
IFT43	0
IFT46	0
BC061642	0
NOP14-AS1	0
GLDN	0
GLDC	0
PC	0
DHRS11	0
DHRS12	0
DHRS13	0
GPR89B	0
GPR89C	0
GPR89A	0
LGMN	0
MIR3591	0
DQ584320	0
DQ584326	0
BC044611	0
BC044614	0
CAPS2	0
EHMT1	0
EHMT2	0
ADIPOR2	0
ADIPOR1	0
MARK4	0
STOX1	0
MARK1	0
MARK2	0
MARK3	0
IGBP1	0
TPD52L2	0
TPD52L3	0
TPD52L1	0
EFCAB11	0
EFCAB10	0
DQ586890	0
CAPSL	0
ACTR3B	0
WDR12	0
WDR11	0
WDR16	0
WDR19	0
WDR18	0
FAM204A	0
USP9X	0
USP9Y	0
KRT33B	0
KRT33A	0
ZFP41	0
ZFP42	0
LOC100129345	0
BC015383	0
MYADML2	0
PLOD3	0
LINC00204A	0
FKBP9L	0
LDLRAD1	0
LDLRAD2	0
LDLRAD3	0
HPCA	0
APEH	0
DEFB135	0
DEFB136	0
DEFB130	0
DEFB131	0
DEFB132	0
DEFB133	0
HH834010	0
DQ578267	0
NKX6-2	0
NKX6-3	0
NKX6-1	0
KCTD13	0
KCTD12	0
KCTD11	0
KCTD10	0
KCTD17	0
KCTD16	0
KRTAP10-9	0
KCTD14	0
KRTAP10-7	0
KRTAP10-6	0
KCTD19	0
KCTD18	0
KRTAP10-3	0
KRTAP10-2	0
KRTAP10-1	0
AK131516	0
MIR135B	0
H6PD	0
SLC25A35	0
SLC25A34	0
SLC25A36	0
SLC25A31	0
SLC25A30	0
SLC25A33	0
GPBAR1	0
SLC25A39	0
SLC25A38	0
LOC642236	0
TUBA1C	0
TUBA1B	0
TUBA1A	0
IGSF10	0
IGSF11	0
AK090895	0
FAM102B	0
FAM102A	0
RIMKLA	0
RIMKLB	0
PCID2	0
LOC100287314	0
DQ595055	0
POMT2	0
AIF1	0
AGPS	0
STOM	0
HOXA11	0
NPLOC4	0
TMEM86A	0
TMEM86B	0
LGALS13	0
LGALS12	0
LGALS16	0
LGALS14	0
LOC644172	0
DQ585153	0
FLJ31662	0
PBLD	0
DQ580504	0
PGPEP1	0
SMU1	0
OR13G1	0
SSRP1	0
IRAK1BP1	0
MIR770	0
LOC100506085	0
LOC100506083	0
C1orf174	0
C1orf177	0
AK125333	0
C1orf170	0
C1orf173	0
C1orf172	0
DQ588732	0
MIR483	0
AK055408	0
GPC3	0
MIR486	0
GPC5	0
MIR485	0
[truncated: 24,542 more rows]
