# Supplementary material for: Downregulation of LOC441461 Promotes Cell Growth and Motility in Human Gastric Cancer
Source: Cancers (Basel). 2022 Feb 23;14(5):1149. doi: 10.3390/cancers14051149 (PMC8909665; doi:10.3390/cancers14051149)
Supplement: Supplementary file 1 [file cancers-14-01149-s001.zip › Table S4.csv]

Table S4. Analysis of the expression of genes with IG >0 in TNM stages I and IV using t tests.
Gene	T-test p-value
NOV	9.17E-06
CARD11	1.98E-05
LOC441461	5.66E-05
ZNF467	7.69E-05
AK097446	9.30E-05
TPSAB1	0.0002408
LOC728978	0.0004556
EMB	0.0005744
TPSB2	0.0006275
KCTD9	0.0008547
ORAI2	0.000906
ARC	0.001372
STK39	0.001433
RBP5	0.001551
FCRLB	0.00172
BC045656	0.002399
TDO2	0.003339
MANSC1	0.007077
PRKAR2B	0.009697
FAIM3	0.01129
PLCH1	0.01261
CR2	0.01445
HDC	0.01808
RAI2	0.02118
TREML2	0.0229
NHLRC4	0.0248
BC062769	0.03032
TMC8	0.03247
MOB3B	0.03295
SIGLEC17P	0.04328
DLGAP3	0.04957
CITED2	0.05104
LHX6	0.05364
FUT2	0.05894
CASP6	0.06522
NAT14	0.07998
BHLHE22	0.08128
HDAC1	0.08739
WDR17	0.0882
CLDN11	0.09069
ALDH1L1	0.1333
DEGS2	0.134
CATSPER1	0.144
SLC29A4	0.1666
LOC100131825	0.1695
TMEM63C	0.2902
ETNK2	0.2906
ISL2	0.3287
NECAB2	0.3466
CALM3	0.348
MYO16	0.3827
PDZRN3	0.4136
CNR1	0.513
STK38L	0.6397
GPM6A	0.6576
CXorf30	0.6613
BC036441	0.6614
CERS1	0.9155
FNDC5	0.9707
