# Supplementary material for: Downregulation of LOC441461 Promotes Cell Growth and Motility in Human Gastric Cancer
Source: Cancers (Basel). 2022 Feb 23;14(5):1149. doi: 10.3390/cancers14051149 (PMC8909665; doi:10.3390/cancers14051149)
Supplement: Supplementary file 1 [file cancers-14-01149-s001.zip › Table S5.xlsx]

## Sheet: logrank
Table S5. The results of log-rank test.
Category	Comparison	Overall survival logrank test p-value	Progression free interval logrank test p-value
T3	M0 vs M1	0.7	0.8
T4	M0 vs M1	0.04	0.05
M0	T1 vs T4	0.01	0.04
	T2 vs T4	0.3	0.8
	T3 vs T4	0.9	0.1
M1	T3 vs T4	0.2	0.6
