# Supplementary material for: Downregulation of LOC441461 Promotes Cell Growth and Motility in Human Gastric Cancer
Source: Cancers (Basel). 2022 Feb 23;14(5):1149. doi: 10.3390/cancers14051149 (PMC8909665; doi:10.3390/cancers14051149)
Supplement: Supplementary file 1 [file cancers-14-01149-s001.zip › Table S6.csv]

Table S5. Differentially expressed genes between LOC441461 knockdown and N.C groups. KD is knockdown of LOC441461. N.C is negative controls
Gene	KD/N.C log2 fold change	KD/N.C raw p-value	KD/N.C Benjamini-Hochberg adjusted p-value
TGM2	-4.129936	4.33E-158	6.25E-154
RAD51L3-RFFL	-3.675364	0.000575632	0.006500593
GINS2	-3.508951	1.15E-105	3.33E-102
NDE1	-3.096603	1.89E-52	1.61E-49
NRIP3	-2.816896	4.64E-14	4.57E-12
VPS51	-2.795577	1.87E-54	1.93E-51
GPR75-ASB3	-2.645464	0.001292819	0.01206436
CALHM3	-2.551304	0.000227385	0.00307758
PCSK9	-2.54064	3.60E-10	2.21E-08
KRT5	-2.523111	4.88E-90	1.01E-86
HDLBP	-2.369723	5.95E-87	9.55E-84
SFT2D2	-2.321524	1.37E-35	7.05E-33
PARGP1	-2.294403	0.002871588	0.022437746
GRK6P1	-2.289473	0.003402756	0.025538337
IL16	-2.283787	0.000132386	0.001960703
BLZF2P	-2.248732	2.25E-05	0.000446007
RRH	-2.228554	0.002961336	0.02297698
TMEM120A	-2.222566	2.99E-15	3.30E-13
DIABLO	-2.210728	1.75E-39	1.05E-36
A2ML1	-2.203452	2.02E-11	1.50E-09
B4GALT6	-2.098323	2.07E-24	5.08E-22
FGF18	-2.080488	1.68E-05	0.000350268
MUC20	-2.073228	0.000359832	0.004487814
ACSL4	-2.067186	1.51E-40	9.49E-38
ECT2	-2.065526	2.57E-51	2.07E-48
LOC643454	-2.061486	1.99E-06	5.38E-05
NLGN3	-2.050233	7.75E-05	0.00126767
LOC100129034	-2.038316	5.40E-13	4.70E-11
CAPN6	-2.026466	1.78E-06	4.89E-05
LINC01132	-2.024891	0.000138804	0.002039041
LINC01814	-2.012567	0.001211435	0.011535771
FOXJ3	-1.99379	2.13E-36	1.14E-33
MGAT4A	-1.984288	5.34E-39	3.09E-36
BCAS1	-1.979265	4.25E-11	3.07E-09
ANGPT1	-1.970717	9.26E-25	2.39E-22
NTSR1	-1.964572	0.000812827	0.008450746
KRTAP3-1	-1.962811	0.007335746	0.044572597
BIVM	-1.951345	8.74E-16	1.05E-13
LINC00707	-1.949254	0.000770952	0.008143425
CCDC9B	-1.947582	1.71E-07	5.99E-06
RTEL1P1	-1.946986	0.004983867	0.033790709
KRT7	-1.946433	0.000738198	0.007875023
ZNF117	-1.911181	0.002128476	0.017846357
SUDS3P1	-1.910871	0.002696902	0.021337559
REEP4	-1.893669	1.70E-14	1.76E-12
PLEKHA3	-1.877251	5.13E-26	1.40E-23
GPR3	-1.869556	0.000144579	0.002115267
RPS14P3	-1.857456	0.000160411	0.002314116
TAS2R5	-1.850439	0.001807795	0.015751466
ZFHX3	-1.836753	0.000652373	0.007193025
LRRC37A9P	-1.826299	0.004567374	0.031664939
NKD1	-1.824965	9.04E-13	7.73E-11
TBL3	-1.821554	8.71E-28	3.00E-25
ATP5MF-PTCD1	-1.82123	3.60E-06	9.10E-05
LINC01061	-1.820099	0.007428835	0.045024656
EIF5B	-1.81999	6.47E-19	1.04E-16
DYNC1LI1	-1.817693	6.03E-32	2.72E-29
ALPK3	-1.81569	2.98E-07	9.85E-06
HR	-1.814478	0.000114098	0.001734273
MUC16	-1.80821	2.39E-05	0.000470723
TMEM269	-1.806826	0.008527002	0.049459803
HIPK1	-1.803977	1.44E-27	4.73E-25
SLC22A20P	-1.799764	0.000378375	0.004666737
DNAJC11	-1.797109	1.14E-33	5.51E-31
MKRN8P	-1.788328	0.001649705	0.014638726
SEMA4A	-1.785599	0.000418122	0.00507469
ZNF670-ZNF695	-1.784699	0.007333854	0.044572597
EMP1	-1.780122	2.71E-29	9.78E-27
MMP24	-1.777954	0.002205867	0.018304138
HOXA3	-1.774315	0.004799389	0.032817014
ARL6IP6	-1.76876	4.44E-22	9.73E-20
LOC646870	-1.762802	0.000903523	0.009139551
LY6G5B	-1.760119	0.002482178	0.020044628
CPP	-1.756061	0.005546011	0.036307773
SPRY4-IT1	-1.755485	9.53E-05	0.001508383
EIF1AXP1	-1.749173	2.74E-16	3.56E-14
CHD5	-1.746591	0.004999628	0.03388168
GHRLOS	-1.744707	3.67E-05	0.00067345
DLX2	-1.741905	2.31E-08	1.02E-06
ODF2L	-1.738102	1.86E-20	3.41E-18
SLC29A2	-1.734694	3.07E-13	2.75E-11
REEP3	-1.731736	6.87E-27	2.03E-24
NHLRC2	-1.730001	1.05E-20	1.95E-18
DTD1	-1.713858	1.57E-17	2.18E-15
NPFFR1	-1.713341	2.46E-05	0.000481449
DLX5	-1.711194	4.60E-06	0.000112344
KSR2	-1.71055	0.00623233	0.039669013
NANOGP5	-1.710418	0.00101741	0.010036625
ERI3-IT1	-1.70094	0.003199157	0.024415953
DIP2C	-1.699252	2.96E-18	4.46E-16
WASHC5	-1.696742	1.93E-31	8.02E-29
KATNAL1	-1.689631	1.05E-15	1.24E-13
UHMK1	-1.687682	5.33E-24	1.24E-21
AOC3	-1.686175	0.000843769	0.008693287
FKBP11	-1.685651	0.004451353	0.031099231
ACTN4	-1.684565	4.95E-24	1.17E-21
RUNX2	-1.677822	2.70E-06	7.08E-05
LOC101927136	-1.673995	0.004489476	0.031305054
WNK1	-1.673413	3.38E-14	3.39E-12
C5orf24	-1.673199	2.33E-16	3.06E-14
IPO4	-1.671149	2.81E-20	5.08E-18
VPS52	-1.670708	1.39E-21	2.80E-19
LINC00852	-1.667789	0.006373984	0.040281829
IDI2-AS1	-1.664578	0.003266937	0.024730679
STK32A-AS1	-1.664344	0.003470593	0.02595314
USP2	-1.662703	0.002879577	0.022487459
MTMR10	-1.659015	1.30E-17	1.86E-15
MYLK2	-1.657743	0.000412887	0.005019576
SMAD9	-1.656812	0.000515816	0.005945873
TNRC6B	-1.656045	1.73E-15	2.00E-13
ZBTB20	-1.651816	7.25E-05	0.00119662
RFESDP1	-1.650802	0.002589152	0.020688882
SND1-IT1	-1.648926	0.001289799	0.012043961
ASPHD2	-1.648203	0.007318868	0.044544942
FAM122B	-1.645991	1.57E-12	1.29E-10
CFL2	-1.643721	1.52E-19	2.56E-17
CASP7	-1.643516	1.02E-26	2.94E-24
CASS4	-1.64344	0.001483519	0.013470013
DNAH1	-1.642058	0.000357018	0.004468137
GOLGA1	-1.639867	1.32E-19	2.26E-17
TAS2R3	-1.639299	0.005289954	0.035184715
PIP5K1C	-1.639275	2.82E-05	0.000541385
CCDC6	-1.638373	2.76E-19	4.48E-17
LMNA	-1.637587	2.46E-19	4.05E-17
RPL39P34	-1.635545	0.005528761	0.036260542
MSLN	-1.635168	1.90E-13	1.76E-11
PHOSPHO2-KLHL23	-1.624141	8.18E-06	0.00018516
SMARCD1	-1.623877	5.42E-16	6.69E-14
CST7	-1.622632	9.97E-05	0.001566591
WDFY3-AS2	-1.621221	0.002499909	0.020165284
NRP2	-1.618036	2.52E-07	8.51E-06
DMAP1	-1.618024	1.36E-10	9.01E-09
EIF1AX	-1.61732	2.57E-21	5.02E-19
GATAD2B	-1.614012	0.003671189	0.02696496
ELK3	-1.613732	1.18E-10	7.91E-09
NEAT1	-1.610976	0.00065292	0.007193567
CASTOR2	-1.609756	1.14E-07	4.15E-06
FANCD2P1	-1.608117	0.006533191	0.041024013
YWHAZP4	-1.604824	0.002586381	0.020688882
FAM171B	-1.603018	1.46E-21	2.90E-19
SGMS2	-1.602614	1.52E-15	1.77E-13
FAM171A1	-1.601459	1.48E-06	4.14E-05
CHM	-1.595281	8.84E-14	8.46E-12
BARX2	-1.594242	1.49E-12	1.24E-10
TPH1	-1.59413	0.005307032	0.035189517
CCHCR1	-1.59137	6.28E-13	5.44E-11
BMS1P2	-1.590084	3.65E-06	9.22E-05
HOMEZ	-1.584121	6.43E-08	2.54E-06
UBA2	-1.579108	2.20E-18	3.38E-16
FLNA	-1.573894	9.95E-21	1.87E-18
LRGUK	-1.572231	0.000425695	0.005145003
SEMA3B	-1.571833	0.00035952	0.004487795
PANK3	-1.571684	5.72E-16	7.01E-14
CCNK	-1.570612	1.08E-06	3.13E-05
ZNF101P2	-1.568511	0.001204069	0.011503516
ANKFY1	-1.568303	5.78E-23	1.31E-20
MARVELD2	-1.563856	1.03E-17	1.48E-15
KRT80	-1.560185	2.83E-14	2.86E-12
BAHCC1	-1.558231	0.000610053	0.006799008
PROSER3	-1.557743	8.42E-05	0.001365687
SLC10A5	-1.557319	0.008322723	0.048667053
CYTB	-1.556753	2.01E-07	6.96E-06
LOC101928673	-1.556737	0.002202156	0.018291259
SLC36A1	-1.556627	1.41E-09	7.94E-08
UNC5B	-1.555257	6.56E-08	2.58E-06
MNAT1	-1.554748	6.42E-16	7.80E-14
TENM1	-1.554085	0.001854731	0.016073223
CDC26P1	-1.552357	2.45E-05	0.000479662
MEX3A	-1.55137	0.000173194	0.002454427
ANXA2	-1.550264	3.41E-15	3.70E-13
NUP62	-1.550205	3.65E-16	4.64E-14
ANKRD1	-1.549354	1.96E-15	2.20E-13
MAP2K5	-1.546912	5.46E-07	1.71E-05
CEP295NL	-1.546507	0.004639402	0.032026055
ONECUT2	-1.544622	0.000104481	0.001622211
ZNF849P	-1.54441	0.003645832	0.026841639
AKNAD1	-1.54298	0.006274068	0.039846949
KIAA0754	-1.541037	1.21E-10	8.09E-09
MYH10	-1.540736	5.82E-21	1.12E-18
SLC41A1	-1.538329	5.62E-08	2.26E-06
ASAP1-IT1	-1.538288	0.000314831	0.004041062
LPAR5	-1.53253	0.008143136	0.047892265
MICAL2	-1.531288	1.02E-10	6.99E-09
LOC101927391	-1.527724	2.38E-07	8.15E-06
PNMA2	-1.527245	0.000236149	0.003184267
RPUSD4	-1.525587	1.95E-15	2.20E-13
RABGAP1	-1.525143	2.16E-19	3.58E-17
ABHD5	-1.525029	1.21E-14	1.27E-12
RPSAP6	-1.524042	0.0052042	0.034746752
ZBED5-AS1	-1.521891	6.71E-05	0.001120266
ATG10	-1.521493	5.09E-08	2.07E-06
DAG1	-1.51456	1.34E-10	8.91E-09
LINC00622	-1.514166	0.004938346	0.033576572
KAZN	-1.513496	8.87E-07	2.62E-05
NOL4L	-1.513432	0.000226738	0.003074577
THAP5P1	-1.511797	0.005481249	0.036079898
SYPL1	-1.510142	1.79E-10	1.15E-08
CREG2	-1.508771	7.12E-06	0.000164562
SLC7A7	-1.507555	0.002871659	0.022437746
DLGAP4	-1.504802	6.79E-07	2.05E-05
HSP90AB4P	-1.504776	0.003223472	0.024542844
CARM1	-1.502735	3.19E-09	1.69E-07
CBX5	-1.502596	4.14E-08	1.74E-06
NAV2	-1.49941	5.59E-08	2.25E-06
CRYBB2P1	-1.497432	3.39E-05	0.000633962
WNT11	-1.493889	1.51E-08	6.88E-07
BMP4	-1.492683	2.41E-10	1.51E-08
SYNC	-1.492238	8.74E-05	0.001406709
MKRN5P	-1.492063	0.006381556	0.040281829
ND1	-1.491512	2.13E-07	7.34E-06
ANXA2P2	-1.491018	0.001017896	0.010036625
CHAMP1	-1.490594	3.70E-05	0.000677441
POGZ	-1.48988	3.62E-08	1.52E-06
GRK5	-1.488946	7.34E-05	0.001208497
DCAF4L1	-1.488402	0.004409084	0.03090849
DYNLL2	-1.485883	3.33E-10	2.06E-08
HIPK2	-1.485603	1.53E-06	4.27E-05
ZNF337-AS1	-1.48533	0.001589283	0.014224825
SERTAD4	-1.483966	1.12E-10	7.54E-09
MINAR1	-1.483789	3.25E-07	1.06E-05
MEN1	-1.482936	4.25E-10	2.58E-08
TMED5	-1.481857	4.05E-13	3.55E-11
SSH3	-1.48146	3.61E-07	1.16E-05
IGSF11	-1.481332	0.000875898	0.008931723
SWAP70	-1.481039	3.97E-13	3.50E-11
LRRC37A8P	-1.48047	0.000524476	0.006025144
MAP1A	-1.479499	0.000160721	0.002316273
ACBD7	-1.479178	0.000293186	0.003807726
SFXN1	-1.478235	2.28E-18	3.47E-16
ADAMTSL2	-1.476945	0.003837563	0.027931504
SPDYA	-1.475686	0.005798903	0.037572007
CPSF1	-1.47519	5.73E-09	2.93E-07
PCGF2	-1.474239	0.000402108	0.004913334
CUX1	-1.473711	2.49E-07	8.44E-06
AAK1	-1.47284	9.42E-08	3.51E-06
TRIM66	-1.471554	3.54E-06	8.97E-05
MIR4697HG	-1.468504	0.000494373	0.005739884
DDX50P1	-1.468162	0.003447997	0.025810872
DLX3	-1.467176	0.001462731	0.013323112
TAF4	-1.465915	0.000942696	0.009443289
PLAC8L1	-1.465617	0.008245032	0.048366162
AKAP8L	-1.465382	5.11E-11	3.68E-09
ANKFN1	-1.461968	0.003772958	0.02754119
GAB1	-1.461819	7.39E-13	6.36E-11
MICALCL	-1.461212	0.000211631	0.002902396
CCN1	-1.460797	8.90E-07	2.62E-05
MBNL1	-1.460618	1.42E-15	1.67E-13
PCMTD2	-1.458744	7.35E-09	3.63E-07
SALL4	-1.457007	4.59E-05	0.000807791
KIAA1549	-1.456747	1.38E-06	3.90E-05
ADAMTSL5	-1.455784	0.004837761	0.033001336
YME1L1	-1.455303	7.20E-15	7.71E-13
TCF7L2	-1.454274	4.07E-06	0.000101329
TNFSF4	-1.453219	0.002682494	0.02124908
POU6F2	-1.452566	3.76E-06	9.46E-05
NACC2	-1.452361	4.41E-10	2.65E-08
FOXM1	-1.449913	1.20E-06	3.47E-05
R3HDM1	-1.447241	1.22E-06	3.51E-05
FANCA	-1.446992	1.91E-06	5.20E-05
DNHD1	-1.446841	4.77E-06	0.000115895
MACF1	-1.44675	3.81E-16	4.79E-14
EPB41L1	-1.445602	1.03E-05	0.000227469
STRN3	-1.445537	3.97E-13	3.50E-11
DISC1	-1.445446	0.00047068	0.005540451
PHTF2	-1.445356	1.44E-12	1.21E-10
ABCC1	-1.445034	3.14E-05	0.000593652
ND5	-1.444976	6.81E-06	0.00015926
SPRY4	-1.444835	3.28E-06	8.37E-05
STK3	-1.443905	2.20E-14	2.24E-12
LARP1	-1.442701	1.29E-06	3.67E-05
MSL2	-1.44236	6.07E-09	3.09E-07
PITPNB	-1.441791	1.06E-10	7.14E-09
CDC26	-1.441105	8.20E-08	3.13E-06
EIF4G3	-1.440762	9.49E-14	9.03E-12
RAP2A	-1.439498	7.62E-12	5.83E-10
MSX1	-1.435469	5.49E-09	2.83E-07
MYBBP1A	-1.435448	1.62E-09	8.98E-08
EPB41L4B	-1.435414	1.20E-13	1.13E-11
EFCAB7	-1.435112	1.41E-06	3.95E-05
PTP4A1	-1.434033	1.70E-08	7.67E-07
PPP3CB	-1.43369	4.25E-06	0.000105217
MIDN	-1.433151	0.000317651	0.004067003
ABCC3	-1.430529	0.002860997	0.022390751
RMI1	-1.43011	5.58E-06	0.000132548
NKILA	-1.429512	0.000525132	0.006025144
HNRNPM	-1.429084	1.53E-12	1.27E-10
YAP1	-1.428721	2.33E-11	1.72E-09
KIF27	-1.428199	8.70E-09	4.22E-07
CRYBG1	-1.427448	6.48E-14	6.29E-12
SPTLC1	-1.425955	1.37E-12	1.16E-10
RAP1A	-1.425081	1.81E-08	8.12E-07
ERP27	-1.424421	0.00033597	0.004275045
STMP1	-1.423167	1.84E-06	5.04E-05
CELF2	-1.422846	1.33E-05	0.000285442
CGGBP1	-1.422759	1.04E-10	7.07E-09
NUMBL	-1.422627	0.00034808	0.004375212
CREB5	-1.420319	0.006489715	0.040821945
TNS1	-1.42013	0.000128582	0.001914168
HEBP1	-1.418554	0.000292231	0.00379874
MISP	-1.417644	3.07E-06	7.89E-05
APOOL	-1.417494	5.03E-05	0.000872365
TGFB1	-1.415549	0.002023052	0.017111307
DARS2	-1.413861	6.40E-15	6.90E-13
HIVEP3	-1.413478	0.007550047	0.045530215
KANSL1L-AS1	-1.413147	0.005772949	0.037437403
TGM6	-1.411222	0.0002176	0.002967368
P2RY2	-1.410978	1.34E-06	3.81E-05
CDCP1	-1.410204	4.34E-08	1.81E-06
ZNF746	-1.409829	7.34E-08	2.85E-06
SMG7	-1.407458	1.19E-06	3.43E-05
ZNF761	-1.407137	1.11E-05	0.000243342
MICOS10P1	-1.406443	0.002040974	0.017216211
ACTN1	-1.405256	1.05E-06	3.06E-05
CYB5R3	-1.404669	0.000192539	0.002689036
TPRG1	-1.404406	0.008596089	0.049756214
SHANK2	-1.404264	5.14E-05	0.000888475
FAM117B	-1.404066	8.11E-06	0.00018408
CTDNEP1	-1.402891	1.63E-05	0.000340809
POLR2A	-1.401638	2.34E-05	0.000462465
LOC101929331	-1.401148	0.00067356	0.007353709
ADAM20	-1.40037	0.004627546	0.031990045
ITPR1	-1.399835	2.81E-07	9.36E-06
LOC100129534	-1.399745	0.005291703	0.035184715
CREBL2	-1.398144	2.73E-09	1.46E-07
DNAL1	-1.398071	7.77E-08	3.01E-06
SLC2A1-AS1	-1.397646	0.000118706	0.001798639
DOCK5	-1.39759	5.69E-09	2.92E-07
SOX9	-1.39735	0.000189383	0.002650079
RRM2B	-1.397151	3.27E-10	2.03E-08
LOC100421561	-1.396951	0.001199429	0.011474349
UBQLN2	-1.396936	4.49E-05	0.000795707
PLXND1	-1.396837	4.38E-07	1.39E-05
RAB11FIP5	-1.396473	3.52E-07	1.14E-05
CDK6	-1.395247	7.98E-12	6.07E-10
SPRED2	-1.394862	1.25E-06	3.58E-05
GNB1L	-1.39443	1.81E-05	0.000371544
COMMD1	-1.394299	3.06E-07	1.01E-05
TSPAN17	-1.393487	9.84E-11	6.81E-09
SLC4A7	-1.393187	4.66E-08	1.91E-06
CLDND1	-1.393066	1.13E-09	6.44E-08
MBD6	-1.392886	0.005002494	0.033885216
BAZ2A	-1.39184	4.96E-05	0.000863498
LOC100129577	-1.390949	0.000113108	0.001722836
MOB3B	-1.390614	0.000130303	0.001933806
TLE3	-1.390562	2.35E-05	0.000462575
OSTCP8	-1.390188	0.006658873	0.041614355
CDRT1	-1.390087	0.000205677	0.002834183
EPHX1	-1.389564	0.000435998	0.005234514
PPP2CB	-1.389184	1.96E-08	8.73E-07
ADAM20P1	-1.38893	0.007190444	0.044078827
EYA3	-1.388912	4.35E-07	1.38E-05
NPIPB4	-1.38802	0.007827703	0.046678817
SUFU	-1.387439	0.000104296	0.001622
CCDC28A	-1.386676	4.00E-05	0.000723343
VEZT	-1.386509	4.35E-10	2.62E-08
GSKIP	-1.385573	1.37E-06	3.88E-05
TCF7	-1.385123	0.002197437	0.018291259
PLEKHM1	-1.385043	2.21E-05	0.000440039
ABHD18	-1.384352	1.47E-07	5.26E-06
UBE2T	-1.384332	1.09E-07	4.02E-06
SYT7	-1.38344	1.38E-06	3.89E-05
MYH9	-1.380565	1.03E-10	7.04E-09
S100A3	-1.38003	0.000384377	0.004732686
PHIP	-1.380009	1.84E-09	1.01E-07
NEK9	-1.379864	7.85E-09	3.86E-07
PRR3	-1.379392	0.001357035	0.012566268
TIAM2	-1.378911	0.000182246	0.002565114
SEC31B	-1.378694	0.006989106	0.043192618
RMDN3	-1.377764	1.06E-09	6.07E-08
CUL9	-1.377758	4.54E-06	0.00011133
HIP1R	-1.377074	7.79E-11	5.46E-09
GSDMB	-1.376893	0.005134138	0.034422058
CEP126	-1.376758	0.002467022	0.019966851
MFAP5	-1.376697	0.0083672	0.048788976
ZNF275	-1.376657	8.77E-05	0.001410443
HMGN4	-1.376647	4.45E-08	1.84E-06
APLN	-1.375683	0.000891684	0.009051467
MANSC4	-1.375674	9.09E-06	0.000202829
FAM189B	-1.375037	0.005532085	0.036265888
CAD	-1.374068	1.64E-06	4.56E-05
EGR1	-1.373555	9.12E-05	0.001458774
GFPT1	-1.373462	9.12E-11	6.34E-09
ZNF827	-1.373112	0.000694617	0.007538052
UBXN11	-1.371883	0.000978225	0.009725065
GYS1	-1.371492	1.63E-07	5.72E-06
MTSS1	-1.369828	6.17E-07	1.88E-05
KMT2A	-1.369789	3.90E-06	9.76E-05
WASF1	-1.369753	0.006320318	0.040021983
SLC35C1	-1.369533	0.000775438	0.008169792
CTAGE9	-1.368557	0.000891282	0.009051467
ATP11A	-1.368302	9.16E-05	0.001460308
TACC2	-1.366939	1.27E-05	0.000273626
SMARCC2	-1.366227	4.56E-05	0.000804658
STXBP1	-1.365908	0.005465454	0.036040088
RIN2	-1.365607	8.52E-11	5.95E-09
SRF	-1.365154	5.68E-06	0.000134777
TPCN1	-1.365147	0.000254555	0.003385094
DENND2B	-1.364909	0.000810979	0.008439671
CACNG4	-1.364335	0.001583039	0.014202161
PIK3C2B	-1.364141	0.00084646	0.008708596
CRIP2	-1.362911	0.00152253	0.013746512
RABEP2	-1.361747	3.11E-06	7.97E-05
LOC100506023	-1.361275	0.00251264	0.02024538
PABPC1	-1.36127	2.82E-06	7.33E-05
KIF1B	-1.360817	6.51E-08	2.56E-06
NUTM2B-AS1	-1.359176	0.000373842	0.004630584
LMCD1	-1.358824	0.001380421	0.012701453
UGT8	-1.358604	0.001708593	0.01505958
FAM161A	-1.358366	0.000206764	0.002846456
E2F7	-1.357892	2.94E-07	9.73E-06
FAM126B	-1.357757	5.13E-09	2.68E-07
FAM86C2P	-1.357487	0.002147875	0.017956931
LTBP2	-1.357155	6.73E-05	0.001122797
EEA1	-1.356499	5.89E-08	2.35E-06
TSKU	-1.356454	2.78E-08	1.20E-06
CMTM6	-1.356184	1.36E-08	6.33E-07
RAB40B	-1.356127	0.001407461	0.012892806
SLC36A4	-1.353685	0.000802645	0.008395249
NUS1	-1.353628	9.79E-06	0.000217145
SMIM13	-1.353252	2.69E-07	8.97E-06
ZNF462	-1.353203	2.65E-05	0.000512322
RFX3	-1.352729	0.000264837	0.00350569
LOC100288637	-1.352691	2.01E-06	5.42E-05
MTSS2	-1.352458	5.11E-05	0.000885304
GAST	-1.352187	0.000792067	0.008302627
IGF2BP1	-1.351412	4.04E-05	0.000729789
NOTUM	-1.350788	1.50E-07	5.36E-06
OLFML2A	-1.350702	0.007424577	0.045017729
FAM222A	-1.35001	0.007974418	0.047319462
OBSCN	-1.349929	0.00126326	0.011911559
NXPE3	-1.349533	8.40E-06	0.000189399
CLHC1	-1.349499	4.25E-05	0.0007625
PPRC1	-1.349182	0.000208215	0.002860972
STON1	-1.348933	0.003127556	0.023996192
CYP24A1	-1.348554	0.000840636	0.008673372
CTAGE15	-1.348323	0.002778563	0.021863975
TMPPE	-1.348158	0.00050694	0.005848218
GJA1	-1.348026	1.21E-07	4.38E-06
YLPM1	-1.347838	1.02E-05	0.000225911
HOXB3	-1.347365	0.003521495	0.026200946
ANKS6	-1.34683	8.27E-09	4.05E-07
MDC1	-1.346062	0.000883362	0.008992254
LITAF	-1.345863	2.11E-09	1.14E-07
NDUFA8	-1.344501	2.50E-07	8.47E-06
HNRNPA3	-1.343133	1.22E-05	0.000265053
FXN	-1.342896	0.000493135	0.005730114
AMD1	-1.34181	1.23E-08	5.74E-07
SGPP2	-1.341237	0.005236244	0.03489622
ATXN2	-1.340811	0.000947943	0.009489282
MYCL	-1.340714	0.008446981	0.049095743
SCAF4	-1.340523	0.00204141	0.017216211
B4GALT1	-1.339967	0.000179813	0.002533331
SCAMP4	-1.339507	0.006917636	0.042860877
CCP110	-1.338779	2.57E-06	6.76E-05
IRS1	-1.337685	1.40E-06	3.93E-05
CSNK2A2	-1.337361	3.55E-05	0.000659119
TOM1L2	-1.337259	0.001418866	0.012980828
FGFRL1	-1.337168	4.35E-05	0.000776564
MALL	-1.336883	1.13E-08	5.32E-07
RAI1	-1.336849	0.002089029	0.017582112
GSE1	-1.336717	0.000194145	0.002705365
NSD3	-1.336673	1.40E-07	5.00E-06
N4BP2L2-IT2	-1.336622	0.001603055	0.014330338
UBXN7	-1.335378	4.36E-05	0.000777204
BCL11B	-1.335246	0.000302955	0.003920517
NPAS2	-1.335096	0.006443561	0.040566928
NUP214	-1.334114	2.13E-05	0.000427214
DUSP19	-1.333987	0.000243348	0.003257031
ZNRF2	-1.333581	1.27E-09	7.21E-08
TENM3	-1.333575	3.37E-07	1.10E-05
BCOR	-1.333038	7.09E-07	2.14E-05
FBXO10	-1.33281	1.97E-05	0.000398092
PRNCR1	-1.332188	0.000951929	0.009515994
PPM1B	-1.332036	4.61E-08	1.90E-06
PRRC2C	-1.331983	4.97E-06	0.000119868
CHRM3	-1.331519	7.39E-06	0.000170214
SH3BGRL2	-1.331272	5.39E-10	3.19E-08
SRRM1	-1.330584	0.000281088	0.003683703
RAD51	-1.330142	3.21E-08	1.37E-06
FNTB	-1.3293	1.96E-05	0.000396764
CLDN9	-1.329258	0.005997973	0.038533644
NUBPL	-1.328429	6.10E-06	0.000144084
KANTR	-1.327546	0.000537176	0.006133614
LAD1	-1.327218	6.01E-08	2.38E-06
ZSWIM6	-1.325831	0.000483831	0.005672166
CORO1A	-1.325741	0.004034803	0.029045358
USB1	-1.325217	0.000169758	0.002419976
TMEM41B	-1.325128	5.02E-08	2.04E-06
ZHX3	-1.324843	1.02E-06	2.99E-05
DTWD2	-1.324635	7.92E-05	0.001294075
IGDCC3	-1.323995	0.002653112	0.021083412
RBM47	-1.323961	3.30E-08	1.40E-06
SF3B4	-1.323814	0.001571611	0.014130701
CDC27	-1.323746	9.94E-09	4.77E-07
FRS2	-1.323434	1.38E-08	6.36E-07
SH3D19	-1.323152	3.23E-06	8.25E-05
RIF1	-1.323002	1.22E-07	4.41E-06
AFF4	-1.322331	5.71E-07	1.76E-05
GNA12	-1.321827	0.000230488	0.003113738
NUS1P1	-1.321566	5.38E-05	0.000923697
MRPS7	-1.321012	1.31E-06	3.73E-05
VMA21	-1.321002	7.85E-08	3.03E-06
RAB7A	-1.320958	6.80E-05	0.001133116
ATXN10	-1.32079	4.66E-09	2.45E-07
ATMIN	-1.320445	2.08E-09	1.13E-07
LINC00641	-1.319937	7.33E-05	0.001208497
ABI2	-1.318889	8.82E-06	0.000197313
TRAM2	-1.317963	1.49E-05	0.000314685
CABLES2	-1.317561	0.008343892	0.048731699
RNF182	-1.317445	6.12E-07	1.87E-05
PPP2R5E	-1.317362	2.17E-05	0.000432365
CNN3	-1.31712	2.71E-09	1.45E-07
SRR	-1.316897	0.0029455	0.022890966
SAMD4B	-1.316373	0.002537902	0.020370261
MBOAT2	-1.315779	7.10E-09	3.54E-07
MICOS10	-1.315677	1.68E-06	4.65E-05
NPEPL1	-1.315301	0.003597335	0.026584598
QSER1	-1.314958	7.99E-06	0.000181867
MIEF1	-1.314914	5.53E-08	2.23E-06
CDC14B	-1.314353	2.62E-07	8.76E-06
MOB1B	-1.31397	8.30E-05	0.001347854
FSD1L	-1.313937	0.000464427	0.005489203
TEAD1	-1.313699	2.05E-06	5.51E-05
LINC01963	-1.313498	0.000528662	0.006060114
SPATA13	-1.313166	1.03E-06	3.00E-05
CANT1	-1.312811	4.99E-08	2.04E-06
RERE	-1.312798	0.001944437	0.016641114
ARF4	-1.311987	3.58E-08	1.52E-06
VPS53	-1.311594	0.000634069	0.007023345
PNMA1	-1.310689	2.09E-06	5.62E-05
RPRD2	-1.310356	0.000584512	0.006580309
EHD2	-1.310185	0.00322327	0.024542844
SLC23A2	-1.310158	7.01E-06	0.000162367
PRDM1	-1.310038	0.000358329	0.004476793
PLXNA3	-1.309659	0.004257898	0.030155767
CTAGE8	-1.309644	0.000186477	0.002619557
PTBP2	-1.309308	1.26E-07	4.54E-06
UBE4B	-1.309082	4.34E-06	0.000106875
RREB1	-1.308835	0.000106036	0.001641062
L1CAM	-1.308725	0.001658301	0.014696959
LMNB1	-1.308601	2.90E-08	1.25E-06
KCNQ1OT1	-1.307187	0.000162554	0.002333384
CCNI	-1.307038	4.77E-05	0.000835101
CLEC2D	-1.306879	9.81E-05	0.001544699
SRM	-1.306804	0.002883342	0.022492557
FBXO41	-1.306705	0.000328854	0.004195568
HNRNPA2B1	-1.306412	0.000769158	0.00813922
KIFC3	-1.305603	2.69E-05	0.000518096
STIP1	-1.305325	2.35E-08	1.03E-06
NR2C2	-1.305299	5.80E-07	1.79E-05
RYBP	-1.305005	1.98E-06	5.38E-05
RTEL1	-1.304563	0.000459982	0.005450028
ELK4	-1.304329	6.19E-05	0.001043578
MSX2	-1.304278	8.33E-09	4.07E-07
ADGRE5	-1.30412	0.000170638	0.002425343
ZNF280C	-1.303947	0.000282842	0.003699982
RHBDF2	-1.303797	0.003560194	0.026364042
KLF5	-1.303717	5.15E-05	0.000889422
HSPA12A	-1.303717	8.62E-05	0.00139063
CTDSP2	-1.303714	6.01E-05	0.001016784
MORN1	-1.303528	0.000123338	0.001851353
SLC35D1	-1.303517	8.54E-08	3.22E-06
IGIP	-1.303241	0.001351396	0.012522066
LNPK	-1.302881	9.81E-07	2.88E-05
CDK19	-1.302641	2.50E-05	0.000486514
SH3PXD2A	-1.301823	0.000737246	0.007870677
ASAP1	-1.301401	0.000844462	0.008694231
ATG12	-1.301115	8.76E-07	2.60E-05
HDAC4	-1.301081	0.000173525	0.00245463
TET3	-1.300938	0.000124422	0.001863745
SLC25A23	-1.299602	0.001641664	0.014576318
DENND1B	-1.299137	3.52E-05	0.000654929
SBF2	-1.299019	1.08E-08	5.14E-07
PDLIM5	-1.298926	1.59E-07	5.60E-06
ITGB1	-1.298743	1.45E-08	6.62E-07
GPD2	-1.298359	2.40E-06	6.39E-05
EIF4G2	-1.298182	1.40E-08	6.41E-07
PPARGC1B	-1.297739	0.001055535	0.010344242
COX3	-1.297714	0.000488438	0.005703042
TMOD2	-1.296682	1.43E-06	3.99E-05
MIR600HG	-1.296431	0.000876115	0.008931723
SGK1	-1.296207	0.000202047	0.002794827
FAM120A	-1.295644	1.57E-07	5.55E-06
FAM98B	-1.295128	0.000315066	0.004041062
ATP2B4	-1.294641	4.04E-06	0.000100803
NFIB	-1.294326	8.22E-05	0.001340008
VANGL1	-1.293958	5.85E-08	2.34E-06
NRP1	-1.293775	0.000218318	0.002974355
ZBTB10	-1.293563	9.59E-06	0.000212902
FLJ37201	-1.29316	0.001299467	0.012102956
MAP2	-1.293136	1.09E-05	0.000239988
EDN1	-1.293039	0.001365011	0.012599765
POU2F1	-1.292816	3.76E-05	0.000687596
MAP4	-1.292393	7.47E-05	0.001227715
STX3	-1.292246	2.60E-07	8.71E-06
GJA3	-1.291765	0.001836603	0.015954385
BMPR2	-1.291395	0.000739563	0.007883759
ZNF519	-1.29133	0.001010856	0.010000307
NOTCH3	-1.290943	0.001280114	0.012011165
STARD7	-1.290892	1.86E-08	8.31E-07
LOC399975	-1.290885	0.000339549	0.00430743
STRA6	-1.290754	0.000279881	0.003671222
MAP2K3	-1.290676	0.001720726	0.01511887
TFAM	-1.28956	9.41E-08	3.51E-06
ARID5B	-1.28926	6.49E-06	0.000152729
PRCC	-1.288819	0.000112517	0.001715646
HNRNPA1P33	-1.288623	0.001318592	0.012249519
KIAA1671	-1.287796	0.000689962	0.007504444
CDC42BPG	-1.287563	3.82E-05	0.000696193
H2AC7	-1.287043	0.008096778	0.047751498
BMI1	-1.285397	3.31E-05	0.000620194
KIAA1217	-1.284446	0.004510693	0.031407545
MYEOV	-1.283411	0.000170579	0.002425343
STYK1	-1.283093	9.98E-05	0.001566591
TJAP1	-1.282953	0.003160433	0.024197066
NHSL1	-1.282542	0.002015506	0.017060652
CLCN4	-1.282297	0.003473894	0.025964396
XPNPEP3	-1.282189	0.000813797	0.008450746
TACC3	-1.281921	0.002007798	0.017037014
TTC33	-1.281778	0.0007526	0.007999138
RAB12	-1.280986	0.00110042	0.010711496
PIP4K2B	-1.28094	1.10E-07	4.03E-06
PPP1R13B	-1.28074	0.001775821	0.015529033
RANBP10	-1.280695	0.000289455	0.003769439
RNF26	-1.280338	0.001630632	0.014505102
SAP130	-1.27984	0.000129903	0.001929847
MAN2B2	-1.279783	0.00016876	0.002408124
SPTBN1	-1.27952	6.80E-09	3.40E-07
OXSR1	-1.279163	4.23E-08	1.77E-06
CHML	-1.279072	4.21E-06	0.000104343
PRAG1	-1.279008	0.003201205	0.024418687
C18orf54	-1.278961	0.003532191	0.02625081
CFAP97	-1.27893	7.23E-07	2.18E-05
ANLN	-1.278255	1.01E-07	3.76E-06
CGNL1	-1.278239	0.003228138	0.024553668
EIF4EBP2	-1.27794	3.60E-05	0.000664147
ANK1	-1.277583	0.001623208	0.014474691
DIXDC1	-1.277479	0.002106277	0.017701297
MTR	-1.277376	6.83E-06	0.000159373
GDPD5	-1.27718	0.001515854	0.013703361
ND4	-1.277137	0.005276094	0.035129406
TNRC6A	-1.277078	7.00E-06	0.000162367
PACS1	-1.276854	0.000643907	0.007105093
HUWE1	-1.276593	0.00010653	0.001646941
ST3GAL1	-1.276366	6.32E-07	1.92E-05
CMTM4	-1.275935	7.44E-07	2.24E-05
DCP2	-1.27563	2.16E-06	5.79E-05
PRR11	-1.275216	4.95E-06	0.000119585
RNF168	-1.274666	7.64E-06	0.000175235
ELMSAN1	-1.273881	0.001094398	0.010660059
ASCC3	-1.273853	2.50E-06	6.63E-05
HIF1A	-1.273671	6.81E-08	2.66E-06
SEC63	-1.273587	0.000182677	0.002568677
PLEKHG2	-1.272308	0.008601922	0.049756214
UBE2D1	-1.271606	0.000501274	0.00580602
EDAR	-1.271494	1.03E-06	3.00E-05
COX2	-1.271475	0.001952387	0.016689385
PUDP	-1.271168	0.000485851	0.00569123
DDIAS	-1.271063	6.06E-07	1.86E-05
PRDM2	-1.270682	0.006377738	0.040281829
LHFPL2	-1.270547	0.000177051	0.002499293
RNF11	-1.270477	3.75E-06	9.46E-05
PPP1R10	-1.270355	0.000147069	0.002143025
USP37	-1.270345	1.79E-06	4.91E-05
CD81	-1.270203	1.08E-05	0.000238059
UCHL5	-1.269739	0.000122783	0.001846854
HDAC1	-1.269728	1.79E-07	6.24E-06
USP49	-1.269461	0.0019268	0.01652398
C21orf59-TCP10L	-1.269254	0.004978999	0.033773545
IQGAP1	-1.268917	8.50E-08	3.22E-06
FUT10	-1.268634	0.000884884	0.00900141
PURA	-1.26859	0.000341355	0.004320743
PIGA	-1.267821	0.000239972	0.003229796
PCBP1	-1.267449	0.004177009	0.029773802
SNHG17	-1.267127	0.000414943	0.00504034
PPL	-1.266959	0.000105126	0.001629474
GPATCH2L	-1.266893	1.16E-05	0.000253984
CCNJ	-1.266648	1.06E-05	0.000233519
DOP1B	-1.266375	0.00080708	0.008417276
SMAD6	-1.266041	0.002341309	0.019185723
GOLGA3	-1.265687	3.30E-06	8.40E-05
CASP2	-1.265678	0.00266096	0.021122556
ACACA	-1.26537	1.99E-06	5.38E-05
SETD5	-1.264843	0.000731528	0.007832771
EIF5A2	-1.264685	0.004095838	0.029382303
TBC1D22B	-1.264017	0.000748662	0.007969002
SYT1	-1.263817	0.000830427	0.008580284
PLEKHH1	-1.263359	0.001372371	0.012642294
AXIN2	-1.263041	5.54E-07	1.72E-05
LINC01004	-1.26289	0.006302764	0.039994053
PPP3R1	-1.262056	0.001936645	0.016584245
CSNK1G3	-1.261938	2.19E-05	0.000436082
CREB3L2	-1.261844	0.000757182	0.008035917
SEC16A	-1.261658	0.0058296	0.037681255
RUNX1	-1.261469	0.00169984	0.015017103
PCBP2	-1.261189	9.14E-05	0.00146006
HEPHL1	-1.261085	0.00455314	0.031596562
UQCC1	-1.260585	3.91E-07	1.25E-05
C1GALT1	-1.260177	2.26E-05	0.000447447
AIDA	-1.260101	0.000211362	0.00290146
NOM1	-1.259202	1.67E-05	0.000348403
KIF26B	-1.258835	0.000577565	0.006512247
UBE2K	-1.258013	0.000314702	0.004041062
VKORC1L1	-1.257966	0.000164617	0.002360152
HEG1	-1.257625	0.001437297	0.013141132
SLC11A2	-1.257289	1.63E-05	0.000340823
HEXIM1	-1.257001	0.000801834	0.008392835
TSPAN14	-1.256786	0.001287731	0.012034241
IGF1R	-1.256715	0.002125426	0.017831127
TLK1	-1.256714	0.000195757	0.002720839
ASAP2	-1.25642	2.19E-05	0.000436082
SEPTIN10	-1.256203	3.08E-06	7.90E-05
AGPAT3	-1.255795	1.87E-05	0.000380906
DKFZP586I1420	-1.254857	0.000447724	0.00534422
TMEM127	-1.254734	6.46E-05	0.001082521
DCAF7	-1.254702	1.69E-05	0.000351913
IQSEC1	-1.254702	0.00837918	0.048819446
CTAGE4	-1.254621	0.000948796	0.009491245
FTSJ3	-1.254396	1.32E-05	0.000283825
MAN2A1	-1.254112	2.68E-05	0.000515947
LOC653631	-1.25359	0.001184248	0.01136674
PRSS35	-1.253222	0.002208526	0.018315691
CIT	-1.253206	2.10E-05	0.000422744
LINC01355	-1.253182	0.008258768	0.0483906
ITGB4	-1.25315	0.004687527	0.032268227
SF3A1	-1.253094	0.002433041	0.019758211
DIP2A	-1.252307	2.06E-05	0.000413978
CAMK1D	-1.251999	0.000556284	0.006331562
MRTFB	-1.251979	0.001254455	0.011848554
KIF14	-1.251845	0.000113916	0.001733328
PALM2AKAP2	-1.250789	1.25E-06	3.58E-05
PCBP4	-1.250769	0.005095301	0.03427295
MAPK1IP1L	-1.250489	0.000734848	0.007856677
USF3	-1.250393	0.003203822	0.02442576
TYMS	-1.250331	0.00413495	0.029574819
RELL1	-1.250011	0.000771245	0.008143425
WASF2	-1.249927	0.00467112	0.032184857
SELENOI	-1.249513	4.56E-06	0.000111571
SLC2A4RG	-1.249437	0.004687878	0.032268227
ARID1B	-1.249361	0.002144667	0.017940488
SIK2	-1.249334	0.000110635	0.001695901
ALG13	-1.248512	0.002625596	0.020910738
SIK3	-1.248322	4.41E-05	0.000783394
ZNF611	-1.247681	0.002492023	0.020112897
PDLIM7	-1.247259	0.001586155	0.014205617
NANOS1	-1.247141	0.00177379	0.015520662
KPNA3	-1.246888	8.79E-05	0.001412025
PPFIBP1	-1.246612	5.63E-05	0.000958947
MMS22L	-1.246297	5.19E-05	0.000894475
ID3	-1.245939	0.000333554	0.004251788
UBE2R2	-1.245642	6.49E-05	0.001087655
TANC1	-1.245189	3.29E-05	0.000617866
DLAT	-1.245046	5.24E-06	0.00012525
GALNT12	-1.244883	0.001029339	0.010128724
IL17RD	-1.244874	0.001401211	0.012851841
STAT3	-1.244832	5.57E-05	0.000950177
TGOLN2	-1.244812	0.000519539	0.005983935
SENP1	-1.244753	0.000119213	0.001800656
AKIRIN2	-1.244435	0.00019427	0.002705365
CEP41	-1.24434	0.000625321	0.006947745
CKAP2	-1.243956	4.14E-05	0.000745636
IGFBP4	-1.243869	0.000815839	0.008464284
SAMD4A	-1.243761	3.79E-06	9.51E-05
MGLL	-1.243578	4.52E-05	0.000800004
SMARCC1	-1.243397	0.000109739	0.001683943
PHOSPHO2	-1.243167	0.003062736	0.023573935
PDZD8	-1.242824	2.25E-05	0.000446124
TCHP	-1.242709	0.005084751	0.0342498
ACVR1	-1.242663	0.006976525	0.043170237
TBL1X	-1.242366	0.001326875	0.01231855
COTL1	-1.242303	0.000142712	0.002090067
CLCN6	-1.242081	0.004477948	0.031239739
MEX3C	-1.242012	7.03E-05	0.001163597
DLG5	-1.241985	0.000901118	0.009121606
HSDL1	-1.241968	0.000108682	0.001673061
ZNF577	-1.241948	0.001188326	0.011390747
PBX3	-1.241844	3.32E-05	0.000621166
UNC13B	-1.24171	2.26E-06	6.05E-05
AMOT	-1.241665	0.000154049	0.002231239
VAPB	-1.241306	4.24E-05	0.000761658
UBA5	-1.241209	4.05E-05	0.000731191
UCK2	-1.240458	2.46E-05	0.000481449
MED14	-1.240333	0.001190409	0.011403154
DNAJB4	-1.240313	0.001798755	0.015691611
TNFAIP8	-1.239974	3.14E-05	0.000593652
SPRTN	-1.239794	0.000101075	0.001579498
ASF1B	-1.23924	0.000203033	0.002805771
C5orf51	-1.23911	0.002505155	0.020196329
SIMC1	-1.238799	0.007943174	0.04723101
PLEKHO2	-1.238658	0.000822203	0.008501391
OAZ2	-1.238281	0.001112299	0.010788412
OSTM1	-1.238276	1.60E-05	0.000335915
NFKB2	-1.237952	0.001510653	0.013675775
KCTD1	-1.237938	0.000391816	0.004811984
GTF2A2	-1.236986	3.72E-05	0.000679966
SEC24A	-1.236943	0.000843217	0.008693287
TNRC6C	-1.236093	0.007970003	0.047319462
PTPRS	-1.23609	0.008279103	0.048451186
FAF2	-1.236016	2.53E-06	6.68E-05
NUFIP1	-1.235968	0.002354858	0.019263994
ETV5	-1.235599	8.58E-05	0.001385045
TRRAP	-1.235413	0.001784895	0.015598949
GABRA3	-1.235105	0.000170413	0.002425343
SLC30A1	-1.235054	0.000173817	0.002456031
EMSY	-1.234974	0.000799936	0.008379041
ZNF276	-1.234966	0.007210024	0.044142692
TANC2	-1.234962	0.001044076	0.010245835
SPEN	-1.234678	0.001475787	0.013408236
KLHL11	-1.234533	2.56E-05	0.000497957
CCDC117	-1.234127	0.000153015	0.002218492
KPNA4	-1.234025	5.33E-05	0.000916431
DYNC1LI2	-1.232837	1.86E-06	5.08E-05
ABHD17B	-1.232427	9.84E-05	0.001547526
C2CD3	-1.232189	0.001016142	0.010033016
JCAD	-1.232101	0.000592085	0.006634565
SPRYD7	-1.232057	0.000598613	0.006697335
SKIL	-1.232029	0.000459473	0.005448472
CEP97	-1.231754	0.000376154	0.00464654
PDE4D	-1.231549	0.007075406	0.043595479
STX16	-1.231224	0.001874526	0.01619622
SPPL3	-1.23082	0.007017136	0.043347309
EML4	-1.23081	7.43E-06	0.000170682
MTA1	-1.230634	0.0015537	0.014001706
HIVEP2	-1.230075	0.000200257	0.002775374
ENC1	-1.229992	8.05E-07	2.40E-05
ABCA3	-1.229744	0.001628965	0.014505102
CTSB	-1.229642	6.98E-05	0.001157428
PHC3	-1.229389	0.000804618	0.008409801
OSBP	-1.22931	0.000144835	0.002116479
RHBDD1	-1.22929	0.00044836	0.005347391
GPATCH8	-1.229207	0.002871464	0.022437746
RAB27B	-1.228418	0.001060953	0.010390293
FTH1	-1.228348	9.41E-05	0.001493155
LYPLA1	-1.228067	7.23E-05	0.001196387
SRPRA	-1.227806	0.000161841	0.002330093
AGPAT1	-1.227761	0.004345677	0.030612454
PAK2	-1.227574	0.000628389	0.006969708
ANKRD13A	-1.227557	0.000232788	0.003141881
HSP90AA1	-1.227427	0.002197408	0.018291259
HMG20A	-1.227157	2.82E-05	0.000541385
GNL3L	-1.226532	0.001313373	0.012208883
CCDC162P	-1.226275	0.003309694	0.024969535
TAF15	-1.225623	0.003622169	0.026699873
SMAD5	-1.225456	0.000257434	0.003413952
RAB11FIP3	-1.225364	0.002804995	0.022059959
FAM193A	-1.225148	0.004413633	0.030925383
MAPK9	-1.225001	1.48E-05	0.000313318
TROAP	-1.224382	0.001078141	0.010530083
DSCC1	-1.223902	3.47E-05	0.000646657
MKI67	-1.223307	0.002251227	0.018588605
FLOT1	-1.223274	1.75E-05	0.000361389
ND2	-1.222789	0.007806007	0.046626377
PSAP	-1.222492	6.69E-06	0.000157287
APBB2	-1.222265	3.41E-05	0.000636571
FCHSD2	-1.222194	0.001819789	0.015836875
ARHGAP17	-1.222012	0.005476428	0.036079898
MMGT1	-1.221602	0.000372682	0.004620172
LEPROTL1	-1.221399	0.001927321	0.01652398
HCG18	-1.221084	0.000357471	0.004469936
TMEM248	-1.220909	1.45E-05	0.00030832
ZFP36L2	-1.220906	0.004671313	0.032184857
SLC10A7	-1.220801	0.004406977	0.03090849
ARL17A	-1.220519	0.005226061	0.034850095
C12orf45	-1.220381	0.000641592	0.007084955
DLC1	-1.219928	0.000565006	0.006405621
SH3D21	-1.219776	0.003184051	0.024326353
DROSHA	-1.219513	0.001718244	0.01511887
SPRED1	-1.219488	0.000429616	0.005175081
SCYL1	-1.219296	3.21E-05	0.000605897
GTSE1	-1.219174	0.003159682	0.024197066
VAV2	-1.21914	0.001222695	0.011620026
STYX	-1.218616	0.000662492	0.007265798
GAN	-1.218345	0.000167084	0.002386557
ABLIM1	-1.217796	0.000277318	0.003640897
GNAQ	-1.21671	4.90E-05	0.000855408
HS2ST1	-1.216351	0.000418848	0.005079232
RSPH3	-1.216224	0.000470656	0.005540451
DYNC1I1	-1.216188	0.003064367	0.023573935
REEP5	-1.216132	0.000172114	0.002443924
NFATC2	-1.215954	0.007950856	0.047237824
KIAA1841	-1.215286	0.008626042	0.049835908
SLC7A1	-1.215181	0.003283356	0.024809678
LOC150776	-1.215146	0.002756892	0.021728936
MYCBP	-1.215135	0.000792	0.008302627
MANEA	-1.215111	0.005929961	0.038181553
AHNAK2	-1.215105	0.001232083	0.011691425
NQO1	-1.214724	0.000173548	0.00245463
WWC1	-1.214577	8.19E-06	0.00018516
RNF103	-1.214188	0.000923464	0.009295734
UBALD2	-1.21397	0.004070461	0.029258337
YWHAH	-1.213886	2.54E-05	0.000494473
SMPD4	-1.213881	0.000193707	0.002702737
ZBTB26	-1.213852	0.006600214	0.041337127
RHOBTB3	-1.213798	4.71E-05	0.00082783
C5orf22	-1.213389	0.001008069	0.009980572
ITSN2	-1.213224	0.000139191	0.002042646
CAPN1	-1.212991	1.85E-05	0.0003781
LPP	-1.212915	0.001208134	0.011520843
RAF1	-1.212096	1.85E-05	0.0003781
CCDC57	-1.212006	0.006884883	0.04271241
CLIC4	-1.211992	3.62E-05	0.000667297
RANBP9	-1.211806	0.000135843	0.002005731
GAB2	-1.211749	0.000491722	0.005722902
GNB1	-1.211247	3.67E-05	0.00067345
BRPF3	-1.21106	0.00588083	0.037949729
B3GNT5	-1.211016	0.002579521	0.020646164
ERC1	-1.211008	0.001163756	0.011214731
ERBIN	-1.210937	8.27E-05	0.001344768
DGKD	-1.210816	0.000404972	0.004935809
CS	-1.210658	0.001678981	0.014852921
LMAN2L	-1.21051	0.000857485	0.00879698
GNAS	-1.210067	0.001171112	0.011278093
DIAPH3	-1.209985	0.000422567	0.005115752
MAK16	-1.20997	0.000243036	0.00325587
HNRNPD	-1.209775	0.001273672	0.011978174
GXYLT1	-1.209661	0.006570313	0.041185549
DIAPH1	-1.20912	0.002994342	0.023174853
TMC5	-1.20868	0.00626306	0.039812366
UVSSA	-1.208297	0.003718266	0.027200166
COBL	-1.208109	0.001221461	0.011615937
AKAP12	-1.207917	7.28E-06	0.000167728
MED13L	-1.207685	0.000655784	0.00720864
FAM214A	-1.207592	0.00380078	0.027691672
FOSL2	-1.207393	0.000817559	0.008471547
STK36	-1.207245	0.003508959	0.026134136
ZBTB4	-1.206877	0.001406257	0.012889945
GOLGA7	-1.206835	0.000100582	0.001575201
BIRC3	-1.206626	0.003111069	0.023895059
ZADH2	-1.20659	0.000553666	0.006306727
HDGFL2	-1.206558	0.003162987	0.024203801
INO80D	-1.206288	0.00338872	0.025459434
CERT1	-1.206249	0.000593187	0.006641767
ATRAID	-1.206108	0.000567391	0.006427613
PCNX2	-1.205997	0.002383945	0.019457889
BEND3	-1.205989	0.000711061	0.007659002
PODXL	-1.205645	0.002171458	0.018112189
TRMT1L	-1.205531	0.000443709	0.00530506
CHST11	-1.205505	0.000563863	0.006397675
LCLAT1	-1.205348	0.003251381	0.024668975
MYBL1	-1.205291	0.003605796	0.026619907
A4GALT	-1.205216	7.72E-05	0.001265339
IFT172	-1.205098	0.00174797	0.015331859
AFF1	-1.204811	0.003444885	0.025800939
PMEPA1	-1.204791	0.000122122	0.001838823
WBP11	-1.204784	0.001456126	0.013279681
SCARB1	-1.204632	0.007826695	0.046678817
CDX2	-1.204595	0.004165821	0.029736763
ELMOD2	-1.204549	0.007663369	0.045964315
ARHGEF4	-1.204351	0.007899653	0.047010901
LATS1	-1.20423	0.007101353	0.043643731
TRIM8	-1.204155	0.003599508	0.026587069
ZNF616	-1.20384	0.000601637	0.006717012
TARDBP	-1.203601	0.000679544	0.00740291
SH3TC2	-1.203545	0.000224786	0.003050974
GSK3B	-1.20337	0.002322147	0.019050305
TMEM189	-1.203313	0.000352021	0.004417063
FBXL17	-1.203161	0.007849066	0.04678691
CYP1B1	-1.202837	0.000481687	0.005651615
DYNC1I2	-1.20264	0.000228713	0.003092657
PIK3CA	-1.202514	0.001123769	0.010858345
SERTAD2	-1.202477	0.003980339	0.028753521
FAM83H-AS1	-1.202429	0.004444142	0.031068595
NET1	-1.202401	5.48E-05	0.000939731
YTHDF1	-1.202383	0.002682779	0.02124908
GANAB	-1.201466	0.007869819	0.046871954
DNAJC21	-1.201375	0.001282442	0.012014063
DSG2	-1.20113	0.000403358	0.00492444
LOC284454	-1.200992	0.004217823	0.029952223
ZNF532	-1.200103	0.00024303	0.00325587
CCND1	-1.200054	5.85E-05	0.000992982
KIF13B	-1.200008	0.008497394	0.049329249
NAV3	-1.199671	0.001579518	0.014181327
SPOPL	-1.199432	0.001641078	0.014576318
CDC42BPB	-1.198309	0.005686206	0.03704106
THEM4	-1.197591	0.007987181	0.047356319
RAPH1	-1.197498	0.001759776	0.015416704
INCENP	-1.197474	0.000324207	0.004139941
TSPYL1	-1.197457	0.00038875	0.004778385
EVPL	-1.19728	0.008125704	0.04784401
CHAF1A	-1.197236	0.003020728	0.023350068
DCAF12	-1.197006	0.000749632	0.007973458
YOD1	-1.196753	0.001116319	0.010800797
FBXO33	-1.19666	0.005075078	0.034216537
IGF2BP2	-1.196107	0.004772447	0.032694653
RNF138	-1.196099	0.007484704	0.045223026
NIPAL1	-1.196096	0.005496162	0.036112282
PPP1R14B	-1.196033	0.002251722	0.018588605
TULP4	-1.195516	0.005066809	0.034207721
CDC25B	-1.195467	0.005817995	0.037635882
ID1	-1.195004	0.004218798	0.029952223
ATRX	-1.194944	0.002132243	0.017867581
SH3PXD2B	-1.194258	0.00337479	0.025367964
CELF1	-1.194022	0.000506645	0.005848218
ATL2	-1.19373	0.000427943	0.005163533
SFXN3	-1.19321	0.004829573	0.03297661
GTF3C4	-1.193189	0.00156416	0.014087181
DTL	-1.193097	0.000253492	0.003374056
SHCBP1	-1.193062	0.000428371	0.005164385
STRN	-1.192868	0.000344164	0.004344879
DHX36	-1.192614	0.005705294	0.037115224
RAD54L	-1.192558	0.002535218	0.020370261
ZMYM3	-1.192498	0.001232635	0.011691425
CDC14A	-1.192409	0.004230845	0.030023006
CAPZB	-1.192286	0.000247341	0.003304353
GPHN	-1.192077	0.005545072	0.036307773
MFSD11	-1.191981	0.00102152	0.010065487
ZNF702P	-1.191676	0.003959154	0.028672132
TAB3	-1.191649	0.006137148	0.03920127
CTTNBP2NL	-1.191483	0.000654514	0.007200157
RALGPS2	-1.191343	0.002008376	0.017037014
GPR107	-1.191306	0.001657228	0.014696464
NOL8	-1.191205	0.000552466	0.006298031
CPSF7	-1.190933	0.006772627	0.042197555
BTBD7	-1.190544	0.001016128	0.010033016
PSME4	-1.19036	0.001275296	0.011978174
DPY19L4	-1.189823	0.000872495	0.008925627
RAD51D	-1.189128	0.002292462	0.018871033
STAU1	-1.189024	0.000965407	0.009630754
HTT	-1.188946	0.005563011	0.03638612
SLAIN2	-1.188697	0.002854038	0.022384764
TADA3	-1.18822	0.003807715	0.027728221
GM2A	-1.188022	0.000685935	0.007466263
ZNF860	-1.187565	0.004157957	0.029695294
SSX2IP	-1.18743	0.000693088	0.007527112
TMEM67	-1.187393	0.004391089	0.030827191
NT5DC3	-1.187178	0.006821824	0.042454008
CASC3	-1.18696	0.005656273	0.036897499
SNRNP200	-1.186856	0.008296723	0.048534655
CLASP1	-1.186109	0.001264752	0.011917859
LMTK2	-1.185985	0.001867364	0.016153646
PCNX4	-1.18594	0.001205989	0.011514246
HELZ	-1.185803	0.006024951	0.038655425
CHMP4B	-1.185676	0.000808353	0.008424471
RCOR1	-1.184761	0.001372663	0.012642294
TTC7B	-1.184749	0.00436626	0.030712546
RTF1	-1.184677	0.003346901	0.025184515
TICRR	-1.184581	0.00226169	0.018649589
HOOK1	-1.184229	0.005087293	0.034250961
H2AX	-1.184033	0.008643272	0.049915502
ID2	-1.183712	0.000786285	0.008272012
UBA6	-1.183177	0.001911861	0.016451123
RAD21	-1.182845	0.000255677	0.00339377
MAP3K6	-1.182015	0.001947019	0.016653348
ZNRF3	-1.181569	0.003288376	0.024834627
CKS1B	-1.18147	0.002993372	0.023174853
TTC19	-1.181426	0.000291617	0.003794171
EPM2AIP1	-1.181383	0.001970184	0.016791873
SLC20A1	-1.181247	0.000477485	0.005615988
NPEPPS	-1.180779	0.001630549	0.014505102
NAA25	-1.180628	0.000736326	0.007866657
USP54	-1.180495	0.003577293	0.026463549
ATAD5	-1.180425	0.008010003	0.047433262
ACO1	-1.180289	0.001826037	0.01588169
SCYL2	-1.180215	0.000529125	0.006060622
CDCA3	-1.179987	0.002561439	0.020546952
DLEU2	-1.179441	0.008613934	0.049790301
FAXC	-1.179078	0.007251317	0.044216453
IFNAR1	-1.179028	0.007596804	0.045790388
CARD11	-1.178955	0.003102752	0.02384385
SORL1	-1.178878	0.000133501	0.001975179
ARHGAP29	-1.178718	0.001287136	0.012034241
PDIK1L	-1.178714	0.006155408	0.039283188
VCL	-1.178637	0.000576854	0.006509308
FAM160B1	-1.178326	0.000821887	0.008501391
GBF1	-1.178204	0.004778347	0.03270452
TUBGCP4	-1.177333	0.004372652	0.030714225
CACHD1	-1.177289	0.006126417	0.039150028
TMTC4	-1.176762	0.006247974	0.039751085
LTO1	-1.176341	0.007432241	0.045026421
SERINC5	-1.175899	0.005453189	0.035993538
KIAA1958	-1.175656	0.006213489	0.03959372
PRPF8	-1.175617	0.007603553	0.045790388
PLXNB2	-1.175539	0.002538003	0.020370261
TOR1AIP2	-1.175513	0.001512535	0.01368191
UNC119B	-1.175443	0.001240718	0.01175267
AOPEP	-1.174544	0.002720334	0.021499413
TMOD3	-1.174481	0.001031825	0.010139386
PALLD	-1.174203	0.001413537	0.012940268
RNF145	-1.173965	0.000457372	0.005431425
KDM2A	-1.173582	0.004000144	0.028867739
UBTD2	-1.173364	0.005704326	0.037115224
E2F3	-1.17321	0.004202177	0.029910658
ELAVL1	-1.17316	0.002245957	0.018562212
KRT6C	-1.173059	0.003539158	0.026275565
CASK	-1.172941	0.005910164	0.038088015
PRR14L	-1.172529	0.001567778	0.01411098
CDCA7	-1.172504	0.004592155	0.031806231
FYN	-1.1723	0.002754562	0.021722422
AHNAK	-1.172168	0.001119224	0.01082166
CNIH1	-1.171787	0.001445849	0.01320262
PIGQ	-1.171504	0.006078309	0.038928647
FRAS1	-1.171216	0.006756524	0.042121915
KPNA1	-1.171181	0.001606852	0.014337682
CLASP2	-1.170936	0.000379143	0.004672222
RUSC1	-1.170893	0.007113819	0.043701763
CAMSAP1	-1.170591	0.000868783	0.008893946
NOL10	-1.170356	0.002289864	0.01886039
KNL1	-1.170094	0.002035784	0.017198861
PIGM	-1.169797	0.006089669	0.03898413
ERMP1	-1.169244	0.00260092	0.020737061
MARCHF5	-1.169153	0.00472895	0.032502797
NAT10	-1.168516	0.002200665	0.018291259
PON2	-1.168404	0.003012353	0.023297788
TMEM181	-1.167954	0.001394505	0.012798455
KRT6A	-1.167691	0.000911121	0.009197105
MTCL1	-1.167247	0.00302413	0.023351387
HSD17B12	-1.167186	0.001930714	0.016543258
AGPS	-1.166712	0.002515663	0.020248283
USP7	-1.165848	0.004087307	0.029335665
WDR26	-1.165797	0.004353611	0.030653409
USP34	-1.165262	0.003521857	0.026200946
IMPAD1	-1.165122	0.002587811	0.020688882
PIKFYVE	-1.164998	0.005548521	0.036307773
ITPRID2	-1.16429	0.000805926	0.008414521
KLF13	-1.163213	0.005534752	0.036266929
ADNP	-1.163099	0.00586047	0.037852144
FAM120AOS	-1.162988	0.001791658	0.015648591
SYNM	-1.162894	0.005144834	0.034477785
MPZL1	-1.162799	0.000441066	0.005286572
GMFB	-1.162569	0.007260142	0.044243401
TPD52	-1.162493	0.005042979	0.034095535
MYO5A	-1.162488	0.005155403	0.034516603
ZC3H7A	-1.162264	0.004126727	0.02954524
MDM2	-1.16208	0.002426171	0.019724576
SCRN1	-1.162023	0.000730649	0.007829159
SEC24B	-1.161482	0.003236007	0.024580386
SEC14L1	-1.16124	0.005789749	0.037529517
RNF130	-1.161074	0.004004777	0.028886751
SMAD2	-1.160521	0.004060334	0.029200065
RAB3IP	-1.16046	0.003708333	0.027141244
ARHGEF39	-1.160242	0.001721377	0.01511887
TMPRSS4	-1.160048	0.002237999	0.018507023
TTF2	-1.159956	0.001794653	0.015665282
ASXL1	-1.159872	0.004501581	0.031359205
MDN1	-1.159824	0.000881698	0.008981638
PIK3C2A	-1.15922	0.007649937	0.045921858
TET2	-1.158762	0.002592633	0.020705251
ERI2	-1.158146	0.005969446	0.038384492
NKRF	-1.1575	0.007347803	0.044627099
ERI1	-1.157225	0.002725923	0.021531814
GOPC	-1.156418	0.002747901	0.021681722
CNOT1	-1.156152	0.002404567	0.019604072
HPS4	-1.15612	0.005982915	0.038453995
SLC39A10	-1.156028	0.007241443	0.044216453
FOS	-1.155861	0.006482563	0.040794707
ABCE1	-1.155666	0.003023606	0.023351387
EFCAB14	-1.155337	0.00604029	0.038702303
OTULIN	-1.155243	0.004336946	0.030580759
PBX1	-1.155037	0.008005429	0.047425605
EXTL2	-1.155023	0.007609847	0.045790388
IDS	-1.154687	0.003677374	0.026982967
DHTKD1	-1.154237	0.001248305	0.011809063
NOTCH2	-1.154165	0.002990953	0.023174853
THSD4	-1.153706	0.008143839	0.047892265
TLN2	-1.153635	0.004034141	0.029045358
RABGEF1	-1.15343	0.006962078	0.043117751
SON	-1.153264	0.00485929	0.033116942
PRDX3	-1.153044	0.006822598	0.042454008
YIPF4	-1.152515	0.004767021	0.032688465
TRIM24	-1.152069	0.00444479	0.031068595
EIF4G1	-1.151909	0.005316155	0.035233844
UBE4A	-1.151103	0.004528453	0.031470574
VEZF1	-1.150786	0.003742582	0.027350365
TMED8	-1.150603	0.004527391	0.031470574
TNS3	-1.150498	0.004207987	0.029934278
SHROOM3	-1.150341	0.007639982	0.045881152
CTNNA1	-1.150301	0.001882237	0.016224054
GPAT3	-1.150262	0.006966125	0.043124343
PRKD3	-1.150043	0.003069011	0.023597106
CTPS1	-1.14945	0.00610219	0.039046991
DAZAP2	-1.149153	0.003909979	0.02835863
AGFG1	-1.149119	0.005766368	0.037411514
CTNND1	-1.148942	0.004954287	0.033630922
AAGAB	-1.147668	0.003699265	0.027111397
HACD2	-1.147586	0.004734899	0.032502797
UBASH3B	-1.146771	0.002318527	0.019042223
RNF43	-1.146665	0.008328839	0.048683126
FAM168B	-1.146427	0.00343858	0.025767066
KHDRBS1	-1.145711	0.008013966	0.047437296
NEMP1	-1.144597	0.004017088	0.028961098
EXOC6	-1.142905	0.007091979	0.043641788
S100A10	-1.142844	0.00539295	0.035661066
ARHGAP19	-1.141846	0.007438059	0.045042793
NFRKB	-1.141778	0.004155447	0.029692037
RAB22A	-1.140759	0.006215023	0.03959372
SYNCRIP	-1.140137	0.008164243	0.047962365
NUDT4	-1.140009	0.008393394	0.048882556
VSIG10	-1.13948	0.004458764	0.031135955
HNRNPAB	-1.139125	0.007078523	0.043596102
SNX5	-1.13762	0.007224931	0.044189764
TPX2	-1.136159	0.003232785	0.024568823
EIF1	-1.135537	0.007229687	0.044189764
RBFOX2	-1.135403	0.006757573	0.042121915
SMURF2	-1.135395	0.00565651	0.036897499
MPP7	-1.134824	0.005046608	0.034104122
IPO9	-1.134236	0.004536984	0.031514707
EFR3A	-1.133988	0.008354506	0.048773986
NCKAP1	-1.133763	0.00661351	0.041402463
FARSB	-1.13095	0.006986144	0.043192618
FERMT1	-1.128922	0.008450527	0.049096611
RRP1B	-1.128286	0.008361512	0.048775486
CLIP1	-1.125238	0.00631411	0.040021983
HYOU1	1.122015	0.006500532	0.040872201
SMS	1.124452	0.007860169	0.046833779
DCBLD2	1.129537	0.006308126	0.040010515
NONO	1.129614	0.007804298	0.046626377
RSRC2	1.129775	0.008480814	0.049252778
FTL	1.130763	0.005281468	0.035148995
RNF149	1.130876	0.006403133	0.040400388
SERINC3	1.131113	0.006650973	0.041600958
SNW1	1.131659	0.00841956	0.048956052
NOP9	1.132098	0.008165713	0.047962365
CGAS	1.132434	0.007973338	0.047319462
PPIB	1.133667	0.006221451	0.039617215
FKBP10	1.133997	0.005910044	0.038088015
ERCC3	1.134041	0.007519552	0.045365246
LGR4	1.135916	0.005750981	0.037345205
DHX8	1.136371	0.008062965	0.047649291
MTF2	1.13844	0.007783933	0.04653298
MESD	1.13849	0.00419176	0.029862932
DUSP16	1.138838	0.007198379	0.044108764
MOGS	1.139333	0.005424646	0.035837867
GPR180	1.139487	0.007606544	0.045790388
DHCR7	1.139881	0.006116448	0.03912091
RAB18	1.139927	0.008130854	0.047854841
RNF19A	1.140223	0.00532529	0.035253165
HEATR5B	1.140645	0.004662126	0.032167557
MAEA	1.141774	0.008043841	0.047594646
LPIN1	1.142172	0.008107842	0.047797248
PPIF	1.142685	0.00631729	0.040021983
ST14	1.143704	0.005185365	0.034669036
EIF4A3	1.144467	0.004630317	0.031993895
FBXO21	1.144567	0.004429854	0.031008976
SLC35E1	1.144828	0.005031529	0.034049975
ZNF263	1.14498	0.008070872	0.047676522
EMC4	1.145008	0.007815213	0.046642817
TTC27	1.145251	0.003113275	0.023899306
BRAP	1.145428	0.00818014	0.048027588
NELFCD	1.14562	0.00350926	0.026134136
COPB2	1.146145	0.005485363	0.036090541
LAPTM4B	1.146407	0.007769611	0.046466578
PSEN1	1.147024	0.003491518	0.026055698
ARHGAP12	1.147024	0.004944859	0.033605046
TMEM50A	1.147142	0.004847341	0.03305109
ARAP2	1.147384	0.008614704	0.049790301
SFXN4	1.147641	0.007074977	0.043595479
SPDL1	1.147722	0.007619746	0.045797681
SDC4	1.148082	0.000963122	0.009614588
SEC61A1	1.148302	0.001088709	0.010618951
NCBP2	1.148711	0.001914549	0.016463297
TRIM25	1.148759	0.00702499	0.04337729
MORC3	1.149096	0.008245072	0.048366162
ITGA2	1.149362	0.003538584	0.026275565
DAP3	1.149373	0.005947323	0.038271372
MFF	1.149678	0.007630707	0.045844504
STMN1	1.149728	0.003256618	0.024685066
RBM10	1.150022	0.004909344	0.033395091
ADNP2	1.150218	0.005172458	0.034598739
RAD23B	1.150337	0.00185882	0.016089364
LACTB	1.150581	0.00805792	0.047649291
MXRA7	1.150651	0.006778785	0.042217726
TMBIM1	1.150757	0.005806143	0.03760206
RBBP7	1.150948	0.003562141	0.026364952
CHD1L	1.151146	0.004517057	0.031422314
SLBP	1.151222	0.005434345	0.035885545
PSMA3	1.151239	0.002397314	0.01955597
GTF2A1	1.151509	0.006874881	0.042687457
SLC38A9	1.151511	0.006551395	0.04110261
FRMD8	1.151618	0.007073461	0.043595479
ZNF131	1.15162	0.003973244	0.028732722
ZNF426	1.151635	0.005159797	0.034530028
WASHC2C	1.151746	0.004955442	0.033630922
PTPRK	1.151985	0.002081263	0.017531849
TMED4	1.15202	0.005081416	0.034243292
ENY2	1.152396	0.008254539	0.048385791
PHF23	1.152424	0.00642808	0.040504747
TMEM14C	1.152543	0.004891542	0.033305342
TINAGL1	1.152552	0.007322368	0.04454749
ZNF697	1.152666	0.004566363	0.031664939
ABL2	1.152907	0.004733541	0.032502797
HMGN2	1.153091	0.000848428	0.008717314
LONP1	1.153216	0.005103161	0.03427797
RNF34	1.153508	0.006380932	0.040281829
USP33	1.153754	0.003766985	0.027514787
SHC1	1.153779	0.001394277	0.012798455
STRIP1	1.153786	0.005652746	0.036897499
PFKL	1.154215	0.007158188	0.043925364
RRP1	1.154784	0.005664605	0.036933633
ITFG1	1.15502	0.007247914	0.044216453
SLC35F5	1.155089	0.002445435	0.019825439
C11orf95	1.155459	0.008372454	0.048799931
ASS1	1.155656	0.00686262	0.042629638
ATP6V0D1	1.155669	0.002608955	0.020789665
RNF139	1.155809	0.002775911	0.021855008
APLP2	1.155862	0.000933634	0.009372003
ALDH1A3	1.155935	0.003405072	0.025542461
RPL17	1.156094	0.007486593	0.045223026
MED23	1.156155	0.004234282	0.030032652
ATP6V1E1	1.156274	0.008060928	0.047649291
HNRNPH2	1.156518	0.001972773	0.016803874
CYB5B	1.156522	0.004330941	0.030553319
USP5	1.156654	0.005725495	0.037229884
PSRC1	1.156904	0.006688776	0.041783174
MACC1	1.157034	0.001693178	0.01496935
TMEM50B	1.157764	0.007606965	0.045790388
RAB25	1.157828	0.008117836	0.047817163
SNX29	1.158152	0.006623634	0.041447894
RETREG2	1.15822	0.004202597	0.029910658
AAMP	1.158457	0.002314142	0.019017008
GRHL1	1.158597	0.000725329	0.007783693
HARS2	1.159011	0.008079586	0.047704768
TM2D2	1.159083	0.0042982	0.030381651
CERCAM	1.159309	0.007452045	0.045108587
DESI2	1.159506	0.006124787	0.039150028
ZUP1	1.159904	0.006290792	0.039935614
SNHG15	1.16	0.005297821	0.035189517
IDH2	1.160402	0.008262055	0.0483906
ABHD12	1.160635	0.004955646	0.033630922
CLDN7	1.160688	0.007704614	0.046173383
SAP30L	1.160959	0.004341454	0.030597616
ATP10D	1.161249	0.003258941	0.024689725
VPS36	1.161333	0.002847751	0.022347576
BUD23	1.161494	0.004475497	0.031237717
IMPDH1	1.161633	0.008660739	0.0499964
SLC16A3	1.161734	0.007995001	0.04738325
LLGL1	1.162255	0.004040971	0.029075283
TLK2	1.162471	0.002807117	0.02206464
JPT1	1.162655	0.006518559	0.04095246
ZNF286A	1.162883	0.00530671	0.035189517
MTMR14	1.163014	0.005099709	0.03427797
MCUB	1.163014	0.005607791	0.036645851
MANBA	1.163057	0.001911995	0.016451123
ALDH9A1	1.163415	0.004585097	0.031772568
CDK1	1.163447	0.005216926	0.034815636
CLU	1.163634	0.005226911	0.034850095
TRAFD1	1.163783	0.002469561	0.019976223
SLC38A2	1.163832	0.001519648	0.013729069
LIMCH1	1.163928	0.006365995	0.040253921
EHD4	1.164044	0.000806234	0.008414521
ACSS1	1.164524	0.008406794	0.048921176
CD63	1.164547	0.005102449	0.03427797
ALAS1	1.164732	0.00370387	0.027122308
HSPD1	1.164735	0.000665725	0.007281172
OAT	1.165144	0.007615364	0.045790388
VPS33B	1.165174	0.006857104	0.04261369
RRN3	1.165237	0.003916627	0.028392597
ABHD16A	1.165495	0.003340653	0.025163702
KLHL22	1.165531	0.005870948	0.037902883
VPS16	1.16554	0.004146534	0.029643004
DNMT3B	1.165643	0.00090768	0.009168775
ESS2	1.165847	0.005690257	0.03705075
METRNL	1.165964	0.003992387	0.02882615
NUP133	1.166091	0.00387913	0.028187991
DDX54	1.166167	0.002740153	0.021632393
TNFAIP1	1.166176	0.001011446	0.010000307
NUDCD1	1.166811	0.00355778	0.026359666
POLR2G	1.166868	0.006735987	0.042023606
MAP3K4	1.166889	0.004313813	0.030447345
C9orf78	1.167174	0.001274497	0.011978174
SYNGR2	1.167294	0.002200036	0.018291259
PEX5	1.167436	0.006547532	0.041096213
SLC37A1	1.167509	0.007097704	0.043643731
GATAD1	1.167614	0.003945522	0.028587727
STX6	1.167659	0.001700657	0.015017103
HIC2	1.167767	0.003181266	0.024317923
ARNTL2	1.168095	0.001382231	0.012710019
ZC3HAV1	1.168144	0.000697844	0.007561725
DDX47	1.168268	0.007282946	0.04436367
COMMD2	1.168692	0.00426476	0.030189575
RRP8	1.168762	0.006189989	0.039486447
NOC3L	1.168833	0.004778412	0.03270452
PAQR7	1.169464	0.005132796	0.034422058
ARL1	1.169822	0.001528224	0.013789311
TOP1MT	1.169837	0.007229941	0.044189764
HS6ST1	1.169868	0.001960617	0.016739942
E2F6	1.170005	0.002460522	0.019936571
COX16	1.170051	0.008570036	0.049631359
NHP2	1.170194	0.005510217	0.036156941
ISCU	1.170308	0.004236646	0.03003468
MRPL32	1.170323	0.005629558	0.036771467
IL27RA	1.170557	0.0074708	0.045184275
SLC1A3	1.170776	0.002150998	0.017972647
PDIA6	1.170949	0.000895601	0.009084848
MGST3	1.17123	0.007748308	0.046377807
B4GALT5	1.17167	0.000753366	0.008001398
TBK1	1.171673	0.002356718	0.019268299
ALDH4A1	1.171675	0.008156167	0.04794526
GSTK1	1.171984	0.005035414	0.03406032
PHC2	1.172302	0.004753635	0.032612147
AZI2	1.172534	0.00510834	0.034281664
PELO	1.172594	0.007492764	0.045241399
CKS2	1.172987	0.006023109	0.038655425
PSMA2	1.17302	0.003267769	0.024730679
HSPE1	1.173229	0.001087272	0.010612095
GPBP1	1.173392	0.002118954	0.017787154
TADA2A	1.173414	0.007886751	0.046953454
HACD3	1.173582	0.000930874	0.009350784
JUNB	1.173586	0.005397935	0.035677707
SLC66A3	1.173623	0.005759753	0.037385378
SCP2	1.173787	0.001720664	0.01511887
ATP6V1G1	1.173895	0.00710061	0.043643731
DBR1	1.174057	0.005108454	0.034281664
TSEN34	1.174579	0.003062017	0.023573935
ARFGAP3	1.174699	0.000926263	0.009310939
ZNF200	1.174713	0.005677444	0.037000657
KYAT3	1.175037	0.005073288	0.034216537
NECTIN4	1.175075	0.001373117	0.012642294
OSTC	1.175203	0.002312185	0.019011736
LAMC2	1.175714	0.000376416	0.00464654
PIR	1.175883	0.005467721	0.036040088
NUP37	1.176072	0.008397664	0.048887732
ABT1	1.176332	0.002859565	0.022390751
STK38	1.176463	0.000430644	0.005183149
ZCRB1	1.176483	0.005005905	0.033892439
ZNF600	1.176575	0.002564836	0.020562789
TM7SF3	1.176618	0.002930875	0.022801826
NDUFA9	1.176774	0.004312466	0.030447345
MED8	1.176868	0.002911746	0.022665208
KIFC2	1.176885	0.002859651	0.022390751
VIPAS39	1.176948	0.00421121	0.029937838
PGAP6	1.176979	0.000586001	0.006584661
GFM2	1.177207	0.003646972	0.026841639
ZNF277	1.177411	0.008116622	0.047817163
AQP3	1.177503	0.001851857	0.016057945
TAF8	1.17777	0.001813694	0.015793343
NDFIP2	1.178049	0.000533703	0.006103382
MFAP1	1.178111	0.001364252	0.012599765
HEATR3	1.178332	0.006421204	0.040479067
CLN5	1.178396	0.005462803	0.036040088
GPX1	1.178475	0.004133518	0.029574819
VPS25	1.178975	0.001992171	0.016939315
DBI	1.179	0.003506034	0.026134136
RAB3GAP1	1.179002	0.0007145	0.007690319
FAM50A	1.179208	0.002579138	0.020646164
HEXB	1.179467	0.000665135	0.007281172
GAS5	1.179575	0.003451282	0.025822093
RPP25	1.179715	0.003776315	0.02754119
LGALS8	1.17983	0.000676008	0.007374868
C16orf70	1.179861	0.002003309	0.017020314
JOSD1	1.179956	0.001287926	0.012034241
BBS2	1.180062	0.003244814	0.024634342
SLC5A6	1.180226	0.000219042	0.002981406
ECI2	1.180228	0.005325659	0.035253165
HES2	1.180279	0.007047614	0.043498401
PDXDC1	1.180652	0.000124319	0.001863745
ACAD8	1.180682	0.002910333	0.022665208
DEGS1	1.180734	0.002409743	0.01962413
BLCAP	1.180748	0.000641465	0.007084955
NAP1L1	1.180809	0.000691679	0.007517457
SH3TC1	1.180871	0.003047597	0.02349494
SAP18	1.1809	0.003591536	0.026555318
RCBTB1	1.180923	0.004177189	0.029773802
CASP3	1.180937	0.004252158	0.030129874
CCDC50	1.180947	0.001333601	0.012373047
USP28	1.181115	0.000254919	0.003386819
NSMCE3	1.181133	0.008560414	0.049615389
TMX4	1.181162	0.002479692	0.020035747
ZMAT2	1.181285	0.003252789	0.024668975
CHMP3	1.181322	0.000360989	0.004494483
KIF16B	1.181503	0.005815585	0.037635882
RPUSD3	1.181515	0.005490024	0.036104779
NOP53	1.181634	0.006003327	0.038550908
EIF2S2	1.181813	0.001362761	0.012595083
TAF12	1.181877	0.005298142	0.035189517
CCDC115	1.181972	0.003550494	0.026332682
ZNF644	1.182296	0.000954464	0.009534745
VPS18	1.182413	0.001473089	0.013392137
LYPD5	1.182444	0.005301886	0.035189517
SETX	1.182553	0.000585046	0.006581202
RCC1L	1.182598	0.00397779	0.028749479
PRAME	1.18261	0.004372873	0.030714225
PDCD10	1.182756	0.001307781	0.012172555
TTC38	1.182794	0.004865137	0.033141167
CDC40	1.182795	0.000904918	0.009147266
PPIC	1.182984	0.00160232	0.014330338
RNASET2	1.182987	0.008530148	0.049459803
CBR1	1.18306	0.001973918	0.016803874
MED7	1.183133	0.005493934	0.036112282
DSE	1.18339	0.000896547	0.009088066
MTERF3	1.18348	0.002111491	0.017734808
SH3BP5	1.183707	0.006913724	0.042855007
PYURF	1.183762	0.003791402	0.027637277
GPN3	1.18382	0.005093219	0.03427295
EPHA4	1.183999	0.002443819	0.019823462
JDP2	1.184152	0.002406635	0.019609872
MRPL39	1.184262	0.008522578	0.049455587
SIAH2	1.184413	0.001238719	0.011741431
EMC3	1.184435	0.004729762	0.032502797
PDIA4	1.184697	0.00025181	0.003354759
PPM1K	1.185033	0.00293413	0.022814875
OLR1	1.185054	4.72E-05	0.000828033
ALDH16A1	1.185184	0.001173922	0.011296858
ZNF189	1.18519	0.001392927	0.012798455
ABHD8	1.185341	0.006732862	0.042023606
RHOT1	1.185821	0.000757728	0.008035917
HSBP1	1.185909	0.002521693	0.020273125
CALU	1.185913	0.000179228	0.00252755
ARHGAP10	1.185978	0.001967817	0.016791498
RSL24D1	1.18599	0.003774517	0.02754119
EMC8	1.185998	0.003638011	0.026802985
MRPS26	1.186114	0.00421263	0.029937838
TM2D3	1.186537	0.00087618	0.008931723
TMEM144	1.186675	0.008084065	0.047704768
ZNF136	1.187169	0.007072113	0.043595479
ACOT13	1.187365	0.005326386	0.035253165
GTF2H2	1.187603	0.002517265	0.020248787
MRPL44	1.187889	0.001572289	0.014130701
SEMA4F	1.187984	0.004368844	0.030714225
JMJD6	1.188045	0.001958154	0.016728792
ANXA7	1.188436	0.000912597	0.009205574
PLEKHA8	1.18864	0.000704007	0.007611381
LACTB2	1.189278	0.006213538	0.03959372
ATG14	1.189323	0.001247243	0.011806741
NPC2	1.189367	0.00223318	0.018477744
PSMA6	1.189405	0.002896901	0.022573964
SUSD1	1.189517	0.000502004	0.005809821
NGLY1	1.189523	0.00037577	0.004646495
EXT2	1.189565	0.00050006	0.005796608
SNHG8	1.18957	0.007702084	0.046173383
AARS1	1.18995	0.001108239	0.010758624
FAM83G	1.189964	0.000574164	0.006489084
TTC1	1.190032	0.001630291	0.014505102
SERPINH1	1.190088	0.001037723	0.010190414
EIF4E2	1.190124	0.000995344	0.009874875
P2RX4	1.190219	0.001470353	0.013375678
ZNF219	1.190248	0.005194188	0.034695929
SLC35F2	1.190524	0.00015091	0.00219236
COPRS	1.190685	0.002421864	0.01971174
BAK1	1.190776	0.007134305	0.043808994
NDUFS5	1.19082	0.007249591	0.044216453
SELENOW	1.190837	0.003481248	0.025992479
DPP3	1.190966	0.00036399	0.004527945
PDE7A	1.191032	0.000864465	0.008856016
XPNPEP1	1.191118	0.001219549	0.011605384
ZNF18	1.19124	0.007475741	0.045195246
SUMO3	1.191337	0.00016236	0.002332913
CUTC	1.191427	0.005367001	0.035505721
CXorf38	1.191524	0.004286601	0.030314491
ZNF286B	1.191644	0.006592485	0.041306618
OMA1	1.191768	0.003346489	0.025184515
PDZD11	1.192104	0.003036333	0.023433102
TXN	1.19228	0.003526631	0.02622297
ZPR1	1.1925	0.000520068	0.005983935
ATP5F1E	1.192723	0.007660708	0.045964315
SPOP	1.192894	0.000836666	0.008638581
EEF1A1	1.192946	0.002201908	0.018291259
UBE2Q1	1.193084	0.000396062	0.004855872
TMEM9B	1.193084	0.000608216	0.006783764
CDKN1B	1.193152	0.000443145	0.005303052
ENOX2	1.193152	0.001988539	0.016918379
DDX18	1.193213	0.000421807	0.005110834
BNIPL	1.193588	0.008275017	0.048446891
MFSD1	1.193614	0.003276897	0.024786789
RNF8	1.193659	0.001312768	0.012208883
TCP11L1	1.193706	0.007325959	0.044550586
YIPF2	1.193754	0.005926871	0.03817866
PRDX1	1.193891	0.002431222	0.019754531
MITD1	1.194043	0.003870412	0.028142257
TMEM223	1.194101	0.006351957	0.040182732
KRT17	1.19411	0.00264196	0.021006341
RNF114	1.194232	8.26E-05	0.001344768
FNDC3A	1.194359	0.000491643	0.005722902
SLC52A2	1.194573	0.003552418	0.02633344
PRKAB1	1.194589	0.007760541	0.046431551
CLTB	1.195079	0.002766017	0.021788981
MINPP1	1.195183	0.004303133	0.030401656
GNPTG	1.195296	0.002958791	0.022969558
PEPD	1.195409	0.001662175	0.014722268
CALCOCO2	1.195496	0.000159952	0.002309799
NFS1	1.195525	0.000349936	0.004394719
SLC19A2	1.195577	0.000626209	0.006952262
GPATCH3	1.195815	0.003687327	0.027042266
GTPBP2	1.195858	0.000312465	0.004024531
MICU1	1.195932	0.001047456	0.010272035
CGN	1.195934	0.001140192	0.011002319
DHRS2	1.195997	8.51E-05	0.001376276
MOV10	1.196003	0.000165554	0.002369383
RPL7	1.196216	0.004770091	0.032694006
COG2	1.196513	0.000821218	0.008501391
ENPP4	1.196664	0.006433092	0.040518669
YEATS4	1.19669	0.001440356	0.013160778
SH3GLB2	1.19715	0.002376301	0.019406456
LAMP1	1.197196	0.000250275	0.003337382
PDE6D	1.197298	0.00436399	0.030711525
CAPG	1.197689	0.001878452	0.01622044
HDHD5	1.197986	0.000764364	0.008100349
CERS4	1.198432	0.004517161	0.031422314
CST3	1.198449	0.000968389	0.009652925
MVK	1.198497	0.006032399	0.038686035
CCT8	1.198505	0.001114281	0.010788412
C22orf39	1.199149	0.001834067	0.01594194
COL17A1	1.199188	0.000287447	0.00375343
KCTD11	1.199547	0.002257361	0.018624519
RPL39	1.199615	0.008085554	0.047704768
CHMP5	1.199737	0.001450521	0.013236917
ACSF2	1.200185	0.00052036	0.005983935
ILK	1.200422	0.000706888	0.007631114
ZNF823	1.20056	0.002014524	0.017060652
PKN1	1.20058	0.000272732	0.003583947
CDC25A	1.200655	0.000672991	0.007353054
RGPD8	1.200672	0.000851628	0.008743102
ATP6V0E2	1.200701	0.003670883	0.02696496
NAMPT	1.20076	0.000386184	0.004750882
SEMA4C	1.201159	0.000439212	0.005268724
DSTYK	1.201287	0.001604375	0.014333276
MIGA2	1.201525	0.002223756	0.018410305
SNX25	1.201573	0.002596949	0.020728271
TMEM147	1.201873	0.003138583	0.024068017
PHLDA3	1.201911	0.004906421	0.033390918
PISD	1.202095	0.000392936	0.004821644
REPIN1	1.202099	0.001092358	0.010647363
URGCP	1.202248	0.00078694	0.008272888
NXN	1.202325	0.000227368	0.00307758
ATP5MPL	1.202329	0.000888916	0.009036058
ARHGAP18	1.202577	0.001132207	0.010932571
MFN2	1.202657	1.94E-05	0.00039431
ZNF133	1.2027	0.003280184	0.024798673
KLF11	1.202768	0.004173624	0.029773802
ZNF165	1.203036	0.001510911	0.013675775
FBXO17	1.203302	0.008413088	0.048938104
DAZAP1	1.203425	0.001880792	0.01622127
HAGH	1.204052	0.003401101	0.025538337
POLR2K	1.204545	0.002423262	0.019712019
VPS26B	1.204832	0.000164745	0.002360152
NDUFV2	1.205075	0.00390912	0.02835863
EEF1A1P6	1.205099	0.008247844	0.048366162
RAMAC	1.20525	0.000924206	0.009296723
RGPD6	1.205538	0.000398045	0.004876054
WDR45	1.206013	0.006273563	0.039846949
MEIS3	1.206135	0.007363455	0.044703376
ZNF516	1.206215	0.002200428	0.018291259
FAM89A	1.206347	0.00235061	0.019240131
ARL2BP	1.206504	0.000221663	0.003014246
MED18	1.206814	0.004548927	0.031582487
DEDD2	1.206836	0.001102938	0.010721567
ZNF816	1.20684	0.002465101	0.019962483
RNF40	1.206931	2.92E-05	0.000556401
B3GALT6	1.207108	0.007216225	0.044161951
TEF	1.207197	0.00048804	0.005703003
DPH3	1.207519	0.001844868	0.016016556
AATF	1.208008	0.000340557	0.004314415
EXOC1	1.208465	0.000972258	0.009679054
ADI1	1.208539	8.74E-05	0.001406709
DAPP1	1.208587	0.001717396	0.01511887
RPS6KA4	1.208593	0.000525194	0.006025144
EPS8L1	1.208659	0.000968965	0.009652925
DNAJA1	1.208737	2.86E-05	0.000548362
YIPF3	1.208789	0.007919905	0.047112025
DNAJB2	1.208954	0.000108902	0.001673177
RAP1B	1.208979	4.56E-05	0.000804658
FGFR2	1.208988	0.000504618	0.005835401
APAF1	1.209318	0.004429242	0.031008976
EEF1A1P5	1.209385	0.002475394	0.020012206
LNPEP	1.209461	0.00048655	0.005694801
HMGB2	1.20953	0.00046274	0.005478219
ZFPM2-AS1	1.209565	0.005498786	0.036113106
ITM2C	1.209632	0.000147621	0.002148897
UBXN6	1.209651	0.003904064	0.028344168
BTG3	1.209658	0.000772663	0.008146491
CUTA	1.209752	0.00201528	0.017060652
MACROH2A1	1.209786	1.21E-05	0.000263185
EIF4A2	1.209838	0.000409027	0.004981034
ESRRA	1.209893	0.002038482	0.017211601
TNKS1BP1	1.209959	0.001969367	0.016791873
POLB	1.21001	0.004268101	0.030198436
RGPD5	1.21018	0.00034467	0.004345665
SLC39A11	1.210248	0.000937496	0.009404233
LIPA	1.210329	0.000136375	0.002009214
MPZL2	1.210336	4.44E-05	0.000788714
EZH1	1.210374	0.000710553	0.007659002
ZNF140	1.210447	0.000346719	0.004361897
HMGCL	1.21051	0.00354141	0.026278792
HSPA1B	1.210613	6.92E-05	0.001149339
INO80E	1.21102	0.001703471	0.01503277
GSN	1.21104	3.08E-05	0.000583263
ETS2	1.211118	0.000239934	0.003229796
STAP2	1.211358	0.001908617	0.016441629
TBC1D10A	1.211408	0.001803178	0.015720707
SLC39A7	1.211572	0.000186999	0.002624338
GIGYF1	1.2116	0.001250608	0.011823117
NOD1	1.211931	0.001269343	0.011953322
COPS7A	1.212122	0.001293894	0.012066605
DCBLD1	1.212214	0.000270325	0.003558793
CADM4	1.212372	0.002303929	0.018954636
ZBTB7B	1.212402	0.000144954	0.002116479
NECAP1	1.212729	0.000721933	0.007753008
PRSS8	1.213669	0.007713742	0.046208924
TNIP2	1.214004	0.0021446	0.017940488
CENPB	1.214101	0.003740829	0.027350365
GET3	1.214129	0.003159244	0.024197066
PLPP3	1.214169	0.000342763	0.00433098
ARNTL	1.214215	0.000848513	0.008717314
KRTCAP2	1.214367	0.007203011	0.044118439
DDIT4	1.214439	0.000196045	0.002722221
ZSWIM7	1.21458	0.006350931	0.040182732
P3H3	1.21503	0.005253423	0.034994573
JKAMP	1.215042	0.000495202	0.005744905
UNC45A	1.215316	0.000194529	0.002706363
PEF1	1.215388	0.000733255	0.007845451
TRAF5	1.215543	0.004665223	0.032173571
PSMA4	1.21574	0.00081331	0.008450746
MAGEF1	1.215751	0.000313119	0.004026817
NDUFA2	1.215841	0.002142513	0.017940488
ZCCHC17	1.216025	0.00028801	0.003756291
NBL1	1.216034	0.003652421	0.026868066
PITHD1	1.216445	0.000268623	0.003542829
TRIM68	1.216489	0.003315689	0.025001715
DEF8	1.216777	0.00121036	0.01153313
ACADS	1.216836	0.005593795	0.036570924
SEC22A	1.217409	0.000790094	0.008300009
ZNF680	1.21741	0.000559973	0.006365509
ZNF204P	1.217415	0.00402649	0.029014414
NRBF2	1.217597	0.000720518	0.00774356
HDHD3	1.217838	0.001114293	0.010788412
TIMM29	1.218463	0.001880026	0.01622127
COA6	1.218822	0.006407118	0.040407892
FNIP2	1.218954	0.000464244	0.005489203
FAM83F	1.218979	0.000586265	0.006584661
BID	1.219117	0.000360168	0.004488132
ZNF98	1.219319	0.007978803	0.047326054
TMEM41A	1.21938	0.000191205	0.002672982
RBSN	1.219389	2.96E-05	0.000563587
SAC3D1	1.219723	0.007949098	0.047237824
AMFR	1.219784	0.000249996	0.003336742
EGLN2	1.219926	0.001572902	0.014130701
VWA5A	1.219936	0.001635797	0.014542096
GEMIN2	1.219992	0.005510463	0.036156941
RAB33B	1.220188	0.002888656	0.022521859
METTL14	1.220531	6.03E-05	0.001018337
BLVRB	1.220593	0.00220305	0.018291259
LIPG	1.220639	0.00046886	0.005528034
GNB5	1.221283	5.51E-05	0.000943765
YIF1A	1.22167	0.000699499	0.007572842
ZNF257	1.222221	0.00136171	0.012593426
FBXO2	1.222248	0.005302334	0.035189517
TMEM126A	1.22234	0.00158454	0.014202161
SAR1A	1.222403	0.000112081	0.001713092
EPRS1	1.222424	4.73E-05	0.000829149
ZNF367	1.222486	2.62E-05	0.000507822
HERPUD1	1.222524	9.78E-05	0.00154195
SLC3A2	1.222793	3.56E-05	0.000659119
TSPAN9	1.222917	0.001274807	0.011978174
TJP3	1.223057	0.00305919	0.023571743
GPR108	1.223125	0.002104807	0.017699237
MICA	1.223195	0.005819176	0.037635882
TMEM115	1.223276	0.001925091	0.01652398
MRPL51	1.223387	0.000665909	0.007281172
ST13	1.223444	5.14E-06	0.000123687
PRRG4	1.22367	0.001498115	0.013576958
HSD17B4	1.224092	9.54E-05	0.001508386
TMED3	1.224155	9.38E-05	0.001491586
ZNF124	1.2255	0.000283394	0.003703856
PSMD14	1.225524	0.000355666	0.004455067
EGLN1	1.225545	3.79E-05	0.000690723
ADPRHL2	1.225586	0.001186026	0.011376246
EMC10	1.225839	0.000572488	0.006475209
TNFRSF10B	1.225896	6.63E-05	0.001108761
SLC25A10	1.22597	0.002831355	0.022230981
PPP1R9B	1.226104	0.000547549	0.006246897
IFI30	1.226293	0.000434211	0.005221726
TRIM65	1.226393	0.000624493	0.006943886
HDDC3	1.226406	0.000708389	0.007641619
VTI1B	1.226427	3.86E-05	0.000699595
RPARP-AS1	1.226865	0.000664778	0.007281172
PLIN3	1.226904	9.71E-05	0.001532963
IRF6	1.226916	1.78E-05	0.000367127
TMEM9	1.226932	0.000716415	0.007705188
PCGF1	1.22694	0.001721595	0.01511887
IST1	1.227302	2.97E-05	0.000564786
FPGT	1.227342	0.00032129	0.00410865
OAS3	1.227366	0.000679603	0.00740291
PRDX5	1.227625	0.000767348	0.008126021
APTX	1.227685	0.000137904	0.002027873
BTG1	1.227831	0.001351222	0.012522066
HPSE	1.228176	0.002441911	0.0198191
LOC729086	1.228183	0.003676525	0.026982967
TACSTD2	1.228193	1.72E-06	4.77E-05
TOMM5	1.228216	0.000695537	0.007542379
JUN	1.228549	0.000601766	0.006717012
FAM98A	1.229204	6.68E-05	0.001116752
OPN3	1.229442	0.001856143	0.016075821
ERRFI1	1.229486	4.30E-07	1.37E-05
NOCT	1.229538	0.000339707	0.00430743
DHRS13	1.229572	0.000369234	0.004589232
SUMF2	1.229701	4.62E-05	0.00081285
DYRK2	1.229868	9.61E-05	0.001518814
TBCCD1	1.230251	0.000145166	0.00211743
SP140L	1.230264	0.000102481	0.001598017
B4GALT3	1.230379	0.000873197	0.008926493
CDKN1A	1.230446	0.000119048	0.001800656
HHAT	1.230514	0.005831406	0.037681255
FLYWCH1	1.230793	0.000786188	0.008272012
DGKQ	1.230868	0.001104956	0.010733967
BCKDHA	1.231823	0.00137011	0.012638762
ZNF449	1.231998	0.00480946	0.032870328
TMEM101	1.23218	0.006518963	0.04095246
DENND11	1.232458	4.18E-05	0.000751382
IL1R1	1.232556	0.003613026	0.02665967
YIPF1	1.232944	0.00030768	0.003978103
ZNF112	1.232992	0.000455838	0.005418703
CYP1A1	1.233125	0.00065757	0.007222781
JAK2	1.233283	0.008336788	0.048709893
SMTN	1.233764	0.001737112	0.015245873
AMDHD2	1.23389	0.000108537	0.001672611
NCOA7	1.233917	0.000353838	0.004436015
HARS1	1.234083	3.27E-05	0.000615491
MFGE8	1.234278	0.006144988	0.03923401
PLEK2	1.234323	0.006886625	0.04271241
PIGH	1.234598	0.004111648	0.029470637
TRIP10	1.234734	0.000344827	0.004345665
PFKFB4	1.23479	3.66E-05	0.000672307
IPMK	1.235063	0.001031386	0.010139386
MED20	1.235118	0.000217392	0.002967333
MGAT2	1.235196	0.000337703	0.004293317
HSPA1A	1.23541	4.37E-05	0.000778604
SERPINB1	1.235544	0.000282652	0.003699982
MARS1	1.235658	4.15E-06	0.000102973
KHNYN	1.236049	1.73E-06	4.79E-05
INSR	1.236303	0.001174623	0.011296858
PGM3	1.236497	5.55E-05	0.000947702
USPL1	1.236605	6.00E-05	0.001015152
MET	1.236743	6.79E-06	0.000159225
STX18	1.237185	0.000874845	0.008931723
MFSD12	1.237248	0.001062643	0.010392759
PRPF4	1.237421	2.28E-05	0.000451626
TMEM87B	1.23749	3.54E-05	0.000657451
CRYZ	1.238284	8.44E-05	0.001367257
DECR1	1.238646	0.000102348	0.001597675
FADD	1.239203	0.000489981	0.005716449
CASP8	1.239444	1.97E-05	0.000398092
GNS	1.239573	1.25E-06	3.58E-05
ANKRA2	1.239825	0.000491116	0.005722902
STX8	1.239908	0.00774835	0.046377807
HBP1	1.239965	0.000771978	0.008145218
GOLGA8A	1.240475	0.001846017	0.016016909
S100PBP	1.240488	1.54E-05	0.00032437
ZNF92	1.240632	0.000127459	0.001901365
ZNF658	1.240712	0.000986256	0.009798163
WWOX	1.241732	0.006035654	0.038689744
HSD17B7	1.242328	0.002171306	0.018112189
NADK	1.24297	2.79E-06	7.26E-05
WDFY1	1.24311	1.75E-05	0.000361389
TSTD1	1.243343	0.003435144	0.025754672
SNN	1.243611	0.000639272	0.007075557
AGA	1.243997	0.002344919	0.019204421
VOPP1	1.24407	1.30E-05	0.000278861
ZNF211	1.244492	0.000424762	0.005138021
PKP3	1.244556	0.0003419	0.004323858
F11R	1.244737	5.12E-06	0.000123282
BOLA3	1.245606	0.00450088	0.031359205
UPF3B	1.245788	0.002994855	0.023174853
ZCCHC9	1.245914	3.99E-05	0.000723343
PPM1F	1.24603	2.66E-05	0.000514232
NUCB2	1.246069	0.000259549	0.003438841
CRELD2	1.246094	0.000816272	0.008464284
NAGPA	1.246388	0.002973195	0.02305662
SAMM50	1.246909	1.37E-05	0.000293107
ACBD6	1.247098	5.73E-05	0.000976008
TNFAIP3	1.247246	0.000568088	0.006430467
SPHK1	1.247438	0.00056356	0.006397675
DGCR6L	1.247554	0.001024235	0.010085361
FAM32A	1.247617	0.000492542	0.005727837
OXSM	1.247916	0.002015883	0.017060652
KLHL15	1.248	0.000532886	0.006098868
HECA	1.248159	7.55E-05	0.001238752
BCAT2	1.248262	0.001548425	0.013962873
CLDN4	1.248353	7.74E-05	0.001267428
STC2	1.248361	8.75E-06	0.000196509
CEBPB	1.248784	0.000583034	0.006568788
TRIM5	1.249165	1.28E-05	0.000275498
DNPH1	1.249506	0.000973752	0.009687257
KLF4	1.249608	3.78E-05	0.00068974
MT1X	1.24999	0.004072893	0.029261267
SLC18B1	1.250228	0.000628744	0.006969708
NIPSNAP3A	1.250959	0.00128443	0.012024894
FOXO4	1.251021	0.000265291	0.003508494
PLK2	1.251181	1.24E-05	0.000268686
ZNF32	1.251198	0.002004052	0.017020314
FJX1	1.251375	4.94E-05	0.000859525
GZMB	1.251817	0.005735041	0.037275187
SNHG6	1.251849	0.000241417	0.003243205
TRIM34	1.251959	7.75E-06	0.000177217
NPM3	1.252415	0.001254939	0.011848554
GTF2E2	1.253453	0.00045766	0.005431425
ZNF2	1.253692	0.001073434	0.010491206
ACP3	1.25388	0.002515802	0.020248283
NEK3	1.254656	0.000769915	0.008141276
NR1H2	1.254938	0.000213847	0.002921696
ZNF669	1.254953	0.007300591	0.044452421
CIB2	1.255057	0.002089662	0.017582112
BDH2	1.255634	0.004409013	0.03090849
MED11	1.255993	0.003296729	0.024884706
CPT2	1.256257	0.000162305	0.002332913
CRELD1	1.256763	0.007159333	0.043925364
EDEM2	1.257054	2.58E-05	0.000501515
TRAF4	1.257151	1.18E-05	0.000257354
RPA2	1.257496	1.94E-05	0.00039431
STXBP6	1.257677	0.000560147	0.006365509
LIPH	1.258326	0.000134413	0.001986644
PTPRJ	1.258362	1.21E-05	0.000262142
DNASE2	1.258456	0.000223268	0.003033209
MYLIP	1.258494	4.33E-06	0.000106875
AVL9	1.258754	5.10E-07	1.61E-05
RMC1	1.25895	0.001359692	0.012582813
DIS3	1.258955	5.19E-06	0.000124402
ZNF239	1.259146	0.001061673	0.010390309
ASB13	1.259268	4.16E-05	0.000749154
TMEM129	1.259377	9.43E-05	0.001494301
TEAD2	1.259636	0.001114134	0.010788412
CLTA	1.260073	0.000131021	0.001942475
PDCD7	1.260913	4.53E-05	0.000800982
KBTBD7	1.26094	4.98E-05	0.000865106
NGDN	1.261069	0.000859846	0.008814944
LAMA1	1.261414	0.002669852	0.021181513
ZNF593	1.261425	0.00128223	0.012014063
FAHD2A	1.261761	0.00029777	0.003856873
OPHN1	1.261954	0.001179886	0.011339926
CFDP1	1.262211	1.14E-05	0.000249489
NFKBIE	1.262424	0.003353691	0.025222475
SPRR3	1.262563	0.000371021	0.004607482
NBN	1.262615	8.79E-06	0.000196904
GALT	1.262875	2.11E-05	0.000423431
KLHDC3	1.263481	0.000188594	0.002641596
EXOC2	1.26356	2.55E-06	6.74E-05
RAP2B	1.263617	2.92E-06	7.56E-05
PGPEP1	1.263619	0.003503807	0.026133915
SMARCD2	1.264142	4.73E-06	0.000115095
TMEM250	1.2645	0.000200766	0.002779756
MAP3K10	1.264633	0.008357919	0.04877421
TMEM132A	1.264961	2.98E-05	0.000565819
ABRACL	1.265062	0.000105175	0.001629474
PIM2	1.265247	0.003700504	0.027111397
TSPAN4	1.265321	0.004082495	0.029315677
XBP1	1.265354	2.77E-06	7.24E-05
ZNF433	1.265698	0.000205609	0.002834183
TBC1D8	1.265861	1.39E-05	0.000296468
SSBP4	1.266024	0.005908758	0.038088015
ZNF267	1.266597	5.04E-05	0.000872828
PNPLA8	1.266622	0.000108921	0.001673177
PPP1R37	1.267244	0.000119499	0.001801203
SLC1A4	1.267281	0.000404383	0.00493279
RBCK1	1.267359	6.87E-06	0.000159817
STAT5B	1.267428	8.52E-06	0.000191837
GPX1P1	1.267596	0.007373662	0.044746553
LOXL4	1.26799	0.005054102	0.034138803
TYSND1	1.268721	0.000197913	0.002745515
C4orf46	1.268981	6.98E-05	0.001157428
APOBEC3G	1.269343	2.41E-05	0.000474106
ADRA2C	1.271307	0.000919602	0.009269765
CFL1	1.271344	2.50E-06	6.63E-05
C1orf216	1.271859	2.14E-05	0.000428285
AKR1C3	1.271947	0.002949166	0.022907143
TMEM87A	1.272207	4.39E-06	0.000107686
H3-3B	1.272349	8.01E-06	0.000182087
ERP29	1.272696	6.84E-06	0.000159373
INIP	1.272807	3.48E-05	0.000648711
HMGCS1	1.273016	3.95E-08	1.66E-06
P4HA1	1.273279	2.22E-06	5.93E-05
WHAMMP1	1.27352	0.003480084	0.025992479
H1-10	1.273804	9.39E-05	0.001491586
BORCS6	1.2743	0.007236294	0.0442099
TAF6L	1.27457	0.001208274	0.011520843
PLD1	1.274879	6.29E-05	0.001057187
POGLUT3	1.275011	2.92E-07	9.70E-06
SLC66A1	1.275239	0.000136468	0.002009214
PACC1	1.275454	0.000115829	0.001758734
ZNF227	1.275538	3.19E-05	0.000601367
OPTN	1.275587	2.02E-06	5.46E-05
C4orf3	1.275728	7.98E-07	2.39E-05
BNIP2	1.276459	5.50E-06	0.000131015
TINCR	1.276694	7.13E-06	0.000164562
FIG4	1.276819	1.63E-05	0.000340849
USF1	1.27691	9.33E-06	0.0002078
TUBB2A	1.277023	3.84E-05	0.000696889
CHIC2	1.277043	0.001771298	0.015508246
PPP1R3D	1.277217	2.79E-06	7.26E-05
MYDGF	1.277275	0.000658331	0.007225643
MYCN	1.27749	0.002691602	0.021307288
MMP9	1.277655	0.001225977	0.011643564
GPT2	1.277698	1.20E-05	0.000260545
ETFDH	1.277974	9.99E-05	0.001566873
ZFAS1	1.278098	6.90E-05	0.001148477
RELB	1.278132	0.00046745	0.005515906
NRBP1	1.278517	8.33E-08	3.17E-06
MTLN	1.278584	0.002640117	0.021003242
GJB5	1.278644	0.001495593	0.013562606
AIP	1.279487	4.91E-05	0.00085554
SLC27A3	1.279614	0.006560355	0.041140967
GRINA	1.279742	0.000939129	0.009414086
MIR22HG	1.279823	0.000640715	0.007084955
PLEKHF1	1.279988	2.11E-05	0.000423431
CYB5D2	1.280076	0.005193876	0.034695929
RFK	1.280636	1.78E-05	0.000366146
MCRIP1	1.281058	0.00072591	0.007784152
ZNF492	1.282484	0.000157883	0.002282196
LY6E	1.282687	3.27E-05	0.000614885
LRRC57	1.282835	1.89E-06	5.16E-05
AP2M1	1.282902	1.04E-05	0.000229732
[truncated: 505 more rows]
