# Supplementary material for: Downregulation of LOC441461 Promotes Cell Growth and Motility in Human Gastric Cancer
Source: Cancers (Basel). 2022 Feb 23;14(5):1149. doi: 10.3390/cancers14051149 (PMC8909665; doi:10.3390/cancers14051149)
Supplement: Supplementary file 1 [file cancers-14-01149-s001.zip › Table S7.xlsx]

## Sheet: Sheet1
Table S6. Results of pathway enrichment analysis using the Reactome database and differentially expressed genes. Blue indicates a downregulated pathway in the LOC441461 knockdown group. Red indicates a upregulated pathway in the LOC441461 knockdown group.
Regulated way	Enrichment FDR	Genes in list	Total genes	Functional Category
	0.00740346	61	671	Membrane Trafficking
	0.00740346	10	37	RUNX1 interacts with co-factors whose precise effect on RUNX1 targets is not known
	0.0176828	112	1516	Post-translational protein modification
	0.039339	46	513	Signaling by Rho GTPases
	0.039339	16	110	Mitotic Spindle Checkpoint
	0.0483526	63	782	Vesicle-mediated transport
	1.71e-19	60	243	Interferon Signaling
	9.06e-15	34	103	Interferon alpha/beta signaling
	1.38e-14	124	983	Cytokine Signaling in Immune system
	4.3e-12	32	112	Interferon gamma signaling
	9.01e-12	238	2610	Immune System
	5.29e-06	20	82	Antiviral mechanism by IFN-stimulated genes
	0.000136197	182	2262	Metabolism
	0.000283352	55	495	Neutrophil degranulation
	0.000340092	28	186	Apoptosis
	0.000340092	6	9	OAS antiviral response
	0.000513549	61	587	Cellular responses to external stimuli
	0.000561236	28	193	Programmed Cell Death
	0.0015941	15	74	ISG15 antiviral mechanism
	0.00224676	119	1441	Generic Transcription Pathway
	0.00245196	16	87	DDX58/IFIH1-mediated induction of interferon-alpha/beta
	0.00245196	67	706	Signaling by Interleukins
	0.00286285	8	24	Cytosolic tRNA aminoacylation
	0.00298883	179	2371	Metabolism of proteins
	0.00298883	109	1313	Innate Immune System
	0.00423017	10	40	Negative regulators of DDX58/IFIH1 signaling
	0.00452171	6	14	TRAF3-dependent IRF activation pathway
	0.00573182	8	27	Interleukin-20 family signaling
	0.00777771	120	1516	Post-translational protein modification
	0.00792165	12	61	SCFSkp2-mediated degradation of p27/p21
	0.00792165	13	70	G1/S DNA Damage Checkpoints
	0.00886442	46	462	Class I MHC mediated antigen processing & presentation
	0.00944002	16	102	Unfolded Protein Response UPR
	0.00944002	34	309	Antigen processingUbiquitination & Proteasome degradation
	0.00944002	39	375	Transcriptional Regulation by TP53
	0.00944002	11	54	Regulation of Apoptosis
	0.00944002	7	23	Endosomal/Vacuolar pathway
	0.0103996	127	1646	RNA Polymerase II Transcription
	0.0106923	14	84	Cyclin E associated events during G1/S transition
	0.0106923	16	104	Interleukin-1 signaling
	0.0130391	5	12	NF-kB activation through FADD/RIP-1 pathway mediated by caspase-8 and -10
	0.0130391	14	86	Cyclin A:Cdk2-associated events at S phase entry
	0.0138764	17	118	ER-Phagosome pathway
	0.0147105	12	68	P53-Dependent G1 DNA Damage Response
	0.0147105	12	68	P53-Dependent G1/S DNA damage checkpoint
	0.0159992	7	26	ATF4 activates genes in response to endoplasmic reticulum stress
	0.0159992	39	391	Diseases of signal transduction
	0.0159992	9	42	TRNA Aminoacylation
	0.0159992	7	26	Insulin receptor recycling
	0.0177192	67	783	Metabolism of lipids
	0.0185308	4	8	TRAIL signaling
	0.0185308	4	8	Synthesis of UDP-N-acetyl-glucosamine
	0.0198736	10	53	Ubiquitin Mediated Degradation of Phosphorylated Cdc25A
	0.0198736	10	53	P53-Independent DNA Damage Response
	0.0198736	10	53	P53-Independent G1/S DNA damage checkpoint
	0.0198736	3	4	Activation myristolyation of BID and translocation to mitochondria
	0.0209477	8	36	PERK regulates gene expression
	0.0209477	137	1851	Gene expression Transcription
	0.0234736	11	64	Iron uptake and transport
	0.0248527	26	236	Neddylation
	0.0248527	10	55	Vif-mediated degradation of APOBEC3G
	0.0264039	16	118	Autophagy
	0.0266854	18	141	Interleukin-1 family signaling
	0.0323055	17	132	PPARA activates gene expression
	0.0340594	44	483	Cellular responses to stress
	0.0347488	31	308	Deubiquitination
	0.0347488	7	31	Transferrin endocytosis and recycling
	0.0356843	17	134	Regulation of lipid metabolism by Peroxisome proliferator-activated receptor alpha PPARalpha
	0.0360787	12	79	The role of GTSE1 in G2/M progression after G2 checkpoint
	0.0388571	30	298	Other interleukin signaling
	0.0388571	10	60	NIK-->noncanonical NF-kB signaling
	0.0388571	18	148	G1/S Transition
	0.0388571	10	60	Metabolism of polyamines
	0.0388571	10	60	AUF1 hnRNP D0 binds and destabilizes mRNA
	0.0388571	10	60	Hh mutants abrogate ligand secretion
	0.0423854	9	51	Regulation of activated PAK-2p34 by proteasome mediated degradation
	0.0443137	12	82	FOXO-mediated transcription
	0.0453793	6	25	FOXO-mediated transcription of cell cycle genes
	0.0454738	10	62	Defective CFTR causes cystic fibrosis
	0.0454738	4	11	Regulation by c-FLIP
	0.0454738	4	11	CASP8 activity is inhibited
	0.0454738	4	11	Dimerization of procaspase-8
	0.0454738	9	52	Regulation of ornithine decarboxylase ODC
	0.0476174	14	106	PCP/CE pathway
	0.0476174	26	254	MAPK1/MAPK3 signaling
	0.0476174	9	53	Vpu mediated degradation of CD4
	0.0476174	9	53	Autodegradation of the E3 ubiquitin ligase COP1
	0.0476174	13	95	Macroautophagy
