# Supplementary material for: Downregulation of LOC441461 Promotes Cell Growth and Motility in Human Gastric Cancer
Source: Cancers (Basel). 2022 Feb 23;14(5):1149. doi: 10.3390/cancers14051149 (PMC8909665; doi:10.3390/cancers14051149)
Supplement: Supplementary file 1 [file cancers-14-01149-s001.zip › Table S8.csv]

Table S7. Molecules that interact with LOC441461.
Actor1	Category	Species	Actor2	Category	Species	score
STX17-AS1	lncRNA	Homo sapiens	POLR2A	protein	Homo sapiens	0.7388
STX17-AS1	lncRNA	Homo sapiens	FOXA1	TF	Homo sapiens	0.5695
STX17-AS1	lncRNA	Homo sapiens	CTCF	TF	Homo sapiens	0.5554
STX17-AS1	lncRNA	Homo sapiens	SOX2	TF	Homo sapiens	0.5093
STX17-AS1	lncRNA	Homo sapiens	GATA6	TF	Homo sapiens	0.4892
STX17-AS1	lncRNA	Homo sapiens	ESR1	TF	Homo sapiens	0.4823
STX17-AS1	lncRNA	Homo sapiens	MYC	TF	Homo sapiens	0.4807
STX17-AS1	lncRNA	Homo sapiens	SMARCA4	TF	Homo sapiens	0.4578
STX17-AS1	lncRNA	Homo sapiens	TAL1	TF	Homo sapiens	0.4547
STX17-AS1	lncRNA	Homo sapiens	PHF8	TF	Homo sapiens	0.4204
STX17-AS1	lncRNA	Homo sapiens	AR	TF	Homo sapiens	0.42
STX17-AS1	lncRNA	Homo sapiens	HSF1	TF	Homo sapiens	0.4163
STX17-AS1	lncRNA	Homo sapiens	RELA	TF	Homo sapiens	0.4138
STX17-AS1	lncRNA	Homo sapiens	KDM5B	TF	Homo sapiens	0.4109
STX17-AS1	lncRNA	Homo sapiens	NANOG	TF	Homo sapiens	0.4107
STX17-AS1	lncRNA	Homo sapiens	CHD8	TF	Homo sapiens	0.393
STX17-AS1	lncRNA	Homo sapiens	POU5F1	TF	Homo sapiens	0.3818
STX17-AS1	lncRNA	Homo sapiens	STAG1	TF	Homo sapiens	0.358
STX17-AS1	lncRNA	Homo sapiens	CREBBP	TF	Homo sapiens	0.3528
STX17-AS1	lncRNA	Homo sapiens	ERG	TF	Homo sapiens	0.352
STX17-AS1	lncRNA	Homo sapiens	GATA4	TF	Homo sapiens	0.3494
STX17-AS1	lncRNA	Homo sapiens	KLF5	TF	Homo sapiens	0.3475
STX17-AS1	lncRNA	Homo sapiens	E2F7	TF	Homo sapiens	0.3436
STX17-AS1	lncRNA	Homo sapiens	EP300	TF	Homo sapiens	0.3427
STX17-AS1	lncRNA	Homo sapiens	TCF4	TF	Homo sapiens	0.3376
STX17-AS1	lncRNA	Homo sapiens	UBTF	TF	Homo sapiens	0.3375
STX17-AS1	lncRNA	Homo sapiens	SMARCB1	TF	Homo sapiens	0.3328
STX17-AS1	lncRNA	Homo sapiens	YY1	TF	Homo sapiens	0.3324
STX17-AS1	lncRNA	Homo sapiens	RING1	TF	Homo sapiens	0.3317
STX17-AS1	lncRNA	Homo sapiens	TP63	TF	Homo sapiens	0.3304
STX17-AS1	lncRNA	Homo sapiens	EGR1	TF	Homo sapiens	0.3261
STX17-AS1	lncRNA	Homo sapiens	RUNX1	TF	Homo sapiens	0.3232
STX17-AS1	lncRNA	Homo sapiens	TP53	TF	Homo sapiens	0.3219
STX17-AS1	lncRNA	Homo sapiens	JUND	TF	Homo sapiens	0.3172
STX17-AS1	lncRNA	Homo sapiens	FOXM1	TF	Homo sapiens	0.3092
STX17-AS1	lncRNA	Homo sapiens	MBD3	TF	Homo sapiens	0.3084
STX17-AS1	lncRNA	Homo sapiens	MITF	TF	Homo sapiens	0.3063
STX17-AS1	lncRNA	Homo sapiens	MYOD1	TF	Homo sapiens	0.3059
STX17-AS1	lncRNA	Homo sapiens	STAT1	TF	Homo sapiens	0.2568
STX17-AS1	lncRNA	Homo sapiens	CRNDE	lncRNA	Homo sapiens	0.2568
STX17-AS1	lncRNA	Homo sapiens	lincMTX2	lncRNA	Homo sapiens	0.2568
STX17-AS1	lncRNA	Homo sapiens	KAT2B	TF	Homo sapiens	0.2566
STX17-AS1	lncRNA	Homo sapiens	KAT8	TF	Homo sapiens	0.2566
STX17-AS1	lncRNA	Homo sapiens	KAT5	TF	Homo sapiens	0.2566
STX17-AS1	lncRNA	Homo sapiens	HDAC1	TF	Homo sapiens	0.2566
STX17-AS1	lncRNA	Homo sapiens	BRD4	TF	Homo sapiens	0.2511
STX17-AS1	lncRNA	Homo sapiens	SMAD1	TF	Homo sapiens	0.25
STX17-AS1	lncRNA	Homo sapiens	TRIM28	TF	Homo sapiens	0.25
STX17-AS1	lncRNA	Homo sapiens	SMAD4	TF	Homo sapiens	0.25
STX17-AS1	lncRNA	Homo sapiens	FOXA2	TF	Homo sapiens	0.25
STX17-AS1	lncRNA	Homo sapiens	LEF1	TF	Homo sapiens	0.25
STX17-AS1	lncRNA	Homo sapiens	SNAI2	TF	Homo sapiens	0.25
STX17-AS1	lncRNA	Homo sapiens	OTX2	TF	Homo sapiens	0.25
STX17-AS1	lncRNA	Homo sapiens	SOX17	TF	Homo sapiens	0.25
STX17-AS1	lncRNA	Homo sapiens	TAF3	TF	Homo sapiens	0.2499
STX17-AS1	lncRNA	Homo sapiens	TLE3	TF	Homo sapiens	0.2472
STX17-AS1	lncRNA	Homo sapiens	NR2F2	TF	Homo sapiens	0.2472
STX17-AS1	lncRNA	Homo sapiens	MECOM	TF	Homo sapiens	0.2469
STX17-AS1	lncRNA	Homo sapiens	GLIS1	TF	Homo sapiens	0.2469
STX17-AS1	lncRNA	Homo sapiens	LMX1B	TF	Homo sapiens	0.2469
STX17-AS1	lncRNA	Homo sapiens	NKX2-2	TF	Homo sapiens	0.2469
STX17-AS1	lncRNA	Homo sapiens	SREBF1	TF	Homo sapiens	0.2469
STX17-AS1	lncRNA	Homo sapiens	FOXF1	TF	Homo sapiens	0.2469
STX17-AS1	lncRNA	Homo sapiens	ZNF280D	TF	Homo sapiens	0.2469
STX17-AS1	lncRNA	Homo sapiens	ASCL2	TF	Homo sapiens	0.2469
STX17-AS1	lncRNA	Homo sapiens	ERF	TF	Homo sapiens	0.2469
STX17-AS1	lncRNA	Homo sapiens	GMEB1	TF	Homo sapiens	0.2469
STX17-AS1	lncRNA	Homo sapiens	HOXA1	TF	Homo sapiens	0.2469
STX17-AS1	lncRNA	Homo sapiens	NFE2L2	TF	Homo sapiens	0.2469
STX17-AS1	lncRNA	Homo sapiens	SMC1A	TF	Homo sapiens	0.2469
STX17-AS1	lncRNA	Homo sapiens	ZNF250	TF	Homo sapiens	0.2469
STX17-AS1	lncRNA	Homo sapiens	DLX1	TF	Homo sapiens	0.2469
STX17-AS1	lncRNA	Homo sapiens	IRF1	TF	Homo sapiens	0.2469
STX17-AS1	lncRNA	Homo sapiens	FEV	TF	Homo sapiens	0.2469
STX17-AS1	lncRNA	Homo sapiens	HOXA13	TF	Homo sapiens	0.2469
STX17-AS1	lncRNA	Homo sapiens	LYL1	TF	Homo sapiens	0.2469
STX17-AS1	lncRNA	Homo sapiens	PATZ1	TF	Homo sapiens	0.2469
STX17-AS1	lncRNA	Homo sapiens	TBXT	TF	Homo sapiens	0.2469
STX17-AS1	lncRNA	Homo sapiens	E2F3	TF	Homo sapiens	0.2469
STX17-AS1	lncRNA	Homo sapiens	ZNF395	TF	Homo sapiens	0.2469
STX17-AS1	lncRNA	Homo sapiens	ATOH1	TF	Homo sapiens	0.2469
STX17-AS1	lncRNA	Homo sapiens	ESRRA	TF	Homo sapiens	0.2469
STX17-AS1	lncRNA	Homo sapiens	GMEB2	TF	Homo sapiens	0.2469
STX17-AS1	lncRNA	Homo sapiens	MED12	TF	Homo sapiens	0.2469
STX17-AS1	lncRNA	Homo sapiens	NIPBL	TF	Homo sapiens	0.2469
STX17-AS1	lncRNA	Homo sapiens	SOX9	TF	Homo sapiens	0.2469
STX17-AS1	lncRNA	Homo sapiens	ATF5	TF	Homo sapiens	0.2469
STX17-AS1	lncRNA	Homo sapiens	REST	TF	Homo sapiens	0.2469
STX17-AS1	lncRNA	Homo sapiens	ETV5	TF	Homo sapiens	0.2469
STX17-AS1	lncRNA	Homo sapiens	FOXD2	TF	Homo sapiens	0.2469
STX17-AS1	lncRNA	Homo sapiens	HOXC6	TF	Homo sapiens	0.2469
STX17-AS1	lncRNA	Homo sapiens	MNT	TF	Homo sapiens	0.2469
STX17-AS1	lncRNA	Homo sapiens	RARG	TF	Homo sapiens	0.2469
STX17-AS1	lncRNA	Homo sapiens	TP73	TF	Homo sapiens	0.2469
STX17-AS1	lncRNA	Homo sapiens	HOXA6	TF	Homo sapiens	0.2469
STX17-AS1	lncRNA	Homo sapiens	ZNF83	TF	Homo sapiens	0.2469
STX17-AS1	lncRNA	Homo sapiens	E2F2	TF	Homo sapiens	0.2469
STX17-AS1	lncRNA	Homo sapiens	ETV4	TF	Homo sapiens	0.2469
STX17-AS1	lncRNA	Homo sapiens	HBP1	TF	Homo sapiens	0.2469
STX17-AS1	lncRNA	Homo sapiens	MED1	TF	Homo sapiens	0.2469
STX17-AS1	lncRNA	Homo sapiens	RFX1	TF	Homo sapiens	0.2469
STX17-AS1	lncRNA	Homo sapiens	TFDP1	TF	Homo sapiens	0.2469
STX17-AS1	lncRNA	Homo sapiens	BARHL1	TF	Homo sapiens	0.2469
STX17-AS1	lncRNA	Homo sapiens	RAD21	TF	Homo sapiens	0.2469
STX17-AS1	lncRNA	Homo sapiens	TCF3	TF	Homo sapiens	0.2469
STX17-AS1	lncRNA	Homo sapiens	ETS2	TF	Homo sapiens	0.2469
STX17-AS1	lncRNA	Homo sapiens	GLI3	TF	Homo sapiens	0.2469
STX17-AS1	lncRNA	Homo sapiens	HSF4	TF	Homo sapiens	0.2469
STX17-AS1	lncRNA	Homo sapiens	MXD1	TF	Homo sapiens	0.2469
STX17-AS1	lncRNA	Homo sapiens	SATB1	TF	Homo sapiens	0.2469
STX17-AS1	lncRNA	Homo sapiens	VEZF1	TF	Homo sapiens	0.2469
STX17-AS1	lncRNA	Homo sapiens	ELF2	TF	Homo sapiens	0.2469
STX17-AS1	lncRNA	Homo sapiens	CUX1	TF	Homo sapiens	0.2469
STX17-AS1	lncRNA	Homo sapiens	EHF	TF	Homo sapiens	0.2469
STX17-AS1	lncRNA	Homo sapiens	GLI2	TF	Homo sapiens	0.2469
STX17-AS1	lncRNA	Homo sapiens	HINFP	TF	Homo sapiens	0.2469
STX17-AS1	lncRNA	Homo sapiens	NFAT5	TF	Homo sapiens	0.2469
STX17-AS1	lncRNA	Homo sapiens	RXRA	TF	Homo sapiens	0.2469
STX17-AS1	lncRNA	Homo sapiens	ZBTB7B	TF	Homo sapiens	0.2469
STX17-AS1	lncRNA	Homo sapiens	CREB3L4	TF	Homo sapiens	0.2469
STX17-AS1	lncRNA	Homo sapiens	SMC3	TF	Homo sapiens	0.2469
STX17-AS1	lncRNA	Homo sapiens	CDK8	TF	Homo sapiens	0.245
STX17-AS1	lncRNA	Homo sapiens	E2F1	TF	Homo sapiens	0.2446
STX17-AS1	lncRNA	Homo sapiens	AR	mRNA	Homo sapiens	0.2423
STX17-AS1	lncRNA	Homo sapiens	ETV1	TF	Homo sapiens	0.2421
STX17-AS1	lncRNA	Homo sapiens	TEAD4	TF	Homo sapiens	0.2396
STX17-AS1	lncRNA	Homo sapiens	SMAD2	TF	Homo sapiens	0.2396
STX17-AS1	lncRNA	Homo sapiens	SMARCC1	TF	Homo sapiens	0.2371
STX17-AS1	lncRNA	Homo sapiens	BRD3	TF	Homo sapiens	0.2356
STX17-AS1	lncRNA	Homo sapiens	IRF2	TF	Homo sapiens	0.2331
STX17-AS1	lncRNA	Homo sapiens	MRE11	TF	Homo sapiens	0.2323
STX17-AS1	lncRNA	Homo sapiens	AFF4	TF	Homo sapiens	0.2309
STX17-AS1	lncRNA	Homo sapiens	GATA3	TF	Homo sapiens	0.2308
STX17-AS1	lncRNA	Homo sapiens	CDX2	TF	Homo sapiens	0.2306
STX17-AS1	lncRNA	Homo sapiens	HNF4A	TF	Homo sapiens	0.2306
STX17-AS1	lncRNA	Homo sapiens	ETS1	TF	Homo sapiens	0.2304
STX17-AS1	lncRNA	Homo sapiens	EZH1	TF	Homo sapiens	0.2302
STX17-AS1	lncRNA	Homo sapiens	TFAP2C	TF	Homo sapiens	0.2298
STX17-AS1	lncRNA	Homo sapiens	BCOR	TF	Homo sapiens	0.229
STX17-AS1	lncRNA	Homo sapiens	SPDEF	TF	Homo sapiens	0.229
STX17-AS1	lncRNA	Homo sapiens	HDAC2	TF	Homo sapiens	0.229
STX17-AS1	lncRNA	Homo sapiens	BCL6	TF	Homo sapiens	0.229
STX17-AS1	lncRNA	Homo sapiens	CDK6	TF	Homo sapiens	0.2277
STX17-AS1	lncRNA	Homo sapiens	BRD1	TF	Homo sapiens	0.2267
STX17-AS1	lncRNA	Homo sapiens	FOXH1	TF	Homo sapiens	0.2265
STX17-AS1	lncRNA	Homo sapiens	E2F4	TF	Homo sapiens	0.2261
STX17-AS1	lncRNA	Homo sapiens	KLF4	TF	Homo sapiens	0.2261
STX17-AS1	lncRNA	Homo sapiens	EGR2	TF	Homo sapiens	0.2259
STX17-AS1	lncRNA	Homo sapiens	AGO1	TF	Homo sapiens	0.2255
STX17-AS1	lncRNA	Homo sapiens	CSNK2A1	TF	Homo sapiens	0.2249
STX17-AS1	lncRNA	Homo sapiens	HIRA	TF	Homo sapiens	0.2247
STX17-AS1	lncRNA	Homo sapiens	RB1	TF	Homo sapiens	0.2231
STX17-AS1	lncRNA	Homo sapiens	KMT2A	TF	Homo sapiens	0.2219
STX17-AS1	lncRNA	Homo sapiens	CBX5	TF	Homo sapiens	0.2219
STX17-AS1	lncRNA	Homo sapiens	TCF7L2	TF	Homo sapiens	0.2205
STX17-AS1	lncRNA	Homo sapiens	CEBPA	TF	Homo sapiens	0.2187
STX17-AS1	lncRNA	Homo sapiens	GATA1	TF	Homo sapiens	0.2182
STX17-AS1	lncRNA	Homo sapiens	HES1	TF	Homo sapiens	0.2176
STX17-AS1	lncRNA	Homo sapiens	GABPA	TF	Homo sapiens	0.2164
STX17-AS1	lncRNA	Homo sapiens	ZNF552	TF	Homo sapiens	0.2153
STX17-AS1	lncRNA	Homo sapiens	ERCC6	protein	Homo sapiens	0.2145
STX17-AS1	lncRNA	Homo sapiens	EBNA-LP	protein	Homo sapiens	0.2137
STX17-AS1	lncRNA	Homo sapiens	KLF9	TF	Homo sapiens	0.2128
STX17-AS1	lncRNA	Homo sapiens	HIF1A	TF	Homo sapiens	0.212
STX17-AS1	lncRNA	Homo sapiens	NRF1	TF	Homo sapiens	0.212
STX17-AS1	lncRNA	Homo sapiens	NKX2-1	TF	Homo sapiens	0.2117
STX17-AS1	lncRNA	Homo sapiens	KLF1	TF	Homo sapiens	0.2112
STX17-AS1	lncRNA	Homo sapiens	NFE2	TF	Homo sapiens	0.2112
STX17-AS1	lncRNA	Homo sapiens	CTBP2	TF	Homo sapiens	0.2096
STX17-AS1	lncRNA	Homo sapiens	FOXP1	TF	Homo sapiens	0.2096
STX17-AS1	lncRNA	Homo sapiens	GPS2	TF	Homo sapiens	0.2093
STX17-AS1	lncRNA	Homo sapiens	TBL1X	protein	Homo sapiens	0.2093
STX17-AS1	lncRNA	Homo sapiens	NCOR1	TF	Homo sapiens	0.2093
STX17-AS1	lncRNA	Homo sapiens	PSIP1	TF	Homo sapiens	0.2084
STX17-AS1	lncRNA	Homo sapiens	STAT4	TF	Homo sapiens	0.2052
STX17-AS1	lncRNA	Homo sapiens	NR5A1	TF	Homo sapiens	0.2052
STX17-AS1	lncRNA	Homo sapiens	IRF5	TF	Homo sapiens	0.2052
STX17-AS1	lncRNA	Homo sapiens	STAT3	TF	Homo sapiens	0.2041
STX17-AS1	lncRNA	Homo sapiens	DEK	TF	Homo sapiens	0.2033
STX17-AS1	lncRNA	Homo sapiens	ZFX	TF	Homo sapiens	0.2028
STX17-AS1	lncRNA	Homo sapiens	KDM1B	protein	Homo sapiens	0.2016
STX17-AS1	lncRNA	Homo sapiens	HOXC9	TF	Homo sapiens	0.2003
STX17-AS1	lncRNA	Homo sapiens	PRKDC	TF	Homo sapiens	0.2003
STX17-AS1	lncRNA	Homo sapiens	AEBP2	TF	Homo sapiens	0.1841
