# Supplementary material for: Downregulation of LOC441461 Promotes Cell Growth and Motility in Human Gastric Cancer
Source: Cancers (Basel). 2022 Feb 23;14(5):1149. doi: 10.3390/cancers14051149 (PMC8909665; doi:10.3390/cancers14051149)
Supplement: Supplementary file 1 [file cancers-14-01149-s001.zip › Table S9.xlsx]

## Sheet: Upregulation gene enriched TF
Enrichment FDR	Included Genes	Transcription Factor Target Genes	Transcription Factor
2.85e-14	50	239	IRF1
5.77e-14	218	2308	ELF1
5.95e-13	143	1337	USF1
1.02e-12	110	931	USF2
1.98e-12	287	3431	NFYB
4.25e-12	186	1972	MAX
5.85e-11	251	2990	BRCA1
7e-11	253	3029	E2F6
1.11e-10	29	119	IRF8
2.96e-09	159	1749	NRF1
1.47e-08	63	505	PPARG
4.07e-08	86	807	TCF3
5.78e-08	76	686	RCOR1
8.2e-08	175	2080	NFYA
8.2e-08	211	2623	ATF2
5.25e-07	44	332	BHLHE40
5.35e-07	70	650	STAT3
6.06e-07	84	837	ZMIZ1
1.32e-06	122	1386	CREB1
1.32e-06	96	1019	SIX5
4.09e-06	96	1046	SIN3A
6.82e-06	231	3114	TAF1
6.93e-06	164	2070	ZBTB7A
6.93e-06	67	663	CEBPD
7.91e-06	122	1445	PML
7.91e-06	87	941	KLF4
9.36e-06	122	1451	SPI1
9.67e-06	128	1542	UBTF
1.07e-05	139	1711	CTCF
1.42e-05	102	1173	PBX3
1.52e-05	88	975	NFE2L2
3.01e-05	32	250	NFIC
4.95e-05	27	199	NELFE
9.67e-05	20	130	CEBPB
0.000125255	68	747	GATA2
0.000214592	68	761	BCLAF1
0.000238826	93	1129	SMC3
0.000250946	54	570	NANOG
0.00026821	147	1964	GABPA
0.00026821	44	437	RELA
0.000316517	63	703	ZNF384
0.000359859	13	72	VDR
0.000413526	57	626	CHD1
0.000422827	94	1168	RAD21
0.000645456	98	1244	RUNX1
0.000838612	94	1194	HNF4A
0.000979031	50	551	TCF7L2
0.00103966	15	102	ATF3
0.00178508	34	345	SALL4
0.00178508	31	305	EGR1
0.00207682	21	180	FOSL2
0.0022396	31	310	TP53
0.00284591	46	524	RFX5
0.0042385	18	154	ETS1
0.00445805	105	1440	MYC
0.00681295	47	565	FOS
0.00681295	58	729	SOX2
0.00866759	95	1315	TP63
0.0104809	18	169	HDAC2
0.0141341	62	820	E2F1
0.0224521	49	638	ZBTB33
0.0298314	11	97	ZEB1
0.039128	25	296	FOXA2
0.0406063	9	77	CBX3
0.0406063	18	197	FOXA1
0.0437108	46	621	FLI1

## Sheet: Downregulation gene enriched TF
Table S8. Significantly enriched transcription factors.
Enrichment FDR	Included Genes	Transcription Factor Target Genes	Transcription Factor
3.4e-38	202	1542	UBTF
1.53e-20	287	3431	NFYB
5.7e-18	193	2070	ZBTB7A
1.29e-14	242	3029	E2F6
4.67e-14	86	703	ZNF384
3.02e-13	92	807	TCF3
4.99e-13	208	2574	YY1
5.92e-13	177	2080	NFYA
7.08e-13	89	784	GATA1
7.36e-13	108	1047	AR
1.23e-12	84	729	SOX2
1.23e-12	238	3114	TAF1
2.44e-12	52	345	SALL4
2.44e-12	115	1173	PBX3
5.28e-12	70	569	SMAD4
1.33e-11	34	172	STAT3
3.69e-11	75	660	E2F4
5.42e-11	81	747	GATA2
9.15e-10	121	1386	CREB1
3.32e-09	92	975	NFE2L2
3.32e-09	62	551	TCF7L2
4.16e-09	139	1711	CTCF
1.01e-08	62	570	NANOG
1.01e-08	108	1244	RUNX1
1.74e-08	61	565	FOS
2.71e-08	99	1129	SMC3
1.71e-07	60	588	IRF3
2.44e-07	25	151	ESR1
2.44e-07	34	252	POU5F1
3.09e-07	66	686	RCOR1
4.17e-07	64	663	CEBPD
5.62e-07	33	250	NFIC
5.98e-07	81	926	SP2
7.34e-07	203	2990	BRCA1
1.93e-06	17	86	FOXM1
2.32e-06	72	820	E2F1
2.33e-06	52	524	RFX5
2.37e-06	73	837	ZMIZ1
3.06e-06	60	647	SP1
4e-06	102	1315	TP63
6.08e-06	140	1972	MAX
6.25e-06	78	941	KLF4
9.76e-06	48	495	EGR1
1.81e-05	56	626	CHD1
2.96e-05	18	117	ZKSCAN1
4.35e-05	32	296	FOXA2
5.95e-05	171	2623	ATF2
9.06e-05	97	1337	USF1
0.000142253	21	169	FOXP2
0.000142253	21	169	HDAC2
0.000308794	75	1010	SPI1
0.000341448	32	332	BHLHE40
0.0010423	16	130	CEBPB
0.00111316	21	197	FOXA1
0.00146615	67	931	USF2
0.00320045	123	1964	GABPA
0.00341386	111	1749	NRF1
0.00447487	20	207	TRIM28
0.00460425	93	1440	MYC
0.00471438	18	180	FOSL2
0.00471438	39	505	PPARG
0.00506252	42	557	TAF7
0.00520654	16	154	ETS1
0.00568951	18	184	STAT5A
0.0082787	76	1168	RAD21
0.0095951	77	1194	HNF4A
0.0120502	22	261	PPARD
0.0120502	68	1046	SIN3A
0.0158794	23	284	SRF
0.0158794	89	1445	PML
0.0309469	8	72	VDR
0.0323993	132	2308	ELF1
0.0380344	23	310	TP53
0.0425021	8	77	CBX3
0.047596	19	251	BCL3
