# Supplementary material for: Downregulation of LOC441461 Promotes Cell Growth and Motility in Human Gastric Cancer
Source: Cancers (Basel). 2022 Feb 23;14(5):1149. doi: 10.3390/cancers14051149 (PMC8909665; doi:10.3390/cancers14051149)
Supplement: Supplementary file 1 [file cancers-14-01149-s001.zip › Table S10.xlsx]

## Sheet: RELA Target Gene
Gene
ABCB4
ABHD2
ABI1
ABTB2
ACHE
ACSS1
ADCK3
ADCK4
ADRA2B
ADRBK2
AGO2
AGTRAP
AHCTF1
AHNAK
AICDA
AKAP13
ALCAM
ALOX5
AMACR
ANXA7
AP1S3
AP2A1
AP2B1
AP4M1
APBB2
APLF
APOBEC3B
ARF1
ARFRP1
ARHGEF2
ARID1A
ARID2
ARL14EP
ARL4A
ARL5B
ARL6IP5
ASAP1
ASB6
ASPH
ATG13
ATG16L2
ATOX1
ATR
ATXN2L
AZIN1
B2M
B3GAT3
B4GALT5
BAX
BBC3
BCAT1
BCL2
BCL2A1
BCL2L1
BCL2L11
BCL3
BCL9L
BHLHE40
BIN3
BIRC2
BIRC3
BLNK
BLOC1S1
BMP2
BNIP1
BNIP3
BOD1
BRCA2
BRE
BRI3BP
BTBD19
BTG3
BTK
C11ORF54
C11ORF80
C16ORF46
C20ORF24
C2CD4A
C2ORF15
C3
C3ORF17
C8ORF37
C9ORF142
CA13
CACHD1
CANT1
CAPNS1
CASP10
CAV1
CBX5
CCDC107
CCDC115
CCDC124
CCDC174
CCDC25
CCDC57
CCDC94
CCDC97
CCL1
CCL22
CCL5
CCND2
CCND3
CCNG1
CCNL1
CCR7
CCRN4L
CD274
CD38
CD40
CD44
CD48
CD55
CD59
CD63
CD69
CD70
CD74
CD80
CD83
CDC37
CDC42EP4
CDK12
CDK17
CDK6
CDKN1A
CEACAM1
CFL2
CFLAR
CHD2
CHDH
CKS1B
CLCF1
CLIC4
CLTA
COTL1
COX4I1
CR2
CREB1
CREB3
CS
CSAD
CSF1
CSRP2
CTSS
CXCL10
CXCR5
CXXC5
CYB561
CYB561D2
CYB5A
CYBA
CYP7B1
CYTH4
DCLRE1A
DCTN4
DCTPP1
DDA1
DDX26B
DDX47
DENND3
DENND4A
DHPS
DHRS7B
DHX9
DICER1
DLG4
DOCK10
DPP3
DPP4
DPYD
DTX4
DUSP1
DUSP10
DUSP22
DUSP5
E2F3
EBI3
EDN1
EFEMP2
EGR1
EIF2AK3
EIF4A2
ELF3
ELMSAN1
EMC8
ENO1
ENO2
ENO3
EPS8
ERI2
ESCO2
ESPL1
F11R
F2RL3
FAM111A
FAM129A
FAM222A
FAM83G
FARS2
FAS
FASTKD5
FBXO46
FBXW11
FCER2
FCGBP
FCHO1
FCHSD2
FFAR2
FKBP15
FOS
FOSL2
FOXK1
FOXP4
FSCN1
FSTL3
FTH1
G3BP1
G6PD
GABPB1
GADD45B
GALNT18
GALT
GCH1
GCLC
GCLM
GCNT1
GEM
GLI1
GLRX
GNAI2
GPBP1
GPR108
GPR137
GPX4
GRAMD1A
GRIN2A
GRK5
GRN
GSDMD
GSTP1
GTF2E1
H3F3B
HCST
HDGF
HELLS
HES1
HIF1A
HIVEP2
HMGCS1
HMGN1
HMGXB4
HNRNPF
HSP90AA1
HSPA1L
HYPK
ICAM1
IER2
IER3
IER5
IFIH1
IFNAR2
IFT20
IKBKB
IKBKE
IKZF3
IL10
IL12A
IL12B
IL13
IL15
IL15RA
IL1RN
IL23A
IL27
IL32
IL4I1
IL7
INO80C
IQCD
IRF1
IRF2
IRF2BP2
IRF4
IRF7
ITFG3
ITGB1
ITGB2
ITGB8
ITSN2
JUN
JUNB
KCNK5
KCNN2
KDM2A
KIAA0430
KLF10
KLHL21
KLHL5
KMT2E
LAMB3
LARP6
LBR
LDLR
LENG9
LFNG
LGALS1
LGALS3
LHFPL2
LINC01465
LPXN
LRG1
LRRIQ1
LSR
LYRM4
LZIC
MAFF
MAML2
MANBAL
MAP3K11
MAP3K8
MAP4K1
MAPK14
MARCKS
MASTL
MBP
MCM7
MCUR1
MED13
MED15
METTL2B
MID1IP1
MITD1
MLLT11
MLLT6
MMD
MMP9
MRPS24
MTHFD2L
MTHFR
MTMR2
MUC1
MUC17
MYADM
MYB
MYC
MYH9
MYO1G
NAB2
NAMPT
NANS
NBN
NCOA4
NCOA7
NDE1
NDUFA7
NDUFB7
NDUFV2
NEK6
NEK8
NEU1
NFAT5
NFATC2IP
NFE2L2
NFIC
NFKB1
NFKB2
NFKBIA
NFKBIB
NFKBID
NFKBIE
NFKBIZ
NHLRC2
NINJ1
NMNAT1
NOD2
NOTCH2NL
NPRL2
NQO1
NR3C1
NR4A2
NR4A3
NRXN2
NSFL1C
NUB1
NUMB
NXT1
NXT2
OLA1
OXTR
PABPC1
PAFAH2
PAN2
PANX1
PARD6B
PARK7
PARP1
PARP4
PATL1
PAWR
PBX2
PCMTD1
PDCD2L
PDCD5
PDE6D
PDE7A
PDGFRA
PDLIM7
PFDN4
PFKP
PFN1
PGK1
PHLDA1
PIGF
PIK3AP1
PIK3CA
PIM1
PJA2
PLA2G4C
PLAU
PLEC
PLEKHG2
PLK3
PLLP
PLXNB2
PNKD
POLR2A
PPAPDC2
PPIF
PPIL6
PPP1R15A
PPP1R15B
PPP5C
PPP6R3
PPTC7
PQBP1
PRCP
PRDM1
PRKAA1
PRKAB2
PRKCD
PRMT1
PRPF39
PRRT2
PSEN1
PSMA2
PSME1
PSME2
PTEN
PTGER4
PTGIR
PTK6
PTMA
PTP4A2
PTPN1
PTPN12
PTPN2
PTS
PTTG1IP
PWWP2A
PYCARD
QKI
RAB21
RAB27A
RAB30
RAB3IP
RALY
RB1CC1
RBBP4
RBKS
RBM14
RBM17
RBM23
RBM47
RCHY1
REL
RELA
RELB
REPIN1
REV3L
RFFL
RFTN1
RFX2
RFX5
RHOF
RHOG
RILPL2
RIPK2
RMDN1
RNASE4
RND1
RNF126
RNF19A
RNF31
RPL23A
RPS2
RPS27A
RPS28
RSRP1
RTEL1
RUFY1
S100A13
SAR1B
SDC4
SDCBP
SEC24A
SECISBP2
SEMA4C
SENP2
SENP3
SERPINB1
SERPINB8
SERPINH1
SF3B1
SH2D3A
SHC1
SIAH1
SIX5
SKIL
SKP2
SLC11A2
SLC16A1
SLC25A12
SLC25A37
SLC25A45
SLC29A1
SLC2A5
SLC2A6
SLC30A7
SLC31A1
SLC39A10
SLC3A2
SLC41A2
SLC6A6
SLC9A8
SMCHD1
SMG1
SMPD1
SMPD2
SNUPN
SOD1
SOD2
SOX9
SP3
SPAG9
SPATA2L
SPI1
SPPL2A
SQSTM1
SRC
SRCAP
SRGN
SRRT
SS18
SSSCA1
ST6GAL1
ST7
STARD3NL
STAT1
STAT5A
STAT6
STK40
STX10
STX11
STX4
SUB1
SUPT16H
SUPV3L1
SWAP70
SYNGR2
SYS1
TAF1B
TAF1D
TAF4B
TANK
TBC1D12
TBL1X
TBL1XR1
TBRG4
TCF7L2
TESK2
TFCP2
TFE3
TFG
THAP6
THOC1
TICAM1
TIFA
TIMM17B
TINAG
TLCD1
TLDC1
TLR2
TLR9
TMBIM1
TMBIM4
TMEM102
TMEM173
TMEM243
TMEM50A
TMTC2
TNFAIP1
TNFAIP3
TNFRSF10B
TNFRSF1B
TNFRSF4
TNFSF10
TNFSF13
TNFSF13B
TNFSF15
TNIP1
TP53
TP53I3
TP63
TPCN1
TPD52
TPMT
TPRA1
TPT1
TRAF1
TRAF2
TRAF4
TRAPPC10
TRAPPC3
TRIM25
TRIM44
TRIM69
TRIM8
TRIP4
TSG101
TSNARE1
TSPAN14
TSPAN15
TTC23L
TWISTNB
TXNL1
UBB
UBE2Z
UBN2
UBOX5
UBQLN4
UCP2
UGGT1
UGP2
UMPS
UNC13D
UPP1
UQCRC2
USP49
UXS1
VCAM1
VEZF1
VHL
VIM
VPS53
WDR11
WDR31
WDR45B
WDR7
WDR89
WNT10B
WRAP53
WWC1
WWP1
XIAP
YY1
ZBBX
ZBTB1
ZBTB10
ZBTB14
ZBTB25
ZC3H12A
ZCCHC8
ZDHHC24
ZFHX2
ZFP36L1
ZFP91
ZFX
ZHX2
ZMIZ2
ZNF101
ZNF33A
ZNF33B
ZNF436
ZNF436-AS1
ZNF438
ZNF574
ZNF706
ZNF823
ZNRF1

## Sheet: IRF1 Target Gene
Gene
AARSD1
ABHD13
ABHD6
ACBD5
ACBD6
ACP2
ACSL5
ACTN1
ADGRE5
ALDH4A1
ALK
AMOT
ANKEF1
ANKRD29
ANTXR1
APOBEC3B
APOBEC3C
APOBEC3D
APOBEC3F
APOBEC3G
APOL1
APOL2
APOL4
APOL6
AQP1
ARHGEF11
ARNT
ASNSD1
ATF5
ATP5L
ATP6V1E1
B2M
BARD1
BRD7
BRIP1
BST2
BTN3A3
C14ORF159
C14ORF28
C1ORF35
C21ORF91
C2CD2
C3ORF17
C5ORF56
CAMK2G
CASP7
CCBL1
CCNT1
CCNT2
CD274
CDC42SE2
CDCA8
CHAC1
CHAF1B
CHD9
CLASRP
CLK1
CMAHP
CMSS1
CNDP2
CNOT4
COPRS
CPXCR1
CREB3L1
CRKL
CTDSPL2
CYB561
CYB5D2
CYLD
DCAF6
DDX17
DDX60
DHRS13
DHX15
DHX58
DTX3L
E2F5
ECE1
EDARADD
EEF2
ELMSAN1
EMC1
EMC9
EPSTI1
ERAP1
ERAP2
ESR2
EXOC5
FAM111A
FAM189B
FAM208B
FAM26F
FAM58A
FASTKD5
FBXL18
FBXO4
FBXO43
FGFR4
FLT3LG
FMR1
FXN
FXR2
GBP1
GFOD1
GHITM
GIMAP2
GLRX
GLYCTK
GNA13
GOLPH3
GORAB
GPR89B
GRIK5
GSDMB
GSDMD
GTF2B
HBD
HBS1L
HELZ
HIBADH
HIST1H2BC
HIST1H2BD
HLA-E
HLA-H
HNRNPC
HNRNPH2
HNRNPL
HSDL2
HSPH1
IFI35
IFIT1
IFIT2
IFIT3
IFNL1
IFT74
IKZF4
IL12RB1
IL15
IL18BP
IL4I1
ILK
INPP4A
INTS2
IRF2
ISG15
KAT8
KCTD7
KDELC2
KIAA0368
KIAA1191
LCMT1
LDAH
LEF1
LINC00652
LIPC
LOC728752
LPCAT4
LRIF1
LSG1
MCCC1
MCM7
MDGA1
MDK
MIPEP
MIR1282
MIR4278
MITF
MMAA
MOB3C
MOV10
MPC2
MS4A3
MTMR14
NCOR1
NDUFC1
NEDD1
NFATC2IP
NIPSNAP1
NMI
NOD1
NR1H3
NR4A3
NSMCE2
NSUN4
NTM
NUB1
NUDT4
NUP62
OAS3
OAZ1
OGFR
OPTN
PANX1
PARP10
PARP14
PARP3
PARP4
PARP9
PCGF5
PCNA
PEPD
PGK1
PI4K2B
PICALM
PIGG
PISD
PKIB
PLAGL1
PLIN2
PLS1
POLR1B
PRELID2
PRKD2
PRRC2C
PSEN1
PSMA6
PSMB8
PSME1
PSME2
PTPN4
PTPRN2
PYCARD
RAB11A
RAB11B
RAB2B
RARRES3
RBCK1
RBM25
RBM41
RBMX
RCC2
RFFL
RIIAD1
RNF139
RNF168
RNF31
RNPS1
RPL24
RPL34
RPSA
SAMD13
SAMD9
SASH3
SCAMP1
SCN11A
SEPSECS
SHQ1
SLC15A3
SLC25A22
SLC25A29
SLC35F6
SLC5A11
SNORD12C
SNORD44
SNORD78
SNORD79
SNORD82
SOCS1
SP110
SP140L
SPHAR
SPIDR
STAG2
STON2
STRIP1
STXBP5L
TAB3
TAPBPL
TARDBP
TBC1D32
TBX1
TBX3
TCF7L2
TLR3
TMEM140
TMEM248
TMEM65
TMEM67
TNFRSF14
TOR1AIP1
TRDMT1
TRIM21
TRIM34
TRIM44
TRIM5
TSC22D2
TUBB2A
TXN2
UBA7
UBE2L6
UBOX5
UBR1
UBXN7
UNG
USF1
VEZT
VPS54
WARS
WDR18
WDR25
WDR5
WRB
XPO6
YBX3
YPEL2
ZBP1
ZBTB20
ZBTB5
ZEB2
ZFAS1
ZKSCAN3
ZNF333
ZNF425
ZNF484
ZNF493
ZNF518A
ZNF566
ZNF583
ZNF77
ZNFX1
ZSCAN31

## Sheet: ESR1 Target Gene
Gene
AAK1
ABAT
ABCC11
ABCC5
ABHD11
ACAD8
ACTN1
ADGRF1
ADGRG1
AFAP1
AFF1
AGR2
AGR3
AHNAK
AK3
AKAP1
ALDH3B2
AMOTL2
ANGPTL4
ANXA11
ANXA2
ANXA3
ANXA6
APLF
ARFGEF1
ARHGEF19
ARL3
ASS1
ATP10A
B4GALT5
BAIAP2L1
BANP
BCAM
BCAS1
BCL3
BCL6
BFSP1
BICC1
BIRC5
BLNK
BMF
BNC2
BSG
C1QTNF3
C1QTNF6
C4ORF19
CA12
CABIN1
CAP2
CAPN8
CARD10
CASP7
CCDC57
CCL28
CD55
CD82
CDC14A
CDCA7
CERS1
CGN
CHD9
CITED2
CKB
CLCF1
CLEC16A
CLPSL2
CRIP2
CRKL
CSDE1
CTSD
CUEDC1
CYP1A1
CYP1B1
CYP2B6
CYP2R1
CYTH3
DACT2
DDAH1
DDO
DHCR24
DHRS3
DOK7
DSTN
DUSP23
EBAG9
EDN1
ELF3
ELMSAN1
ELP3
ENAH
ENG
ENO1
ERN1
ETNK2
FAM3B
FAM84B
FGF18
FGF9
FKBP4
FOXK1
FOXN1
FREM2
FUNDC1
GALNT7
GAS5
GAS6
GBE1
GCLM
GLCCI1
GLI3
GNMT
GNPNAT1
GPR39
GPR83
GPRC5C
GPT
GPT2
GREB1
GSE1
GUCA2B
GYPC
HAGH
HDAC7
HES1
HIST3H3
HIVEP2
HMBOX1
HOXC10
HSPB8
ID4
IER3
IFRD2
IKBKG
IKZF2
IL17RB
IL1R2
IL6ST
INADL
ITPR1
JAZF1
KALRN
KAT6B
KCNQ5
KCTD15
KLC1
KLF10
KRT13
KRT18
KRT23
KRT8
LAMA5
LCN2
LITAF
LMCD1
LRG1
LRRC17
LRRC52
LSM14A
LYPLAL1
MALL
MAP2K7
MAP6D1
MAT1A
MB
MDM2
ME3
MED13L
MED4
MFGE8
MINOS1
MLPH
MLXIPL
MS4A7
MTDH
MTHFD1L
MYB
MYEOV
MYOF
MYOG
MYOT
NBN
NBPF1
NDST1
NEGR1
NFKB1
NFKBIA
NR1I3
NR2F6
NRAP
NRIP1
NT5C2
NUAK1
OLFML2A
PABPC1
PARVA
PCYT1A
PDCD10
PDCL3
PDZK1
PEMT
PGPEP1
PGR
PGS1
PHACTR1
PIGP
PIM3
PIP
PISD
PLA2G6
PLAC1
PLCE1
PLD1
PLEKHA2
PLEKHA8
PLEKHG3
PMEPA1
POLRMT
PPL
PRDX6
PRKAG2
PRKCD
PRL
PRUNE
PSEN2
PTGDS
PTMA
PTP4A2
PTPRF
PWWP2B
PXK
QPRT
RAB26
RALGPS2
RALY
RARA
RASA3
RASEF
RASGEF1B
RBMS3
RERG
RGPD6
RNF144B
RPRM
SEMA3C
SERBP1
SERPINA1
SERPINA6
SERTAD2
SFXN2
SGK3
SIK1
SIPA1L3
SLC25A30
SLC25A36
SLC25A42
SLC29A1
SLC44A1
SLC7A1
SLC9A8
SLITRK4
SLPI
SMPD3
SPIRE2
SPON1
SPPL2A
SPRY2
SSR3
STAT5B
STC2
SYNJ2
SYT12
TEAD2
TFAP2C
TFF1
TGFA
TIAM2
TJP1
TLE1
TLN2
TMEM144
TNFRSF12A
TNFSF15
TNRC18
TNS3
TP53I11
TPD52L1
TPM3
TPRG1
TRIP10
TUBA1A
TYMP
UBE2R2
ULK4
UNC13D
USP36
VEPH1
VPS37C
VWA2
WDR26
WIPI1
WISP2
WWP1
YPEL2
ZBTB37
ZBTB40
ZC2HC1C
ZKSCAN2
ZNF146
ZNF281
ZNF341
ZNF366
ZNF552
ZNF644
ZNRF1

## Sheet: AR Target Gene
Gene
2021-03-01
2021-03-10
2021-09-03
2021-09-05
2021-09-06
AAA1
AADACL2
AADAT
AAGAB
AARD
AARS
AARS2
AASDH
AASDHPPT
ABAT
ABCA1
ABCA10
ABCA13
ABCA4
ABCA9
ABCB1
ABCB10
ABCB5
ABCC1
ABCC2
ABCC3
ABCC4
ABCD3
ABHD11
ABHD12
ABHD2
ABHD5
ABI1
ABI3
ABI3BP
ABL1
ABL2
ABLIM2
ABLIM3
ABR
ABTB2
ACAA1
ACACA
ACACB
ACAD11
ACAD8
ACADSB
ACAN
ACAP2
ACAT2
ACBD3
ACBD6
ACER1
ACER3
ACF
ACIN1
ACKR2
ACKR3
ACO1
ACOT13
ACOT7
ACOX3
ACPP
ACSL3
ACSL4
ACSL6
ACSM2B
ACSM3
ACSS3
ACTA1
ACTBL2
ACTC1
ACTL6A
ACTL7B
ACTN2
ACTN3
ACTR2
ACTR3
ACTRT2
ACVR2A
ACY1
ACYP1
ACYP2
ADAD1
ADAM10
ADAM15
ADAM19
ADAM20
ADAM22
ADAM28
ADAM29
ADAM32
ADAM7
ADAMTS12
ADAMTS14
ADAMTS15
ADAMTS16
ADAMTS17
ADAMTS18
ADAMTS2
ADAMTS20
ADAMTS3
ADAMTS7
ADAMTS8
ADAMTSL1
ADAMTSL3
ADARB1
ADARB2
ADCK2
ADCK5
ADCY1
ADCY10
ADCY2
ADCY5
ADCY7
ADCY8
ADD1
ADD2
ADD3
ADGRA1
ADGRA3
ADGRB3
ADGRD1
ADGRE1
ADGRF1
ADGRF3
ADGRG6
ADGRG7
ADGRL2
ADGRL3
ADGRL4
ADGRV1
ADH4
ADH6
ADH7
ADI1
ADIG
ADK
ADO
ADORA1
ADORA2B
ADRA1B
ADRA1D
ADRA2A
ADRA2C
ADRB1
ADRB2
ADRB3
ADRBK1
ADRBK2
ADSS
ADTRP
AFAP1
AFAP1L1
AFAP1L2
AFF1
AFF2
AFF3
AFG3L2
AFTPH
AGA
AGAP1
AGAP3
AGBL1
AGBL3
AGBL4
AGGF1
AGK
AGO2
AGO3
AGPAT3
AGPS
AGR2
AGR3
AGT
AGTPBP1
AGTR1
AGTRAP
AHDC1
AHNAK
AHRR
AIDA
AIFM1
AIG1
AIM1
AJAP1
AK5
AKAP1
AKAP10
AKAP12
AKAP13
AKAP14
AKAP17A
AKAP2
AKAP5
AKAP6
AKAP7
AKAP8
AKAP8L
AKNA
AKR1B1
AKR1C2
AKR1D1
AKR7A2
AKT3
ALAS2
ALDH1A1
ALDH1A2
ALDH1A3
ALDH1B1
ALDH1L1
ALDH1L2
ALDH2
ALDH3A2
ALDH4A1
ALDH5A1
ALDH7A1
ALDH8A1
ALDOB
ALG2
ALG6
ALG8
ALK
ALKBH3
ALLC
ALMS1
ALOX5
ALOXE3
ALPI
ALPK3
ALPL
ALX3
AMACR
AMD1
AMELX
AMER2
AMFR
AMIGO1
AMN1
AMOTL1
AMPH
AMTN
ANAPC1
ANAPC13
ANAPC15
ANAPC16
ANGPT1
ANGPT4
ANGPTL1
ANGPTL6
ANK1
ANK2
ANK3
ANKEF1
ANKFN1
ANKFY1
ANKK1
ANKMY2
ANKRA2
ANKRD1
ANKRD10
ANKRD11
ANKRD12
ANKRD13A
ANKRD13C
ANKRD13D
ANKRD18B
ANKRD19P
ANKRD20A11P
ANKRD27
ANKRD28
ANKRD29
ANKRD30A
ANKRD31
ANKRD33
ANKRD33B
ANKRD34C
ANKRD35
ANKRD42
ANKRD44
ANKRD45
ANKRD50
ANKRD52
ANKRD53
ANKRD55
ANKRD9
ANKS3
ANLN
ANO1
ANO10
ANO3
ANO4
ANO6
ANP32A
ANTXR2
ANXA2
ANXA2P1
ANXA2P2
ANXA3
ANXA4
ANXA5
AOAH
AP1G1
AP1M1
AP2A1
AP2A2
AP2B1
AP3B1
AP3D1
AP3M2
AP3S1
AP3S2
AP4B1
AP5S1
APBA1
APBA2
APBB1IP
APBB2
APC
APCDD1
APIP
APLNR
APLP2
APMAP
APOA4
APOBEC3F
APOC2
APOC4
APOD
APOL3
APOL4
APOO
APP
APPBP2
AQP12A
AQP2
AQP9
AQR
AR
ARAF
ARAP1
ARAP2
ARAP3
AREG
ARFGAP2
ARFGEF2
ARFIP1
ARG2
ARGFXP2
ARGLU1
ARHGAP11A
ARHGAP21
ARHGAP24
ARHGAP26
ARHGAP27
ARHGAP28
ARHGAP29
ARHGAP32
ARHGAP35
ARHGAP5
ARHGAP6
ARHGAP8
ARHGDIB
ARHGEF10
ARHGEF11
ARHGEF12
ARHGEF18
ARHGEF26
ARHGEF28
ARHGEF3
ARHGEF37
ARHGEF7
ARID1A
ARID2
ARID5B
ARIH1
ARL13A
ARL13B
ARL14
ARL14EP
ARL16
ARL2BP
ARL4A
ARL4C
ARL4D
ARL5B
ARL8B
ARMC1
ARMC2
ARMC3
ARMC5
ARMC7
ARMC9
ARNT2
ARNTL2
ARPC3
ARR3
ARRDC1-AS1
ARRDC4
ARSE
ARSG
ARSK
ART4
ARV1
ARX
ASAP1
ASAP2
ASB12
ASB13
ASB14
ASB2
ASB4
ASB6
ASB7
ASCC1
ASCC2
ASCC3
ASCL1
ASF1A
ASIC2
ASIC3
ASIC4
ASL
ASNSD1
ASPH
ASPRV1
ASRGL1
ASTL
ASTN2
ASXL2
ATAD2
ATAD2B
ATAD5
ATF2
ATF3
ATF6
ATF7
ATF7IP
ATF7IP2
ATG10
ATG12
ATG14
ATG2B
ATG7
ATIC
ATL1
ATL2
ATL3
ATM
ATMIN
ATOH8
ATP10A
ATP11A
ATP1A3
ATP1B1
ATP1B2
ATP1B3
ATP2A3
ATP2B1
ATP2B2
ATP2B3
ATP2B4
ATP2C2
ATP5EP2
ATP5F1
ATP5G2
ATP6V0A2
ATP6V0A4
ATP6V0D1
ATP6V0E1
ATP6V1B1
ATP6V1E1
ATP6V1G1
ATP6V1H
ATP8A1
ATP8A2
ATP8B2
ATP8B4
ATP9B
ATPAF1
ATRN
ATRNL1
ATRX
ATXN1
ATXN10
ATXN2
ATXN3
ATXN7
AUH
AUTS2
AXDND1
AXIN1
AZGP1
AZIN1
AZU1
B3GALNT1
B3GALNT2
B3GALT1
B3GALT2
B3GALT5
B3GALT6
B3GAT1
B3GNT1
B3GNT6
B3GNTL1
B4GALNT3
B4GALT1
B4GALT5
B4GALT6
B9D1
BAALC
BACE2
BACH2
BAG1
BAG4
BAIAP2
BAIAP2L1
BAMBI
BANP
BARD1
BARHL1
BARHL2
BARX1
BARX2
BASP1
BATF
BAX
BAZ2A
BAZ2B
BBOX1
BBS1
BBS10
BBS2
BBS4
BBX
BCAP31
BCAR4
BCAS1
BCAS3
BCCIP
BCHE
BCKDHB
BCL10
BCL11B
BCL2
BCL2L1
BCL2L11
BCL9
BCLAF1
BCOR
BCORP1
BCYRN1
BDH1
BEND2
BEND5
BEND6
BEND7
BFAR
BHLHA15
BHLHE22
BHLHE40
BHMT2
BICD1
BID
BIVM
BLK
BLNK
BLOC1S4
BMF
BMI1
BMP2K
BMP4
BMP6
BMP8B
BMPR1A
BMPR1B
BMPR2
BMS1
BNC1
BNC2
BNIP3
BOC
BOLA2
BORA
BPGM
BPIFA3
BPIFA4P
BPIFB1
BPIFB4
BPIFC
BPTF
BRCA2
BRD1
BRD2
BRD3
BRD4
BRD7
BRD8
BRDT
BRE
BRINP3
BRIP1
BRMS1L
BRSK1
BRWD1
BTBD1
BTBD17
BTBD3
BTBD7
BTBD8
BTBD9
BTC
BTD
BTF3L4
BTG3
BTN2A2
BTN3A3
BTNL3
BTNL9
BTRC
BUB3
BVES
BZW2
C10ORF107
C10ORF11
C10ORF113
C10ORF12
C10ORF71
C10ORF88
C10ORF90
C11ORF24
C11ORF40
C11ORF48
C11ORF49
C11ORF53
C11ORF57
C11ORF63
C11ORF68
C11ORF70
C11ORF80
C11ORF95
C12ORF29
C12ORF42
C12ORF56
C12ORF57
C12ORF65
C12ORF71
C12ORF74
C12ORF76
C14ORF105
C14ORF132
C14ORF159
C14ORF166
C14ORF2
C14ORF80
C15ORF27
C15ORF32
C15ORF40
C15ORF41
C15ORF43
C15ORF48
C15ORF54
C16ORF45
C16ORF54
C16ORF72
C16ORF90
C17ORF53
C17ORF58
C17ORF67
C17ORF70
C17ORF82
C18ORF54
C19ORF45
C19ORF47
C19ORF48
C1D
C1GALT1
C1ORF101
C1ORF110
C1ORF115
C1ORF116
C1ORF168
C1ORF189
C1ORF198
C1ORF21
C1ORF43
C1ORF54
C1ORF87
C1ORF94
C1QBP
C1QTNF3
C1QTNF7
C20ORF85
C21ORF33
C21ORF59
C22ORF24
C22ORF34
C22ORF42
C2CD2
C2CD4A
C2CD5
C2ORF48
C2ORF68
C2ORF76
C2ORF88
C3ORF20
C3ORF30
C3ORF58
C3ORF79
C4ORF22
C4ORF3
C4ORF33
C4ORF36
C4ORF45
C4ORF47
C5ORF15
C5ORF24
C5ORF28
C5ORF30
C5ORF42
C5ORF45
C5ORF46
C6ORF201
C6ORF222
C6ORF58
C6ORF89
C7ORF25
C7ORF26
C7ORF60
C8B
C8ORF31
C8ORF4
C8ORF46
C9ORF106
C9ORF152
C9ORF3
C9ORF64
C9ORF69
C9ORF85
C9ORF89
CA10
CA12
CA13
CA4
CA6
CA8
CAAP1
CABIN1
CABLES1
CACHD1
CACNA1A
CACNA1B
CACNA1C
CACNA1D
CACNA1G
CACNA1S
CACNA2D1
CACNA2D3
CACNA2D4
CACNB2
CACNB3
CACNG1
CACNG2
CACNG3
CACNG5
CACNG6
CACNG7
CADPS
CADPS2
CALB1
CALB2
CALD1
CALM1
CALM2
CALML4
CALML5
CALN1
CAMK1
CAMK1G
CAMK2B
CAMK2D
CAMK2N2
CAMKK2
CAMKMT
CAMP
CAMSAP2
CAMTA1
CAP2
CAPG
CAPN1
CAPN10
CAPN13
CAPN14
CAPN3
CAPN7
CAPN9
CAPRIN1
CAPS2
CAPZB
CARD11
CARD18
CASC10
CASC3
CASC5
CASK
CASP2
CASQ2
CASZ1
CATSPER3
CATSPERB
CATSPERD
CAV1
CAV2
CAV3
CBFA2T2
CBFA2T3
CBL
CBLB
CBLC
CBLL1
CBLN2
CBLN4
CBR4
CBWD2
CBWD5
CBX2
CBX4
CBX8
CBY1
CBY3
CC2D1A
CC2D1B
CC2D2A
CCAR2
CCBE1
CCBL2
CCDC109B
CCDC110
CCDC112
CCDC127
CCDC129
CCDC141
CCDC155
CCDC171
CCDC172
CCDC174
CCDC178
CCDC18
CCDC181
CCDC183
CCDC186
CCDC23
CCDC33
CCDC34
CCDC38
CCDC42
CCDC51
CCDC53
CCDC54
CCDC57
CCDC6
CCDC74A
CCDC81
CCDC85C
CCDC88A
CCDC88B
CCDC88C
CCDC93
CCER1
CCHCR1
CCK
CCKAR
CCL1
CCL20
CCL27
CCL3L1
CCL4
CCL7
CCNA1
CCNA2
CCND1
CCND2
CCNE1
CCNE2
CCNF
CCNH
CCNJ
CCNJL
CCNL1
CCNL2
CCNY
CCP110
CCPG1
CCR3
CCR7
CCR9
CCSER1
CCSER2
CCT6B
CCT6P3
CCZ1
CCZ1B
CD163L1
CD164
CD180
CD1B
CD1E
CD200R1L
CD209
CD22
CD226
CD24
CD244
CD2BP2
CD300E
CD34
CD36
CD38
CD3E
CD40LG
CD46
CD55
CD58
CD63
CD69
CD7
CD70
CD79B
CD82
CD83
CD86
CD9
CD93
CD96
CD99
CDC14B
CDC25A
CDC27
CDC34
CDC42BPA
CDC42EP3
CDC42EP4
CDC45
CDC7
CDCA2
CDCA7
CDCA7L
CDCA8
CDH1
CDH10
CDH11
CDH12
CDH13
CDH15
CDH18
CDH19
CDH2
CDH22
CDH23
CDH24
CDH26
CDH4
CDH5
CDH6
CDH7
CDH9
CDHR2
CDHR3
CDHR5
CDK10
CDK13
CDK14
CDK18
CDK19
CDK2
CDK2AP1
CDK5R1
CDK5RAP2
CDK7
CDK8
CDKAL1
CDKL1
CDKL2
CDKN2B
CDKN2B-AS1
CDON
CDS1
CDS2
CDV3
CDY2B
CDYL
CDYL2
CEACAM4
CEACAM6
CEBPZ
CECR5-AS1
CECR6
CELF4
CELSR1
CELSR2
CEMIP
CENPE
CENPF
CENPJ
CENPK
CENPL
CENPN
CENPO
CENPP
CENPW
CEP112
CEP131
CEP135
CEP164
CEP170
CEP170B
CEP192
CEP350
CEP44
CEP55
CEP57L1
CEP83
CEP89
CERS3
CERS6
CES3
CETN3
CETN4P
CFAP43
CFAP46
CFAP47
CFAP54
CFAP58
CFAP61
CFAP69
CFAP70
CGNL1
CHAF1B
CHAT
CHD1
CHD2
CHD3
CHD6
CHD9
CHERP
CHIA
CHKA
CHL1
CHML
CHMP1B
CHMP2A
CHMP2B
CHMP4C
CHMP7
CHN2
CHORDC1
CHP1
CHPF
CHPF2
CHRDL1
CHRM3
CHRNA2
CHRNA3
CHRNA5
CHRNA7
CHRNB3
CHRND
CHST1
CHST10
CHST11
CHST13
CHST4
CHST8
CHST9
CHSY1
CHSY3
CIDEA
CIRH1A
CISH
CIT
CITED1
CITED2
CITED4
CKAP2L
CKAP5
CKM
CKMT1B
CLASP1
CLASP2
CLASRP
CLC
CLCA3P
CLCN7
CLDN1
CLDN10
CLDN12
CLDN14
CLDN15
CLDN3
CLDN8
CLEC11A
CLEC16A
CLEC4E
CLEC4G
CLEC4M
CLEC7A
CLIC5
CLIP1
CLIP2
CLIP4
CLMN
CLN8
CLNK
CLOCK
CLPB
CLPP
CLPTM1L
CLPX
CLRN1-AS1
CLTA
CLTB
CLTC
CLU
CLUAP1
CLUH
CLVS2
CLYBL
CMBL
CMIP
CMKLR1
CMPK2
CMSS1
CMTM3
CMTM8
CNBD1
CNEP1R1
CNGA1
CNGA3
CNGB3
CNIH3
CNKSR3
CNN3
CNNM1
CNOT2
CNOT4
CNOT6L
CNPY2
CNR1
CNRIP1
CNTFR
CNTLN
CNTN1
CNTN3
CNTN4
CNTN5
CNTNAP2
CNTNAP4
CNTNAP5
COA1
COBL
COBLL1
COG1
COG2
COG3
COG6
COL10A1
COL12A1
COL18A1
COL21A1
COL22A1
COL23A1
COL24A1
COL25A1
COL26A1
COL27A1
COL28A1
COL4A1
COL4A2
COL4A3BP
COL4A5
COL5A1
COL5A2
COL6A1
COL6A3
COL8A1
COL9A1
COLCA2
COLEC11
COLGALT2
COLQ
COMMD10
COMMD4
COMMD6
COMMD8
COMMD9
COPB1
COPS7A
COPS7B
COPS8
COQ10B
COQ7
CORIN
CORO2A
CORO2B
CORO6
CORT
COX20
COX5B
COX6A2
COX7B2
CP
CPAMD8
CPB1
CPB2
CPEB2
CPEB3
CPEB4
CPLX2
CPLX4
CPNE1
CPNE2
CPNE4
CPNE5
CPNE8
CPO
CPPED1
CPQ
CPSF7
CPT1A
CPXCR1
CPZ
CRABP2
CRACR2A
CRADD
CRB2
CRBN
CRCP
CREB3L1
CREB5
CREBBP
CREG2
CRELD2
CRH
CRHR1
CRHR1-IT1
CRIM1
CRISP2
CRISP3
CRISPLD1
CRISPLD2
CRKL
CRNN
CROT
CRTAM
CRTAP
CRTC1
CRY1
CRYAA
CRYBG3
CRYZL1
CSAD
CSF1
CSF1R
CSGALNACT1
CSMD1
CSMD2
CSMD3
CSNK1A1
CSNK1G3
CSNK2A1
CSPG4
CSRNP1
CSRP2
CST8
CSTF2T
CT45A6
CT55
CTAGE1
CTAGE4
CTAGE6
CTBP1
CTBP2
CTGF
CTIF
CTNNA1
CTNNA2
CTNNA3
CTNNAL1
CTNNB1
CTNNBIP1
CTNNBL1
CTNND1
CTNND2
CTPS1
CTSC
CTSG
CTSL3P
CTSW
CTTNBP2
CTTNBP2NL
CTXN3
CUL1
CUL2
CUL3
CUL5
CUX1
CUX2
CWC22
CWC25
CWF19L2
CX3CR1
CXCL1
CXCL2
CXCL5
CXCL8
CXCR6
CXORF21
CXORF23
CXORF51A
CXORF57
CXORF58
CYB5A
CYB5R3
CYB5R4
CYBA
CYBRD1
CYC1
CYFIP2
CYLC1
CYLC2
CYMP
CYP19A1
CYP1A1
CYP1A2
CYP1B1-AS1
CYP24A1
CYP26B1
CYP2A6
CYP2J2
CYP2S1
CYP2U1
CYP3A43
CYP3A7
CYP46A1
CYP4A11
CYP4B1
CYP4F22
CYP4V2
CYP7B1
CYTH1
CYTH3
DAAM1
DAAM2
DAB1
DAB2IP
DACH1
DACH2
DACT1
DACT2
DACT3
DAGLA
DAOA
DAPK1
DAPL1
DARS
DAZAP1
DBH
DBI
DBN1
DBNDD1
DBR1
DBT
DBX2
DCAF11
DCAF6
DCAF8L1
DCANP1
DCC
DCD
DCDC2
DCK
DCLK2
DCLRE1B
DCN
DCTN6
DCUN1D1
DCUN1D3
DCUN1D4
DCUN1D5
DDAH1
DDB1
DDC
DDHD1
DDI2
DDIT4
DDO
DDX10
DDX17
DDX18
DDX31
DDX39A
DDX3X
DDX47
DDX49
DDX52
DDX59
DDX60
DEDD2
DEFA1
DEFB114
DEFB121
DEFB128
DEFB134
DENND1A
DENND5B
DENR
DEPDC1
DEPDC1B
DEPDC7
DERL1
DES
DEXI
DFNB31
DGCR14
DGCR2
DGKB
DGKD
DGKG
DGKI
DHDDS
DHDH
DHFR
DHODH
DHRS1
DHRS12
DHRS3
DHRS4L1
DHTKD1
DHX15
DHX33
DHX34
DHX36
DIAPH2
DIAPH3
DICER1
DIO2
DIO3
DIP2B
DIP2C
DIRAS2
DIRAS3
DIRC3
DIS3L2
DISC1
DISP1
DKFZP434H168
DKK3
DKK4
DLD
DLEC1
DLEU2
DLEU7
DLG2
DLG5
DLGAP1
DLK1
DLL1
DMBT1
DMC1
DMD
DMRTA1
DMXL1
DMXL2
DNAAF2
DNAAF5
DNAH1
DNAH11
DNAH14
DNAH17
DNAH2
DNAH5
DNAH6
DNAH7
DNAH8
DNAH9
DNAI2
DNAJA3
DNAJB12
DNAJB3
DNAJB4
DNAJB9
DNAJC1
DNAJC12
DNAJC15
DNAJC17
DNAJC19
DNAJC28
DNAJC5B
DNAJC6
DNAJC9
DNAL1
DNASE1
DNASE2B
DNER
DNM1L
DNM3
DNMBP
DNMT1
DNMT3A
DNMT3L
DNTTIP2
DOCK1
DOCK2
DOCK4
DOCK5
DOCK7
DOCK8
DOK2
DOK6
DOLPP1
DOPEY1
DOPEY2
DPAGT1
DPEP3
DPF2
DPH5
DPP10
DPP4
DPP6
DPP9
DPT
DPY19L2P2
DPY19L2P4
DPY19L4
DPYD
DPYS
DPYSL2
DPYSL5
DR1
DRAM1
DRAP1
DRD2
DRD3
DRD4
DRD5
DRG1
DRGX
DSC2
DSC3
DSCAM
DSCAML1
DSCC1
DSCR3
DSCR8
DSE
DSEL
DSG1
DSG2
DSG4
DSPP
DTD1
DTL
DTNB
DTWD2
DTX1
DUOX1
DUSP1
DUSP10
DUSP18
DUSP19
DUSP27
DUSP5
DUSP7
DUSP9
DUT
DVL3
DYM
DYNAP
DYNC1I1
DYNC1I2
DYNC2H1
DYNC2LI1
DYNLL1
DYNLRB1
DYNLRB2
DYRK1B
DYRK2
DYSF
DZANK1
DZIP1
DZIP1L
E2F1
E2F3
E2F7
E2F8
EARS2
EBF1
EBF2
ECE1
ECE2
ECEL1
ECI2
ECT2
EDA
EDARADD
EDC3
EDDM3B
EDEM1
EDEM2
EDF1
EDN1
EDN3
EDNRA
EEF1A2
EEF1E1
EEF2K
EEF2KMT
EEFSEC
EEPD1
EFCAB11
EFCAB2
EFCAB6
EFCAB7
EFCC1
EFHB
EFHC1
EFNA1
EFNA5
EFNB1
EFNB2
EFR3A
EFR3B
EFTUD1
EGF
EGFLAM
EGFR
EGLN1
EGLN3
EHBP1
EHBP1L1
EHD4
EHF
EID2B
EIF1
EIF1AX
EIF1AY
EIF2AK1
EIF2AK3
EIF2B5
EIF3D
EIF3H
EIF4E
EIF4E1B
ELAC1
ELAVL3
ELAVL4
ELF2
ELF3
ELF5
ELK1
ELL2
ELMO1
ELMO2
ELMOD2
ELN
ELOVL3
ELOVL4
ELOVL7
ELP3
ELP4
ELP5
ELSPBP1
EMB
EMC2
EMC7
EMCN
EMID1
EML1
EML4
EML5
EML6
EN2
ENG
ENHO
ENO2
ENOX1
ENOX2
ENPEP
ENPP2
ENPP3
ENPP4
ENPP7
ENTHD1
ENTPD2
ENTPD3
ENTPD6
ENY2
EPAS1
EPB41
EPB41L2
EPB41L4B
EPB41L5
EPC1
EPG5
EPHA1
EPHA10
EPHA2
EPHA3
EPHA4
EPHA5
EPHA7
EPHB1
EPHB2
EPHB4
EPHX1
EPHX4
EPM2A
EPN1
EPN2
EPN3
EPRS
EPS15
EPS15L1
EPS8
EPS8L1
EPS8L3
EPSTI1
EPT1
EQTN
ERAL1
ERAP1
ERBB2IP
ERBB4
ERC2
ERC2-IT1
ERCC4
ERCC5
ERCC6
ERCC8
EREG
ERGIC1
ERGIC3
ERI1
ERI3
ERICH1
ERICH5
ERICH6B
ERMARD
ERMP1
ERN1
ERO1L
ERO1LB
ERP44
ERRFI1
ESF1
ESPN
ESR1
ESRP1
ESRRB
ESRRG
ETF1
ETFA
ETNK1
ETNK2
ETS1
ETV3
ETV6
EVA1C
EVI5
EVX2
EWSAT1
EXO1
EXOC1
EXOC2
EXOC3
EXOC3L2
EXOC3L4
EXOC4
EXOC6
EXOG
EXOSC6
EXT1
EXT2
EYA1
EYA2
EYA3
EYS
F11
F11R
F13A1
F9
FABP12
FABP2
FABP5
FABP7
FABP9
FADS3
FAF1
FAIM
FAM105A
FAM107B
FAM110A
FAM110B
FAM110C
FAM114A1
FAM117B
FAM118A
FAM118B
FAM120A
FAM120B
FAM126A
FAM129A
FAM131C
FAM134B
FAM134C
FAM135A
FAM135B
FAM13A
FAM13A-AS1
FAM13B
FAM13C
FAM149A
FAM150B
FAM151B
FAM155A
FAM160A2
FAM160B1
FAM163A
FAM167B
FAM169A
FAM170A
FAM171A1
FAM171B
FAM172A
FAM174A
FAM175B
FAM178A
FAM181A
FAM189A1
FAM189A2
FAM193A
FAM196B
FAM19A1
FAM19A2
FAM19A5
FAM201A
FAM205A
FAM208A
FAM208B
FAM20C
FAM210B
FAM213A
FAM214A
FAM216A
FAM218A
FAM219B
FAM26D
FAM26F
FAM27L
FAM3B
FAM3C
FAM43A
FAM46C
FAM47C
FAM47E
FAM49A
FAM53A
FAM53B
FAM53C
FAM60A
FAM63A
FAM64A
FAM65A
FAM65B
FAM66A
FAM69C
FAM71B
FAM71C
FAM71F1
FAM81A
FAM83B
FAM84B
FAM8A1
FAM91A1
FAM92A1
FAM96B
FAM9B
FAM9C
FAN1
FANCC
FANCL
FAR2
FARP1
FARS2
FAS
FASTK
FASTKD2
FAT1
FAT2
FATE1
FAXDC2
FBL
FBN1
FBN2
FBN3
FBP1
FBXL16
FBXL17
FBXL18
FBXL4
FBXL5
FBXL7
FBXO10
FBXO15
FBXO16
FBXO21
FBXO25
FBXO27
FBXO34
FBXO38
FBXO44
FBXO46
FBXO6
FBXO9
FBXW11
FBXW2
FBXW8
FCF1
FCHO2
FCHSD2
FCN3
FCRL5
FCRLA
FEM1C
FEN1
FER
FER1L4
FERD3L
FERMT2
FERMT3
FEZF2
FFAR2
FFAR4
FGA
FGD1
FGD2
FGD4
FGF1
FGF12
FGF14
FGF17
FGF18
FGF2
FGF6
FGF7
FGF9
FGFR1
FGFR2
FGFR3
FGGY
FGL2
FHAD1
FHDC1
FHIT
FHOD3
FIBCD1
FIBP
FICD
FIG4
FIGN
FILIP1L
FIP1L1
FJX1
FKBP11
FKBP1A
FKBP5
FKBP9
FKTN
FLCN
FLG2
FLI1
FLII
FLJ41733
FLJ44796
FLJ45079
FLJ46838
FLNB
FLNC
FLOT2
FLT3LG
FMN1
FMN2
FMNL1
FN1
FNBP1L
FNBP4
FNDC3B
FNIP2
FOXB1
[truncated: 4,280 more rows]

## Sheet: POU5F1 Target Gene
Gene
ALDH1A2
ALOXE3
ARID2
ATF7IP
BRINP2
C15ORF48
C1R
CA2
CACHD1
CACNA2D1
CBY1
CCDC63
CDX1
CHFR
CNR2
CRYZL1
DHRS3
DHX8
DNAJB5
DPPA4
DUSP12
EEF1A1
ELL
ESRP1
ETV5
FAT1
FBXO40
FGF2
FGFR2
GABRA5
GADD45G
GDF3
GIMAP5
GRID2
H2AFY
HESX1
HIST1H1B
HIST1H1C
HIST1H2AD
HIST1H2BE
HIST1H2BF
HIST1H3B
HIST1H3D
HIST1H4J
HORMAD2
HOXB1
IER5L
INO80C
ITSN1
KDM2B
KPNA2
LCORL
LEFTY1
LINGO1
LRRTM3
MRPL44
MRPL48
MYNN
NANOG
NCAM2
NCOR2
NDUFS7
NEUROG1
NFAT5
NFE2L3
NOTCH1
NPAS4
NR6A1
NRARP
PDCL
PIPOX
PLAC8
PLEKHG2
PLXNA2
POLR2A
POU6F1
PPP1R15B
PPP2R3A
PTPN2
RBM17
REST
RIF1
RNF219
SCN1A
SCNN1A
SET
SFRP2
SHF
SMARCAD1
SNRPN
SNX16
SRRM4
SSBP2
STAT3
TBL1X
TGIF2
THEM4
TJP2
TLE1
TNKS1BP1
TRIM24
TUT1
UBC
USP44
ZBTB4
ZFP36L1
ZNF428
ZNF436
ZNF536

## Sheet: YY1 Target Gene
Gene
2021-03-01
2021-09-01
2021-09-06
2021-09-07
2021-09-15
AAGAB
AARS
AARS2
ABCA12
ABCA5
ABCB8
ABCC5
ABCC8
ABCD2
ABCE1
ABHD11-AS1
ABHD12
ABHD14B
ABL2
ABRACL
ABTB2
ACAD11
ACADM
ACBD5
ACIN1
ACO2
ACOT7
ACP2
ACRBP
ACSS2
ACTB
ACTL6B
ACTR3B
ACTR8
ACVRL1
ACYP2
ADAMTS14
ADAMTS4
ADARB2
ADCK4
ADCY9
ADGRE5
ADGRL1
ADI1
ADK
ADNP
ADO
AFTPH
AGBL4
AGO2
AGO3
AGPAT1
AGPS
AGTPBP1
AHCYL1
AHCYL2
AHDC1
AHI1
AHNAK
AIG1
AIP
AK1
AKAP8
AKAP8L
AKT1S1
ALDH7A1
ALDOC
ALG1
ALG12
ALG3
ALG8
ALK
ALKBH3
ALKBH8
ALS2CR12
AMD1
AMPD3
ANAPC1
ANAPC15
ANGEL2
ANK3
ANKFY1
ANKH
ANKLE1
ANKRD13C
ANKRD17
ANKRD28
ANKRD37
ANKRD54
ANKRD6
ANP32B
ANXA1
ANXA9
AP1G1
AP2B1
AP3B2
AP3D1
AP5M1
APBB2
APC
APEX1
APH1A
API5
APOA2
APOBEC3B
APOBEC3C
APOBEC3F
APOBR
APOC1
APOM
APP
APPBP2
ARC
ARCN1
ARF4
ARFGAP2
ARG2
ARHGAP18
ARHGEF18
ARID2
ARID4A
ARMC6
ARMC8
ARNT
ARPC1A
ASAP1
ASAP2
ASAP3
ASB9
ASCL2
ASGR1
ASIC1
ASNA1
ASPHD1
ASTL
ASUN
ASXL1
ATE1
ATF1
ATF4
ATF7IP
ATG13
ATG14
ATG4C
ATG4D
ATG7
ATP13A1
ATP5A1
ATP5G1
ATP5G2
ATP5J2
ATP5L
ATP5S
ATP5SL
ATP6V0A1
ATP6V0C
ATP6V1G2
ATP8B1
ATPAF2
ATRAID
ATRX
ATXN10
ATXN2
AUP1
AURKA
AVEN
AVPI1
AXIN2
AZGP1
B3GNT2
B3GNT3
B4GALT3
BABAM1
BAD
BAG4
BAK1
BANP
BAZ2B
BBIP1
BBS1
BBX
BCAS2
BCAS3
BCKDK
BCL2L13
BCL7A
BCLAF1
BDNF
BEST4
BLK
BLM
BLOC1S2
BLOC1S5
BNIP1
BOP1
BPTF
BRIP1
BRIX1
BRK1
BRPF3
BRSK1
BSDC1
BTBD11
BTD
BTF3
BTN2A1
C10ORF95
C11ORF30
C11ORF84
C12ORF43
C12ORF57
C14ORF159
C14ORF93
C15ORF26
C15ORF27
C15ORF41
C15ORF53
C15ORF61
C16ORF59
C16ORF62
C16ORF74
C17ORF59
C17ORF89
C18ORF25
C18ORF32
C18ORF54
C19ORF43
C19ORF53
C19ORF60
C19ORF66
C1ORF174
C1QL4
C20ORF196
C20ORF27
C20ORF96
C21ORF33
C2CD5
C3ORF14
C4ORF22
C5ORF15
C5ORF49
C6ORF226
C6ORF48
C7ORF25
C7ORF55
C7ORF60
C8ORF37
C9ORF156
C9ORF72
C9ORF78
CA5A
CACNA1E
CACYBP
CALM1
CAMK1D
CAMKMT
CAMLG
CAMTA2
CAP1
CAPRIN1
CAPRIN2
CAPZA1
CARD9
CASC5
CASD1
CASP9
CBL
CBX5
CC2D2A
CCAR1
CCDC117
CCDC12
CCDC121
CCDC124
CCDC132
CCDC142
CCDC153
CCDC167
CCDC170
CCDC174
CCDC18
CCDC25
CCDC40
CCDC43
CCDC47
CCDC58
CCDC59
CCDC71
CCL20
CCM2
CCNK
CCNL2
CCP110
CCSER2
CCT3
CCT6P1
CD109
CD151
CD160
CD2BP2
CD40
CDC23
CDC26
CDC34
CDC45
CDK12
CDK14
CDK5RAP2
CDK8
CDKAL1
CDKN2D
CELF5
CELSR3
CENPB
CENPL
CENPT
CEP250
CEP290
CEP350
CFAP36
CFAP69
CHCHD2
CHCHD6
CHD2
CHD3
CHD7
CHD9
CHEK2
CHERP
CHFR
CHM
CHN1
CHRAC1
CHST3
CIB2
CIPC
CIRBP
CLCN4
CLDN19
CLIC6
CLIP1
CLIP4
CLK4
CLN3
CLPB
CLTC
CNKSR1
CNKSR3
CNNM2
CNOT1
CNOT10
CNOT2
CNOT4
CNPY4
CNTD2
CNTLN
COA3
COA6
COG2
COG4
COIL
COL19A1
COL22A1
COL27A1
COL4A3BP
COMMD1
COMMD9
COPS2
COPS3
COPS4
COPS5
COPS7A
COPS8
COPZ1
COQ6
COQ9
COX10
COX20
COX7B
COX7C
COX8A
CPE
CPEB4
CPNE9
CPSF2
CPSF6
CR1L
CR2
CRADD
CRAT
CRELD2
CREM
CRK
CRKL
CRYZ
CSDE1
CSNK1A1
CSTF1
CSTF2T
CSTF3
CTDNEP1
CTIF
CTNNBL1
CUEDC2
CUL7
CUX1
CWC22
CWC27
CXCL16
CXXC1
CYB561A3
CYB5D2
CYB5R3
CYB5RL
CYHR1
CYP1A1
CYTH1
CYTH2
DAAM1
DAPK1
DAPK3
DARS2
DCAF13
DCAF15
DCTN1
DCTN4
DCUN1D1
DCUN1D2
DDAH2
DDX17
DDX23
DDX39B
DDX3X
DDX41
DDX47
DDX51
DEDD
DEF6
DEK
DENND1C
DENND2C
DENND5B
DENND6A
DEPTOR
DERL3
DESI1
DESI2
DGKH
DHPS
DHX30
DHX35
DHX36
DHX38
DIAPH1
DIDO1
DLC1
DLG4
DLGAP1
DNAAF3
DNAAF5
DNAH14
DNAJA3
DNAJB11
DNAJC1
DNAJC11
DNAJC7
DNAJC8
DNLZ
DNM1
DNMT1
DNMT3A
DNMT3B
DNTTIP2
DOCK7
DOHH
DOLK
DOT1L
DPAGT1
DPF1
DPF2
DPH1
DPH3
DPP9
DPY19L2
DPY30
DPYD
DR1
DSN1
DTNB
DTNBP1
DTX4
DUS3L
DUSP26
DXO
DYNC1H1
E2F3
EBNA1BP2
ECE2
ECH1
ECI1
ECT2L
EDC4
EEF1A1
EEF1E1
EEF1G
EEF2
EEF2K
EEPD1
EFCAB10
EFCAB2
EFHB
EFHC1
EFR3B
EHBP1L1
EHD1
EHD3
EIF2B5
EIF2S1
EIF2S3
EIF3B
EIF3D
EIF3E
EIF3F
EIF3H
EIF3L
EIF4A1
EIF4B
EIF4ENIF1
EIF4G2
EIF4H
EIF5
ELAVL1
ELP4
EMC6
EMG1
ENSA
ENTPD6
EP300
EPB41L4A
EPC1
EPHB4
EPHX4
EPN2
EPS15
ERAL1
ERBB2
ERBB2IP
ERCC1
ERCC8
ERH
ERI3
ERICH6
ESCO1
ESCO2
ETAA1
ETHE1
ETV1
EWSR1
EXD2
EXOC4
EXOC6B
EXOC7
EXOSC1
EXOSC10
EXOSC2
FAF2
FAHD1
FAM104A
FAM117A
FAM118A
FAM149B1
FAM172A
FAM174B
FAM175B
FAM179B
FAM193B
FAM19A2
FAM204A
FAM219B
FAM65C
FAM73A
FAM78B
FAM83F
FAM86C1
FAM89A
FAM98A
FANCB
FANCE
FANCL
FARS2
FARSA
FASTK
FASTKD2
FBRSL1
FBXL18
FBXL19
FBXO28
FBXO30
FBXO36
FBXO4
FBXO42
FDPS
FDX1L
FEM1A
FGF8
FGFR4
FIG4
FIZ1
FKBP5
FKTN
FNBP4
FNDC1
FNDC3B
FOPNL
FOSB
FOXF1
FOXO4
FPGS
FPR3
FRAT1
FRG1B
FRZB
FSCN1
FTO
FTSJ1
FTSJ2
FTSJ3
FUBP1
FUK
FUT2
FUT5
FUZ
FXR1
FZD7
FZD8
FZR1
GAB1
GABPA
GABPB2
GAD2
GADD45GIP1
GAL3ST3
GALC
GAP43
GAPDH
GATA2
GATA5
GATB
GBA
GBX1
GDF11
GDI1
GFM1
GGA2
GIMAP2
GIMAP6
GIT2
GK5
GLG1
GLIS3
GLTSCR2
GLYR1
GMDS
GMNN
GMPR
GNA14
GNAI1
GNAI2
GNAI3
GNB2
GNG3
GNG4
GNL3
GNL3L
GNPAT
GON4L
GOSR1
GOSR2
GPAA1
GPATCH11
GPATCH3
GPATCH4
GPATCH8
GPBP1
GPBP1L1
GPC6
GPHN
GPN1
GPR107
GPR155
GPR45
GPR55
GPR87
GPSM2
GPX8
GRIK5
GRIPAP1
GRWD1
GTF2H3
GTF2IRD2
GTF3C2
GTF3C6
GTPBP2
GTPBP3
GTPBP8
GUSB
H2AFB1
HACD2
HAPLN1
HAS2
HAUS7
HBA2
HBS1L
HCFC1
HDAC2
HDLBP
HEATR5A
HEATR6
HEXIM1
HGSNAT
HIAT1
HIF1AN
HIGD2B
HINT1
HIPK1
HIST1H2AC
HIST1H3E
HIST1H3F
HIST1H4H
HIVEP1
HIVEP3
HLX
HMGXB4
HMOX2
HNF4A
HNRNPA2B1
HNRNPC
HNRNPK
HNRNPM
HNRNPUL1
HOXA1
HOXA4
HOXC9
HPS5
HRK
HSD17B10
HSDL2
HSF1
HSPA1L
HSPA4
HSPA6
HSPA9
HSPBP1
HTATSF1
HTR3B
HTR7
HTRA1
HTT
HYAL2
IAH1
ICT1
ID4
IDH3B
IDI1
IER2
IER5L
IFIT5
IFT43
IFT80
IGBP1
IGDCC3
IGFN1
IK
IKBKB
IL1A
IL2RB
IL6
IL6R
IMMT
IMP4
ING4
INO80B
INO80E
INPP4B
INPP5F
INPP5J
INSC
INTS1
INTS3
INTS6
INTS8
INTS9
INTU
IPCEF1
IPO4
IPO8
IPPK
IQCH
IQUB
ISCA2
IST1
ISYNA1
ITFG1
ITGB4
ITLN1
ITM2B
ITPR1
IWS1
JARID2
JMJD1C
JMJD7
JRK
JUNB
KANSL1L
KANSL2
KAT2B
KAT5
KAT6A
KAT6B
KAT7
KAT8
KATNB1
KCNB1
KCNC4
KCND1
KCNH1
KCNJ2
KCNQ3
KCNQ5
KCNT2
KCTD12
KCTD16
KDM2A
KDM3A
KDM5C
KDM6A
KDM6B
KHDRBS1
KIAA0195
KIAA0232
KIAA0319L
KIAA0368
KIAA0391
KIAA0753
KIAA0907
KIAA1033
KIAA1328
KIDINS220
KIF15
KIF1BP
KIF20A
KIF5B
KLF4
KLF6
KLHDC10
KLHL5
KMT2C
KMT2E
KNSTRN
KPNA6
KPTN
KRAS
L3MBTL3
LACE1
LAMA3
LAMC1
LARS2
LBH
LCK
LCN2
LCP1
LDAH
LDB1
LDLRAD2
LDOC1L
LEF1
LEMD2
LEO1
LETM2
LGALS9
LHFPL2
LIN28B
LIN52
LIN7A
LIN9
LINC00652
LIX1L
LMAN1
LMOD1
LNPEP
LOC100129361
LOC63930
LONP1
LPCAT3
LPIN1
LRCH1
LRGUK
LRP12
LRRC16A
LRRC29
LRRC41
LRRC46
LRRC48
LRRTM3
LSM3
LSM7
LTBP1
LUC7L3
LUZP6
LYRM7
LYZL6
MACF1
MADD
MAEA
MAF
MAFK
MAGI2
MALAT1
MAML1
MAML2
MAN1C1
MANF
MAP1B
MAP1LC3B
MAP1S
MAP2K5
MAP3K5
MAP7D1
MAPK14
MAPKAPK5
MARK3
MATR3
MAU2
MBD3
MBTPS2
MCEE
MCF2L
MCM10
MCM5
MCM8
MCMBP
MDC1
MDGA1
MED1
MED12L
MED13
MED21
MED24
MED25
MED27
MED4
MED6
MEF2A
MEGF9
MEIS1
MEIS2
MESDC2
MET
METAP1D
METTL16
METTL23
METTL2A
METTL2B
METTL3
METTL4
METTL9
MFF
MFN1
MFSD10
MFSD11
MFSD6L
MFSD8
MGAT1
MGLL
MICAL3
MICALCL
MICU2
MIEF1
MIPOL1
MIR1181
MIR124-3
MIR1265
MIR129-2
MIR144
MIR146B
MIR199B
MIR203A
MIR26A1
MIR589
MIR769
MIR99B
MKL1
MKRN1
MLF1
MLLT11
MMADHC
MMP16
MMP25
MMS19
MNX1
MOB1A
MOCS3
MOK
MORC2-AS1
MORF4L1
MORF4L2
MORN4
MOSPD3
MPC2
MPDU1
MPHOSPH6
MPV17L
MRPL1
MRPL11
MRPL18
MRPL19
MRPL2
MRPL21
MRPL22
MRPL24
MRPL27
MRPL32
MRPL35
MRPL36
MRPL37
MRPL38
MRPL42
MRPL43
MRPL45
MRPL46
MRPL47
MRPL48
MRPL49
MRPL50
MRPL52
MRPL9
MRPS10
MRPS11
MRPS14
MRPS15
MRPS18A
MRPS18C
MRPS27
MRPS30
MRPS35
MRPS7
MRPS9
MRRF
MSANTD2
MSI2
MT1G
MTA2
MTCH2
MTF2
MTFP1
MTMR10
MTMR2
MTO1
MTURN
MTX1
MTX3
MUM1
MVB12B
MYBBP1A
MYD88
MYDGF
MYEF2
MYH16
MYL12B
MYL6
MYLK4
MYNN
MYO10
MYO19
MYO1C
MYO3A
MYO9B
N4BP1
N4BP2L2
N6AMT1
NAA15
NAA25
NAA38
NAA40
NAA60
NACA
NACAD
NACC2
NADK
NAGPA
NAPEPLD
NAPSB
NARF
NARFL
NARS
NBAS
NBPF15
NBR1
NCAPH2
NCF2
NCOR1
NCS1
NCSTN
NDC80
NDRG3
NDUFA2
NDUFA3
NDUFA6
NDUFA8
NDUFA9
NDUFAF6
NDUFAF7
NDUFB1
NDUFB5
NDUFB8
NDUFC1
NDUFS1
NDUFS2
NDUFS4
NDUFS6
NDUFS7
NDUFS8
NECAB1
NECAP1
NEDD9
NEGR1
NELFA
NETO1
NF1
NFATC2IP
NFE2
NFE2L1
NFIB
NFIC
NFIX
NFS1
NFYC
NGDN
NIF3L1
NKAIN2
NKAIN3
NKIRAS1
NKX6-3
NLGN1
NMRK2
NMT1
NMT2
NOB1
NOL11
NOL6
NONO
NOP2
NOTCH2
NOTCH2NL
NPC1L1
NPEPPS
NPM1
NPPB
NPTN
NR1D1
NR3C1
NRBF2
NRBP1
NRN1L
NSD1
NSF
NSFL1C
NSL1
NSMCE4A
NSRP1
NSUN2
NSUN5
NSUN7
NTN3
NTSR1
NTSR2
NUBPL
NUCB1
NUDCD3
NUDT21
NUDT4
NUF2
NUFIP2
NUP155
NUP160
NUP205
NUP35
NUP50
NUP88
NUS1
OARD1
OASL
OAZ1
ODF2
OGDH
OS9
OSBP2
OSBPL11
OSBPL9
OST4
OSTC
OTUB1
OXA1L
P3H3
P4HA2
PA2G4
PABPC4
PAFAH1B1
PAGR1
PAIP2B
PAK3
PAK4
PANK4
PARD3
PARP3
PARP6
PASK
PATZ1
PBXIP1
PC
PCBP1
PCBP4
PCDH1
PCED1A
PCED1B
PCF11
PCGF1
PCGF5
PCIF1
PCK1
PCNP
PCNT
PCNXL3
PDAP1
PDCD2L
PDDC1
PDE4D
PDE4DIP
PDGFB
PDHB
PDHX
PDS5A
PDS5B
PDSS1
PDSS2
PEF1
PEG3
PELI1
PELP1
PEPD
PEX1
PEX14
PEX19
PEX7
PFDN1
PFDN2
PFDN4
PFDN5
PGAM2
PGAP2
PGD
PGGT1B
PGPEP1
PGS1
PHB2
PHF12
PHF13
PHF14
PHF8
PHLDB1
PI4K2A
PIAS1
PIAS4
PICK1
PIDD1
PIGK
PIGO
PIGU
PIK3C3
PIKFYVE
PIP5K1A
PIP5KL1
PKM
PLA2G6
PLCB1
PLCB3
PLEC
PLEKHA5
PLEKHD1
PLOD3
PMS2
PMVK
PNISR
PNPLA6
PNPT1
PNRC1
POGLUT1
POGZ
POLD1
POLE4
POLH
POLL
POLR1C
POLR2A
POLR2D
POLR2J3
POLR2M
POLR3D
POLR3H
POLR3K
POP7
POTEF
POU2F1
PPCS
PPIL4
PPL
PPM1G
PPM1N
PPOX
PPP1CC
PPP1R12A
PPP1R12B
PPP1R13B
PPP1R14C
PPP1R15B
PPP1R21
PPP1R3G
PPP1R8
PPP2R4
PPP2R5D
PPP6C
PPP6R3
PPRC1
PPT1
PPWD1
PQLC2
PRCC
PRDM4
PRDX2
PRDX3
PREB
PRELID1
PREPL
PREX1
PRKAA1
PRKAG2
PRKAR1B
PRKCSH
PRMT1
PRMT5
PRMT7
PROC
PRORSD1P
PROSC
PRPF3
PRPF38A
PRPF38B
PRPF8
PRPH
PRPSAP1
PRR14
PRR7
PRRC2C
PRRG2
PRRT2
PRRX1
PRSS22
PRSS27
PRSS36
PRUNE2
PSCA
PSMA2
PSMB1
PSMB5
PSMB6
PSMB7
PSMC3
PSMC5
PSMC6
PSMD1
PSMD7
PSPC1
PSPN
PTBP1
PTCD3
PTGES2
PTK2
PTMA
PTPRD
PTPRM
PTRH1
PTRHD1
PUF60
PUM1
PUS3
PVRL1
QARS
QRICH1
QRSL1
QSOX2
QTRT1
RAB14
RAB1A
RAB1B
RAB28
RAB2B
RAB30
RAB3GAP1
RAB40C
RAB6A
RABGAP1L
RABL3
RABL6
RAC1
RACGAP1
RAD21
RAD51B
RAF1
RALA
RALGAPA2
RALY
RALYL
RANBP10
RANBP2
RANBP3
RAP1GAP
RAPGEF1
RBBP4
RBCK1
RBFOX2
RBL1
RBM12
RBM14
RBM15
RBM19
RBM25
RBM26
RBM27
RBM28
RBM39
RBM4
RBM8A
RBP7
RBX1
RCAN1
RCC1
RCC2
RDH13
RER1
REXO1
RFC4
RFX3
RHBDD3
RHOT1
RILPL1
RIMS2
RIMS4
RIOK3
RNASE11
RNASEH2A
RNASEH2B
RNASEH2C
RNF114
RNF115
RNF13
RNF135
RNF169
RNF181
RNF207
RNF220
RNF24
RNF26
RNF32
RNF39
RNF44
RNGTT
RNMTL1
ROM1
ROMO1
ROR1
RP9
RPA2
RPAP1
RPF1
RPF2
RPH3AL
RPL12
RPL13A
RPL18
RPL22
RPL22L1
RPL23A
RPL29
RPL3
RPL30
RPL34
RPL35A
RPL36
RPL4
RPL7L1
RPN1
RPP30
RPRD2
RPS11
RPS16
RPS26
RPS27
RPS28
RPS3
RPS6KB2
RPTOR
RPUSD3
RPUSD4
RRAS
RRM1
RRM2B
RRP15
RRP7A
RSPH4A
RSPRY1
RSRC2
RTKN
RTN4IP1
RUFY1
RUNDC1
S100A1
S100P
S1PR5
SAAL1
SAFB
SAFB2
SAMD8
SAP30BP
SAR1B
SARAF
SARNP
SARS2
SART1
SART3
SASS6
SAT2
SBF1
SBK2
SBNO2
SCARF1
SCARNA2
SCFD1
SCG2
SCNN1G
SCP2
SCRT1
SCYL1
SCYL3
SDAD1
SDC4
SDF4
SDHAP1
SDHB
SDHC
SEC14L2
SEC23B
SEC23IP
SEC24A
SEC24B
SEC62
SEMA3B
SEMA3C
SEMA3E
SEMA4A
SEMA5A
SENP3
SEPHS2
SERBP1
SERP1
SERPINB6
SERTAD1
SET
SETD1A
SETD3
SF3A1
SF3B2
SF3B3
SFI1
SFPQ
SFSWAP
SFXN1
SFXN3
SGK1
SGMS1
SGPP1
SGSM1
SH2D4A
SH3BP1
SH3BP5L
SH3RF3
SHE
SHKBP1
SHOC2
SHPK
SIN3A
SIN3B
SIRT1
SIRT2
SIT1
SIX6
SKA2
SKAP2
SKIV2L2
SLC12A4
SLC13A3
SLC16A10
SLC16A14
SLC17A5
SLC18A1
SLC22A23
SLC25A28
SLC25A38
SLC25A44
SLC27A2
SLC2A3
SLC2A7
SLC35C1
SLC38A1
SLC38A5
SLC39A14
SLC39A3
SLC39A9
SLC45A3
SLC48A1
SLC4A10
SLC4A1AP
SLC5A6
SLC5A8
SLC8A3
SLC9A8
SLIRP
SLMAP
SLMO1
SLU7
SLX4IP
SMARCA4
SMARCB1
SMARCD1
SMC1B
SMC4
SMCR8
SMDT1
SMEK1
SMEK2
SMG5
SMG8
SMIM11
SMNDC1
SMPD3
SMTN
SMYD3
SMYD5
SNAI2
SNAP23
SNAP25
SNAPC4
SNAR-B2
SND1
SNHG7
SNORA64
SNORA65
SNORD32A
SNORD35B
SNORD43
SNORD52
SNORD60
SNRNP200
SNRNP35
SNTA1
SNURF
SNW1
SNX1
SNX11
SNX13
SNX14
SNX17
SNX4
SNX5
SOCS1
SOCS2
SOCS5
SON
SORBS1
SORCS1
SP1
SP140
SP2
SP3
SPACA5
SPAG7
SPATA5
SPATS2
SPATS2L
SPC24
SPCS2
SPDYA
SPECC1
SPEF1
SPEN
SPG11
SPHK1
SPHK2
SPINK13
SPIRE1
SPNS1
SPRYD4
SPTA1
SPTBN5
SPTSSA
SREK1IP1
SRGAP1
SRGAP3
SRP68
SRRM2
SRRM3
SRRM4
SRSF1
SRSF2
SRSF3
SSBP4
SSC4D
SSC5D
SSR4
ST6GAL1
ST7L
STARD3
STBD1
STEAP2
STK11
STK40
STMN1
STUB1
STX12
STXBP3
SUCLG2
SUCO
SUGCT
SUMF1
SUMO2
SUPT5H
SUPT7L
SUPV3L1
SURF2
SUV39H1
SUV39H2
SUV420H1
SUV420H2
SYBU
SYF2
SYNGAP1
SYNGR1
SYNGR3
SYNGR4
SYNPO2
SYT1
SYTL3
SZRD1
TAB1
TAB3
TACR1
TAF13
TAF2
TAF3
TAF5
TAF6
TAF8
TANGO6
TAOK1
TAOK2
TAOK3
TARDBP
TBC1D14
TBC1D15
TBC1D22B
TBC1D23
TBC1D24
TBC1D5
TBCC
TBPL2
TBRG4
TCEB2
TCERG1
TCF3
TCF7L1
TCHP
TCP1
TCP11
TCP11L1
TCTN1
TCTN2
TERF2
TET1
TET2
TEX14
TEX261
TFAP2C
TFF3
TGDS
TGFB2
THAP1
THAP2
THAP3
THBS3
THEM4
THOC1
THOC2
THRA
THTPA
TIA1
TIAL1
TIMM13
TIMM17A
TIMM21
TIMM22
TIMM44
TIMM50
TJAP1
TLK2
TM2D1
TM9SF4
TMA7
TMBIM1
TMED10
TMED2
TMED9
TMEM101
TMEM11
TMEM114
TMEM126B
TMEM131
TMEM134
TMEM163
TMEM168
TMEM17
TMEM18
TMEM180
TMEM199
TMEM209
TMEM219
TMEM234
TMEM242
TMEM260
TMEM30A
TMEM39A
TMEM50B
TMEM59
TMEM62
TMEM63B
TMEM69
TMEM79
TMEM87B
TMEM99
TMPPE
TMPRSS12
TMPRSS4
TMPRSS7
TNFAIP8
TNFRSF14
TNFRSF19
TNKS
TNKS2
TNPO3
TNRC6B
TNS1
TOB2
TOM1L2
TOMM22
TOMM40L
TOMM6
TOPORS
TOR1A
TOR1AIP1
TP53
TPCN1
TPGS1
TPX2
TRA2A
TRA2B
TRABD2A
TRAF2
TRAK2
TRAP1
TRAPPC8
TRIM16L
TRIM4
TRIM65
TRIP11
TRIP4
TRIT1
TRMT1
TRMT12
TRPC4AP
TSC1
TSC2
TSC22D4
TSG101
TSPAN14
TSPAN3
TSPYL5
TSR1
TSSK6
TST
TSTA3
TSTD1
TSTD2
TTC17
TTC19
TTC27
TTC9
TTC9B
TTI1
TTLL11
TTYH2
TUBA1A
TUBA1B
TUBA4B
TUBB2A
TUBGCP4
TUBGCP6
TUSC2
TWF2
TXNDC15
TXNL4B
TXNRD2
TYRO3
TYW1
TYW3
TYW5
U2AF2
U2SURP
UBA1
UBA3
UBA52
UBAP1
UBB
UBE2G1
UBE2J2
UBE2L3
UBE2N
UBE2Q1
UBE2S
UBE2T
UBE2V2
UBE3A
UBE3B
UBE4B
UBIAD1
UBL7
UBN2
UBOX5
UBR3
UBR4
UBXN11
UCHL5
UFC1
UFD1L
UHRF1BP1L
UNC119B
UNC13D
UNC5D
UNG
UPF3B
UQCC1
UQCC2
UQCRB
UQCRC1
UQCRH
URM1
UROD
USE1
USF1
USF2
USP19
USP21
USP28
USP31
USP33
USP38
UTP20
UVSSA
VAMP2
VAV3
VCAN
VDR
VGLL4
VIL1
VMP1
VPS11
VPS16
VPS18
VPS33A
VPS53
VRTN
VSTM2L
[truncated: 145 more rows]

## Sheet: FOXM1 Target Gene
Gene
AIMP2
ANP32E
AP1G1
APOLD1
ARF6
ARHGAP11A
ARHGAP11B
ARHGAP24
ARL4A
ARL6IP1
ASPH
ASPM
ASXL1
ATAD2
ATF7IP
AURKA
AURKB
BRIP1
CACUL1
CALM2
CCDC85C
CCNA2
CCNB1
CCNB2
CCNF
CCNG2
CCP110
CDC20
CDC25B
CDCA2
CDCA8
CDK1
CDK19
CDKN2D
CDKN3
CENPA
CENPF
CEP192
CEP55
CHEK2
CIT
CKAP2
CKAP2L
CKAP5
CNIH4
CNOT1
COX8A
CPPED1
DCLRE1C
DEPDC1
DEPDC1B
DHRS7B
DLGAP5
DNAJB14
DTYMK
DYNLL1
DYNLL2
DZIP3
EIF2AK3
EIF3B
ELMO1
ELMSAN1
EMC9
ENC1
ESPL1
FAM110A
FAM111A
FAM53C
FAM64A
FAM83D
FBXL20
FBXO5
FKBP2
FNBP4
FZR1
GAS2L3
GBA
GPSM2
GRK6
GTF3C5
GTSE1-AS1
H1FX
H2AFX
H2AFZ
HIST1H2AG
HJURP
HMGB2
HMMR
HN1
HNRNPA2B1
HP1BP3
HSPA13
IER5L
INCENP
IP6K2
KBTBD2
KDM4A
KIF11
KIF14
KIF18A
KIF18B
KIF20A
KIF20B
KIF23
KIF24
KIF2C
KLHDC4
KNSTRN
KPNA2
KPNB1
KRAS
LBR
LGALS1
LGALS3
LMNB1
LMNB2
LSM5
MAD2L1BP
MAFB
METTL13
METTL15
MIR1260B
MIR301B
MIR3610
MIS18BP1
MKI67
MTMR14
MXD3
MZT1
NCAPD2
NCAPH
NEK2
NEURL1B
NFYB
NSUN5P2
NUCKS1
NUF2
NUP98
NUSAP1
ODF2
OSER1
PAK4
PARPBP
PCNT
PDK2
PGP
PHF19
PI4K2A
PIF1
PIM1
PIM3
PLA2G15
PLK1
POLG
PPM1B
PRC1
PTMS
PTTG1
QSER1
RAB8A
RACGAP1
RAP2A
RBBP5
RCCD1
REEP4
RFWD3
RHOQ
RND1
RNF26
RNFT2
RRM2
SCLT1
SEMA4B
SETD6
SF3B3
SFPQ
SGOL1
SKA2
SMAD3
SMAD6
SNHG10
SNIP1
SNORA76C
SNX5
SPAG5
SPC25
SPTB
SRSF5
SS18
STK11
STK17A
STK17B
SUN2
TACO1
TAF5
TAF8
TATDN1
TMBIM6
TMEM129
TMPO
TNFAIP8L1
TNK2
TOP2A
TPX2
TRIM59
TROAP
TTF2
TTK
TUBA1C
TUBB4B
TXNIP
UBALD2
UBE2C
UBE2S
UBXN11
UCP2
USP13
USP19
WARS2
WBP1
WDPCP
WEE1
ZADH2
ZBTB5
ZMYND8
ZNF165
ZNF785

## Sheet: TRIM28 Target Gene
Gene
2021-03-02
AAAS
AAGAB
AARS
AASS
AATF
ABCA17P
ABCA3
ABCA4
ABCB8
ABCC1
ABCC4
ABCC5
ABCD2
ABCD3
ABCE1
ABCG1
ABCG2
ABI1
ABLIM2
ABTB2
ACAD10
ACADM
ACAP3
ACBD6
ACE
ACER2
ACER3
ACKR3
ACO1
ACO2
ACOT2
ACSL3
ACTG1
ACTL8
ACTN4
ACTR1B
ADAM22
ADAM9
ADAMTSL4
ADAR
ADAT2
ADC
ADCK1
ADCK4
ADD3
ADGRB2
ADGRE5
ADHFE1
ADIPOR1
ADO
ADORA2B
ADPGK
ADPRHL2
ADRA2C
ADRB1
ADRM1
AFG3L1P
AFG3L2
AGBL3
AGBL5
AGGF1
AGO1
AGO3
AGPAT5
AHCTF1
AHCYL2
AHI1
AJUBA
AK3
AKAP1
AKAP10
AKAP12
AKAP2
AKAP9
AKR1B1
AKR7A2
ALAD
ALDH7A1
ALG5
ALG9
ALKBH2
ALKBH4
ALKBH5
ALOXE3
ALS2
AMBRA1
AMD1
AMER2
AMIGO2
AMMECR1L
ANAPC10
ANAPC13
ANAPC7
ANKIB1
ANKRD1
ANKRD13A
ANKRD13C
ANKRD37
ANKRD40
ANKRD46
ANKRD54
ANKS1A
ANLN
ANO6
ANP32B
ANTXR1
ANTXR2
ANXA1
ANXA2
AP1G1
AP1S2
AP1S3
AP2A2
AP2B1
AP3B1
AP3B2
AP4M1
AP5M1
AP5S1
APBB2
API5
APLNR
APLP2
APOA1BP
APOM
APP
APPBP2
APRT
ARF4
ARF6
ARFGAP2
ARFGAP3
ARGLU1
ARHGAP26
ARHGAP31
ARHGDIA
ARHGEF12
ARID5B
ARIH1
ARIH2
ARL10
ARL13B
ARL2
ARL2BP
ARL4A
ARL4C
ARL5A
ARMC1
ARMC6
ARMC8
ARPC5
ARPC5L
ARRB1
ARRB2
ARRDC2
ARSB
ASAH1
ASAP1
ASF1A
ASH2L
ASNS
ASPH
ASPSCR1
ASS1
ASXL1
ATAD2
ATAD2B
ATAD3A
ATE1
ATF4
ATF7IP
ATG10
ATG16L1
ATG3
ATG4B
ATG4C
ATN1
ATP13A1
ATP1A1
ATP1B1
ATP2A3
ATP5C1
ATP5J
ATP5O
ATP6V0B
ATP6V1B2
ATP6V1F
ATPAF1
ATPAF2
ATPIF1
ATXN7L1
AURKA
AURKAIP1
AVPR1A
AZI2
AZIN1
B3GALNT2
B4GALNT1
B4GALNT3
B4GALT1
B4GALT3
BACH2
BAG2
BAMBI
BANP
BARX2
BBS4
BCAR1
BCAR3
BCAT1
BCL11A
BCL2L2
BCL6
BCL9
BCLAF1
BCOR
BICD1
BICD2
BIRC6
BLCAP
BLM
BLOC1S3
BMF
BMP2
BMPER
BMPR1A
BMPR2
BMS1
BNIP3
BOK
BOLA1
BPHL
BPNT1
BRAF
BRAP
BRAT1
BRCA2
BRD1
BRE
BRINP2
BSG
BTAF1
BTBD1
BTD
BTG1
BUB3
C11ORF1
C11ORF54
C11ORF58
C11ORF80
C12ORF57
C12ORF66
C14ORF166
C15ORF39
C16ORF13
C16ORF46
C16ORF70
C16ORF89
C17ORF49
C17ORF70
C17ORF80
C18ORF32
C19ORF53
C19ORF60
C1ORF106
C1ORF115
C1ORF131
C1ORF174
C1ORF27
C1ORF50
C1QA
C1QBP
C20ORF194
C20ORF24
C20ORF96
C2ORF88
C3ORF58
C3ORF67
C3ORF70
C4ORF19
C5ORF24
C5ORF30
C6ORF203
C7ORF49
C8ORF34
C8ORF37
C8ORF4
C9ORF41
C9ORF43
C9ORF91
CA11
CA14
CAB39
CAB39L
CABLES1
CACHD1
CACUL1
CACYBP
CALCB
CALM1
CALR
CAMK1D
CAMK2D
CAMKV
CAP1
CAP2
CAPN2
CAPN7
CAPNS1
CASKIN2
CASP9
CBFB
CBR3
CBX1
CBX2
CBX3
CBX4
CC2D1B
CCDC101
CCDC103
CCDC106
CCDC12
CCDC124
CCDC126
CCDC177
CCDC40
CCDC50
CCDC58
CCDC6
CCDC69
CCDC71L
CCDC85B
CCDC88A
CCKBR
CCNA2
CCNC
CCND2
CCNE2
CCNG2
CCNJ
CCNL2
CCPG1
CCSER2
CCT4
CD164
CD47
CD55
CD68
CDC16
CDC25A
CDC37L1
CDC42SE1
CDC5L
CDC7
CDC73
CDCA7
CDH24
CDK11B
CDK19
CDK5
CDK5RAP1
CDK6
CDKL2
CDKN1A
CDKN1B
CDKN2A
CDKN2AIP
CDKN2AIPNL
CDKN2B
CDKN2C
CDNF
CDS2
CDX2
CEBPB
CEBPZ
CECR6
CELF1
CELSR2
CELSR3
CENPM
CENPN
CENPP
CEP120
CEP135
CEP68
CEP78
CEP95
CERS5
CERS6
CES3
CETN3
CFDP1
CFL1
CFL2
CFLAR
CGA
CHAF1A
CHCHD1
CHCHD4
CHCHD5
CHCHD6
CHD1L
CHD2
CHD7
CHD9
CHML
CHMP1A
CHPF
CHRAC1
CHST11
CHST2
CHST7
CIPC
CISD1
CITED2
CIZ1
CKAP2
CKAP5
CKB
CKLF
CLCC1
CLCN2
CLCN3
CLIC4
CLK1
CLNS1A
CLOCK
CLSTN3
CMC1
CMC2
CMPK1
CMTM3
CMTM4
CMTR1
CNBP
CNEP1R1
CNIH3
CNIH4
CNKSR3
CNN3
CNNM2
CNNM3
CNOT11
CNOT2
CNOT3
CNOT6
CNOT7
CNOT8
CNR1
COBLL1
COG2
COG5
COIL
COL27A1
COL4A3BP
COLGALT1
COLGALT2
COMMD3
COMMD7
COMTD1
COPB1
COPS5
COPS6
COPS8
COQ10B
COQ5
COX11
COX20
COX4I1
COX5A
COX6A1
CPE
CPEB3
CPNE1
CPNE2
CPSF2
CPSF4
CRACR2B
CRADD
CRAT
CREB1
CREB3
CREG2
CRLF3
CROT
CRTAP
CRTC1
CRY1
CSAD
CSE1L
CSF1
CSF2RA
CSNK1A1
CSNK2A1
CSRP2
CSRP3
CSTF1
CTCF
CTDP1
CTGF
CTNNA1
CTNNAL1
CTNNB1
CTXN1
CUL2
CUL3
CUL4A
CUL4B
CUL5
CUX1
CXCL12
CYB5B
CYLD
CYP1B1
CYP20A1
CYP2R1
CYR61
DAB1
DACT2
DAD1
DAP
DAP3
DAPK3
DBF4
DBR1
DCAF10
DCAF13
DCAKD
DCK
DCLRE1A
DCP1A
DCP1B
DCT
DCTD
DCUN1D2
DCUN1D5
DDAH1
DDX10
DDX18
DDX19A
DDX19B
DDX20
DDX28
DDX31
DDX5
DDX50
DDX59
DDX6
DEAF1
DEDD
DEF8
DEK
DENND5B
DENR
DEPDC1B
DEPTOR
DESI2
DFFB
DFNA5
DGAT1
DGKD
DHCR24
DHPS
DHRS3
DHX15
DHX32
DHX9
DIAPH3
DIDO1
DIS3
DIS3L
DIS3L2
DISC1
DKK2
DKKL1
DLD
DLG1
DLL1
DLST
DLX1
DLX2
DLX5
DLX6
DMAP1
DMRT1
DNA2
DNAAF2
DNAJA1
DNAJB1
DNAJB4
DNAJB6
DNAJC1
DNAJC11
DNAJC16
DNAJC2
DNAJC21
DNAJC4
DNAJC6
DNALI1
DNASE2
DNER
DNLZ
DNM1
DNM1L
DNMT3B
DOCK4
DOCK5
DOCK7
DOLK
DONSON
DPAGT1
DPF3
DPH1
DPM1
DPYSL2
DRD2
DSCAM
DSCR8
DSE
DSG2
DSTN
DSTYK
DTX3
DTX4
DTYMK
DUS2
DUS4L
DUSP1
DUSP12
DUSP2
DUSP4
DUSP6
DYM
DYNC1I1
DYNC1LI2
DYNC2H1
DYNLL1
DYRK2
DYRK3
E2F2
E2F4
E2F6
E2F8
EAF2
EAPP
EARS2
EBF1
EBPL
ECD
ECE2
EDEM1
EDEM3
EEA1
EED
EEF2
EEFSEC
EFCAB2
EFHD1
EFNA5
EFNB1
EFNB2
EFR3A
EFTUD2
EGLN3
EGR1
EHD3
EHD4
EID1
EIF2A
EIF2B5
EIF3A
EIF3B
EIF3F
EIF4A1
EIF4A2
EIF4E2
EIF4E3
EIF4EBP1
EIF4G2
EIF4G3
EIF4H
EIF5A
ELAVL2
ELF1
ELK3
ELL3
ELMOD2
ELOVL4
ELOVL6
EMC8
EMP1
EMX2
ENDOG
ENOPH1
ENOX1
ENPP4
EOGT
EOMES
EPB41L4A
EPB41L5
EPC1
EPC2
EPHA4
EPHA7
EPHB4
EPM2AIP1
EPN1
EPRS
EPS8
ERAL1
ERBB2
ERBB3
ERBB4
ERCC6
ERCC6L2
ERGIC2
ERI1
ERLIN1
ERO1L
ERO1LB
ESM1
ESYT2
ETF1
ETFB
ETS2
ETV6
EVC
EVC2
EXOC1
EXOC2
EXOC5
EXOC8
EXOSC3
EXOSC6
EXOSC8
EYA1
EZH2
EZR
FAAH
FAF1
FAF2
FAIM
FAM104A
FAM122A
FAM13B
FAM149B1
FAM162A
FAM171B
FAM174A
FAM181B
FAM185A
FAM207A
FAM212B
FAM219B
FAM3C
FAM46A
FAM53A
FAM60A
FAM63B
FAM73A
FAM78A
FAM92A1
FANCF
FARS2
FARSA
FASN
FBLN1
FBN2
FBXL15
FBXL4
FBXL7
FBXL8
FBXO21
FBXO22
FBXO27
FBXO30
FBXO34
FBXO42
FBXO46
FBXO7
FBXO9
FBXW11
FBXW2
FDX1
FEM1B
FER
FGD3
FGD6
FGF18
FGF2
FGF20
FGF8
FGF9
FGFBP3
FGFR1
FHIT
FIBP
FICD
FITM2
FJX1
FKBP10
FKBP4
FLII
FLNB
FLRT2
FLT3
FMN2
FN3K
FNDC1
FNDC3A
FNDC3B
FOLH1
FOXA1
FOXB1
FOXD1
FOXD2
FOXF1
FOXJ2
FOXJ3
FOXM1
FOXN3
FOXO3
FOXP1
FOXQ1
FRAS1
FRAT2
FRG1
FRZB
FSD2
FSTL1
FSTL4
FUBP1
FURIN
FUT11
FUT8
FZD1
FZD3
FZD4
FZD5
FZD8
G0S2
GAB1
GAB2
GABARAPL2
GABPA
GABPB1
GALC
GAPVD1
GAR1
GARS
GAS1
GAS2L1
GATA6
GATC
GATS
GCFC2
GCLC
GDF2
GDNF
GFER
GFRA1
GGA1
GGA2
GGA3
GGH
GHR
GID4
GIGYF2
GINS3
GJC1
GLI3
GLIPR2
GLRX
GLRX2
GLUL
GMCL1
GMEB2
GMNN
GNA13
GNAI1
GNAI2
GNAL
GNAQ
GNB1L
GNPAT
GNPNAT1
GOLGA1
GOLGA5
GOLGA7
GOLM1
GOLPH3
GOLT1B
GORASP2
GOT2
GP1BB
GPATCH1
GPATCH3
GPC6
GPD1L
GPR1
GPR180
GPR39
GPR85
GPRC5C
GPT2
GRAMD1A
GREM2
GRHL3
GRIK3
GSC
GSG2
GSK3B
GSPT1
GSR
GSTCD
GSTZ1
GTF2A2
GTF2F2
GTF2IRD2
GTF3A
GTF3C4
GTPBP1
GULP1
H1F0
H2AFX
H2AFY2
HACD3
HACE1
HAPLN1
HAUS4
HDAC2
HDGFRP3
HEATR3
HERPUD2
HEXA
HEY1
HHAT
HHEX
HIAT1
HIF1AN
HIGD1A
HIGD2A
HINT1
HINT2
HIPK3
HIRA
HIST1H3B
HIST2H2BE
HIST2H4A
HIVEP1
HKR1
HLX
HMCN1
HMG20A
HMGA1
HMGA2
HMGB1
HMGCR
HMGN1
HMGN2
HMGN3
HMGXB3
HMOX1
HNRNPA2B1
HNRNPAB
HNRNPDL
HNRNPH1
HNRNPK
HNRNPLL
HOMER1
HOMEZ
HOOK1
HOOK3
HOXA1
HOXA11
HOXB9
HOXD1
HOXD8
HP1BP3
HPCA
HPS3
HPS6
HRK
HS3ST3A1
HS3ST3B1
HS6ST3
HSP90AA1
HSPA14
HSPA1L
HSPA4
HSPA4L
HSPA9
HSPB1
HSPB8
HSPD1
HSPE1
HUNK
HYAL2
HYAL3
HYPK
IARS2
IBA57
ICK
ID1
ID2
ID4
IDH1
IDH2
IER2
IER5
IFITM1
IFRD1
IFRD2
IFT80
IFT88
IGBP1
IGF1R
IGF2R
IGFBP3
IGFBP5
IGFBP7
IGSF21
IKZF3
IL12B
IL1RAP
IL6
ILKAP
IMP3
IMPA2
IMPACT
IMPAD1
IMPDH1
INA
ING1
ING5
INHA
INHBE
INO80
INSIG1
INSIG2
INTS12
INTS5
INTS8
IP6K1
IPMK
IPO8
IPO9
IPP
IQCE
IQCG
IQSEC3
IRAK1BP1
IRF2BPL
IRX3
IRX5
ISCA1
ISL1
ISL2
ISLR2
ISPD
IST1
ITFG1
ITGA3
ITGAV
ITGB1
ITPKC
ITPR3
IZUMO4
JAG1
JAGN1
JAK1
JMY
JOSD1
JOSD2
JUN
JUNB
JUND
JUP
KANSL2
KARS
KAT5
KAT6A
KATNAL1
KBTBD7
KCNA1
KCNC3
KCNC4
KCNH1
KCNH4
KCNK1
KCNMB4
KCTD12
KCTD13
KCTD15
KCTD18
KCTD21
KCTD5
KCTD8
KDELC2
KDM1A
KDM3A
KDM4C
KDSR
KEAP1
KHDRBS1
KIAA0319L
KIAA0895L
KIAA0922
KIAA1324L
KIAA1328
KIAA1804
KIAA2013
KIF13A
KIF1BP
KIF23
KIF25
KIF2A
KIF2C
KIFC3
KIN
KIT
KLF1
KLF10
KLF12
KLF15
KLF16
KLF5
KLF6
KLF9
KLHDC1
KLHL12
KLHL21
KLHL28
KMO
KNOP1
KPNA1
KPNA4
KRIT1
KRR1
KRT19
KSR1
LARGE
LARP6
LASP1
LBR
LDHB
LEF1
LETM1
LETMD1
LHFP
LHX4
LIG3
LIG4
LIN7C
LIPT2
LMLN
LMO1
LMO2
LNPEP
LOC646862
LONP1
LONRF3
LPAR3
LPCAT1
LPCAT4
LRCH4
LRFN2
LRIG1
LRIG2
LRP10
LRP2
LRP4
LRPPRC
LRRC40
LRRC41
LRRC58
LRRC59
LRRC8A
LRRC8D
LRRCC1
LRRK2
LRWD1
LSAMP
LSM11
LSM14A
LSM14B
LSM6
LUC7L3
LURAP1L
LYN
LYPD1
LYPLA1
LYRM2
LYRM4
LYRM7
MACROD1
MACROD2
MADD
MAF1
MAFG
MAGI1
MAGI3
MAGOH
MAN1A2
MAN2A1
MANF
MAP1LC3B
MAP2K3
MAP2K5
MAP3K11
MAP3K14
MAP3K4
MAP3K5
MAP3K6
MAP4
MAP7
MAPK1
MAPK6
MAPRE2
MAPRE3
MAPT
MARS
MASTL
MAT2A
MATR3
MAU2
MB21D2
MBD2
MBOAT7
MBTPS1
MCCC2
MCL1
MCOLN1
MCTP1
MCTS2P
MDFIC
MDH2
MDM4
MDN1
ME2
MECOM
MECR
MED14
MED25
MEF2A
MEGF9
MEIS1
MEN1
MEOX2
MERTK
MESP2
METTL21A
METTL2B
METTL5
MEX3C
MFAP1
MFGE8
MFN1
MFSD11
MFSD5
MGAT1
MGAT2
MGEA5
MIB2
MICU2
MIEF2
MIPEP
MKLN1
MKNK1
MKRN1
MKRN3
MLC1
MLF2
MLH1
MLLT10
MLLT11
MLXIP
MMAA
MMADHC
MME
MMP15
MMP25
MMS19
MOB1B
MOB4
MOGS
MOV10L1
MPC1
MPHOSPH8
MPLKIP
MPND
MRFAP1
MRM1
MROH8
MRPL18
MRPL3
MRPL33
MRPL34
MRPL40
MRPL48
MRPL49
MRPL57
MRPL9
MRPS24
MRPS25
MRPS26
MRPS30
MRPS31
MRPS7
MRS2
MSC
MSH2
MSH4
MSH6
MSI1
MSL1
MSMO1
MSRA
MSX1
MSX2
MTA2
MTCH2
MTDH
MTF2
MTFR1
MTFR1L
MTMR2
MTMR7
MTMR9
MTO1
MTPAP
MTPN
MTUS1
MTX1
MTX2
MUS81
MXD3
MYL12A
MYO10
MYO3A
MYOM2
MYPOP
NAA15
NAA16
NABP2
NADK
NAE1
NAMPT
NAP1L1
NARS2
NAT6
NBN
NBR2
NCAPD3
NCBP1
NCBP2
NCDN
NCKAP5L
NCL
NCOA5
NCOR1
NDEL1
NDFIP2
NDRG1
NDRG2
NDUFA13
NDUFA6
NDUFAB1
NDUFC1
NDUFV2
NEBL
NEFL
NEK2
NEK7
NELFA
NEO1
NES
NEURL1
NEUROG1
NEUROG2
NEUROG3
NFAT5
NFE2
NFIA
NFYC
NGFRAP1
NHEJ1
NHLRC2
NHLRC3
NHP2L1
NINJ2
NIPAL2
NIPBL
NLRX1
NMI
NMT2
NNMT
NOB1
NOD1
NOG
NOL3
NOL7
NOP16
NOS3
NPDC1
NPHP3
NPM3
NPR3
NPTX1
NQO1
NR0B2
NR1D1
NR1D2
NR4A2
NR4A3
NRARP
NRF1
NRP2
NSFL1C
NT5C3A
NTAN1
NTRK2
NTS
NUAK1
NUDC
NUDT19
NUDT22
NUDT3
NUDT9
NUMA1
NUP188
NUP43
NUP88
NUP98
NUPL2
NUTF2
NVL
NXF1
NXPH4
OAT
OAZ3
ODC1
OLA1
OLIG2
OPA1
OPA3
OPN3
OPRD1
OPTN
ORAI1
ORC2
ORMDL1
OSBPL8
OSER1
OSGEPL1
OSR2
OSTF1
OSTM1
OTX1
OXCT1
P2RY1
P3H1
P3H2
P3H4
P4HTM
PABPC4
PABPN1
PACS1
PANK1
PANK4
PANX1
PAPD4
PAPSS1
PAQR8
PARD3
PARG
PARK7
PARN
PARP1
PARP4
PARVA
PATZ1
PAWR
PAX2
PAX6
PBK
PCDH7
PCDHGB1
PCED1A
PCGF2
PCID2
PCLO
PCMT1
PCNP
PCNXL3
PCYT1A
PDCD2
PDCD6IP
PDE1B
PDE1C
PDE3A
PDE4DIP
PDE5A
PDGFC
PDIA3
PDIA4
PDIA6
PDIK1L
PDK1
PDK2
PDLIM5
PDPR
PDSS2
PDXDC1
PDXK
PDZD8
PEAK1
PEAR1
PENK
PER2
PERP
PEX11B
PEX12
PEX16
PEX2
PEX3
PEX5
PFDN4
PFN1
PFN2
PGLS
PHACTR4
PHAX
PHF14
PHF5A
PHGDH
PHKB
PHLDA3
PHOSPHO2
PHPT1
PHTF1
PI4K2B
PI4KA
PIAS1
PIAS4
PIGL
PIGP
PIGW
PIKFYVE
PIM1
PIM2
PINK1
PIP4K2C
PITHD1
PITPNB
PITX1
PKM
PKP2
PKP4
PLAGL1
PLAT
PLCB1
PLEKHA1
PLEKHB1
PLEKHH2
PLEKHJ1
PLK3
PLOD1
PLOD2
PM20D2
PMAIP1
PMPCB
PMS1
PNMA2
PNOC
PNRC1
PODXL
POGLUT1
POLG
POLG2
POLH
POLK
POLM
POLR1E
POLR2B
POLR2C
POLR2H
POLR3E
POMT1
POMT2
POPDC3
POU2F1
PPA1
PPA2
PPAP2A
PPAP2B
PPHLN1
PPIA
PPIB
PPIC
PPIF
PPIH
PPM1G
PPM1L
PPP1R12A
PPP1R14A
PPP1R2
PPP1R35
PPP1R8
PPP1R9B
PPP2CA
PPP2R1A
PPP2R4
PPP2R5E
PPP3CA
PPP3CC
PPP6C
PPP6R3
PQLC2
PRDM1
PRDM4
PRDM5
PRDX2
PREP
PREPL
PREX1
PRKAA2
PRKAB2
PRKAG2
PRKAR2A
PRKCE
PRLR
PRMT7
PROS1
PROSER1
PROX1
PRPF38B
PRPF4B
PRPF6
PRPH
PRR14
PRRC1
PRRG4
PRSS16
PRSS23
PSD
PSMB3
PSMC2
PSMD11
PSMD7
PSPC1
PSTPIP2
PTBP1
PTBP3
PTCD1
PTDSS2
PTGES2
PTGES3
PTGFRN
PTMA
PTMS
PTP4A1
PTPN18
PTPRG
PTPRU
PTRH2
PUF60
PUM1
PURB
PVRL1
QKI
RAB10
RAB17
RAB18
RAB1A
RAB20
RAB21
RAB23
RAB29
RAB2A
RAB30
RAB33B
RAB6A
RAB7A
RAB8A
RABEPK
RABGAP1L
RABGGTB
RABIF
RABL6
RAC1
RAD1
RAD18
RAD23A
RAD23B
RAD9B
RADIL
RAE1
RAF1
RALA
RAMP1
RANBP1
RANBP17
RANBP2
RAP1A
RAP2A
RAP2B
RASA2
RASA3
RASAL2
RASEF
RASGEF1B
RASL10A
RB1CC1
RBBP5
RBKS
RBL1
RBM12
RBM12B
RBM17
RBM22
RBM34
RBM38
RBM39
RBM6
RBMS1
RBMX
RCAN1
RCC1
RCE1
RCN1
RCN2
RDH10
RDX
RECQL
RELA
REPIN1
RER1
REV3L
REXO2
RFC1
RFFL
RFK
RFPL2
RFWD3
RGAG4
RGL1
RGS7
RHBDL1
RHEB
RHEBL1
RHOB
RHOT1
RHOU
RIF1
RIMS2
RIOK2
RIPK2
RMDN3
RMI1
RNASE4
RNASEH2A
RNASEH2C
RND2
RND3
RNF10
RNF11
RNF115
RNF122
RNF13
RNF139
RNF149
RNF151
RNF167
RNF170
RNF182
RNF207
RNF219
RNF220
RNF4
RNF44
RNF6
RNF7
RNH1
RNPEP
ROCK1
ROCK2
ROPN1L
ROR1
ROR2
RPAIN
RPE
RPIA
RPL10A
RPL13
RPL14
RPL17
RPL18A
RPL22
RPL27A
RPL28
RPL32
RPL35
RPL36AL
RPL37
RPL7
RPN2
RPP14
RPRD1B
RPS10
RPS15A
RPS17
RPS19
RPS2
RPS20
RPS24
RPS4X
RPS6
RPS6KA1
RPS8
RPTOR
RQCD1
RREB1
RRM1
RRP1B
RRS1
RSBN1
RSF1
RSPH3
RSRC1
RTCB
RTN1
RTN4RL1
RUFY1
RUNX1
RUSC2
RWDD1
RWDD3
S100A13
S100Z
S1PR1
S1PR5
SAC3D1
SACM1L
SAMD10
SAP18
SAP30
SAR1B
SARAF
SARS2
SASH1
SCAND1
SCARB2
SCARF2
SCCPDH
SCLY
SCT
SCYL3
SDF2
SDK2
SEC14L1
SEC24A
SEC24C
SECISBP2
SEH1L
SEMA5B
SENP6
SENP8
SERBP1
SERF2
SERP1
SERPINE1
SERPINF2
SERTAD1
SERTAD3
SESN3
SETD5
SETDB1
SETX
SF1
SF3A2
SFRP5
SFSWAP
SGK1
SGOL1
SGOL2
SGPP2
SGSM2
SGSM3
SH2B3
SH3GL1
SH3GL2
SH3RF3
SHARPIN
SHC3
SHISA2
SIAH1
SIK2
SIM1
SIRT4
SIRT7
SIVA1
SIX1
SIX5
SKA3
SKIDA1
SKP2
SLC10A4
SLC10A7
SLC11A2
SLC12A4
SLC15A4
SLC16A1
SLC16A14
SLC19A2
SLC20A1
SLC22A3
SLC25A1
SLC25A10
SLC25A11
SLC25A12
SLC25A16
SLC25A28
SLC25A32
SLC25A36
SLC25A40
SLC25A42
SLC25A5
SLC25A51
SLC27A3
SLC27A4
SLC2A1
SLC30A1
SLC30A5
SLC35A1
SLC35A3
SLC35A5
SLC35B4
SLC35E3
SLC35F1
SLC35F5
SLC39A10
SLC39A13
SLC39A3
SLC3A2
SLC45A3
SLC4A2
SLC6A6
SLC7A5
SLC7A6
SLC7A6OS
SLC9A2
SLC9A3R2
SLC9A8
SLMO1
SLN
SLTM
SMAD1
SMAD3
SMAD6
SMAP1
SMARCB1
SMARCD1
SMARCD3
SMARCE1
SMC3
SMC4
SMC5
SMEK1
SMG1
SMIM15
SMIM3
SMOC1
SMYD5
SNAI1
SNAI3
SNAP23
SNAP29
SND1
SNED1
SNIP1
SNPH
SNRNP35
SNRPA1
SNRPD1
SNRPE
SNTA1
SNW1
SNX13
SNX18
SNX19
SNX21
SNX30
SNX8
SNX9
SOCS2
SOCS4
SOD1
[truncated: 490 more rows]

## Sheet: SMAD4 Target Gene
Gene
2021-03-04
2021-03-05
2021-03-11
2021-09-05
2021-09-10
2021-09-15
A1CF
A4GNT
AAA1
AADACL4
AADAT
AAED1
AASDH
AATF
ABCA10
ABCA12
ABCA4
ABCA5
ABCB1
ABCB11
ABCB4
ABCB5
ABCC1
ABCC12
ABCC3
ABCD4
ABCG1
ABHD12
ABHD17B
ABHD17C
ABHD2
ABHD4
ABI3BP
ABLIM1
ABLIM2
ABR
ABRA
ABTB2
ACAA2
ACBD6
ACCSL
ACER3
ACHE
ACMSD
ACOT8
ACOT9
ACOX1
ACOX3
ACOXL
ACP5
ACP6
ACPP
ACSM4
ACSS1
ACSS3
ACTA2
ACTB
ACTC1
ACTG2
ACTL8
ACTN1
ACTR3
ACTR3B
ACTR6
ACVR2A
ADAM10
ADAM11
ADAM19
ADAM22
ADAM23
ADAM28
ADAM29
ADAM7
ADAMDEC1
ADAMTS16
ADAMTS17
ADAMTS18
ADAMTS2
ADAMTS3
ADAMTS6
ADAMTS8
ADAMTS9
ADAMTSL1
ADAP2
ADAR
ADARB2-AS1
ADAT1
ADCK4
ADCY2
ADCY9
ADD1
ADGRA3
ADGRB3
ADGRD1
ADGRE3
ADGRF2
ADGRF4
ADGRF5
ADGRG6
ADGRG7
ADGRL3
ADGRV1
ADK
ADM
ADORA1
ADORA2B
ADORA3
ADRA2C
ADRB2
ADTRP
AFAP1
AFAP1L2
AFF1
AFF3
AFF4
AFG3L1P
AGBL4
AGER
AGFG2
AGK
AGL
AGMAT
AGPAT1
AGPAT3
AGPAT9
AGPS
AGR2
AGR3
AGTR1
AGTR2
AHCYL1
AHCYL2
AHI1
AHNAK
AHSA2
AIFM1
AIG1
AIM2
AK3
AK5
AK8
AK9
AKAP11
AKAP13
AKAP2
AKAP6
AKIP1
AKIRIN1
AKIRIN2
AKNAD1
AKR1C2
AKR1C4
AKR1C8P
AKR1E2
AKT2
ALCAM
ALDH1B1
ALDH4A1
ALG14
ALG2
ALK
ALMS1
ALOX5AP
ALPK2
ALS2
AMBN
AMER3
AMIGO2
AMMECR1
AMN1
AMOT
AMOTL1
AMOTL2
AMPD3
AMPH
ANGPT1
ANGPT2
ANGPTL1
ANGPTL3
ANK2
ANK3
ANKDD1A
ANKFN1
ANKFY1
ANKHD1
ANKIB1
ANKRD10
ANKRD11
ANKRD42
ANKRD44
ANKRD45
ANKRD50
ANKRD55
ANKRD6
ANKS1B
ANLN
ANO10
ANO4
ANO6
ANOS1
ANXA1
ANXA13
ANXA2
ANXA4
ANXA5
ANXA7
ANXA8L1
AOAH
AP1M1
AP1S2
AP1S3
AP2B1
AP2M1
AP3M2
APBA2
APBB2
APC
APCDD1L
APIP
APLP2
APOA4
APOB
APOH
APOLD1
APTX
AQP2
AQP4
AQP4-AS1
AQP9
AR
ARAP2
AREG
AREL1
ARF1
ARGLU1
ARHGAP10
ARHGAP15
ARHGAP18
ARHGAP20
ARHGAP21
ARHGAP22
ARHGAP24
ARHGAP26
ARHGAP28
ARHGAP31
ARHGAP32
ARHGAP40
ARHGAP6
ARHGEF10
ARHGEF10L
ARHGEF11
ARHGEF2
ARHGEF26
ARHGEF3
ARHGEF4
ARID1B
ARID2
ARID3B
ARID5B
ARL1
ARL14
ARL14EP
ARL15
ARL3
ARL4A
ARL4C
ARL4D
ARL6IP4
ARL6IP6
ARL9
ARMC2
ARMC3
ARMC4
ARMC7
ARNT2
ARNTL2
ARPP21
ARRDC1
ARRDC3
ARSB
ARSG
ARTN
ARX
ASAP1
ASAP2
ASB4
ASCC3
ASH1L
ASH2L
ASIC2
ASPHD2
ASTN1
ASTN2
ASXL3
ATAD2
ATAD2B
ATE1
ATF3
ATF6
ATF7IP
ATG10
ATG4C
ATG5
ATG7
ATIC
ATL2
ATP10A
ATP10B
ATP11A
ATP12A
ATP13A3
ATP13A5
ATP1A1
ATP1B1
ATP1B3
ATP2A2
ATP2B1
ATP2B2
ATP2B4
ATP5G2
ATP5J
ATP6AP1L
ATP6V0D2
ATP6V1B2
ATP6V1D
ATP6V1E1
ATP8A2
ATP8B1
ATP9A
ATPAF1
ATPAF2
ATRNL1
ATXN1
ATXN10
ATXN3L
ATXN7L1
ATXN7L2
ATXN8OS
AUH
AUTS2
AVEN
AVL9
AVPR1A
AXDND1
AXIN2
AZIN1
B3GALT2
B3GALTL
B3GNT5
B4GALNT3
B4GALT4
B9D1
BAALC
BACE1
BACH2
BAG3
BAGE
BAHCC1
BAHD1
BAIAP2L1
BAK1
BAMBI
BANP
BARHL1
BARX2
BASP1
BATF3
BBC3
BBS12
BBS5
BBS9
BCAM
BCAR3
BCAS1
BCAS2
BCAS3
BCAT1
BCKDHB
BCL11A
BCL11B
BCL2L1
BCL2L10
BCL9
BCL9L
BCR
BDH1
BDNF
BEAN1
BEND2
BEND3
BEND7
BET1
BEX1
BHLHE22
BHLHE23
BHLHE40
BHMT2
BICC1
BICD1
BIN2
BIN3
BLCAP
BLK
BLMH
BLOC1S2
BLOC1S6
BMP10
BMP2
BMP2K
BMP4
BMP5
BMP6
BMP7
BMPER
BMPR1B
BMPR2
BNC1
BNC2
BNIP2
BOC
BOD1L2
BPESC1
BRCA1
BRD7
BRD9
BRE
BRINP1
BRINP2
BRINP3
BRIP1
BRS3
BRWD1
BSN
BST2
BTAF1
BTBD11
BTBD16
BTBD19
BTBD3
BTBD8
BTG1
BTG2
BUB3
BZW1
C10ORF11
C10ORF62
C10ORF76
C10ORF90
C11ORF1
C11ORF42
C11ORF49
C12ORF42
C12ORF43
C12ORF49
C12ORF66
C12ORF74
C12ORF75
C14ORF142
C14ORF159
C14ORF28
C14ORF37
C14ORF93
C15ORF27
C15ORF39
C15ORF53
C15ORF57
C16ORF72
C16ORF82
C17ORF53
C1D
C1GALT1
C1ORF106
C1ORF110
C1ORF116
C1ORF140
C1ORF158
C1ORF168
C1ORF174
C1ORF21
C1ORF220
C1ORF56
C1ORF61
C1ORF87
C1QL2
C1QTNF3
C1QTNF4
C20ORF194
C20ORF196
C20ORF202
C20ORF85
C21ORF2
C21ORF91
C22ORF31
C22ORF39
C2CD3
C2CD4B
C2ORF54
C2ORF57
C2ORF61
C2ORF71
C2ORF76
C3
C3ORF17
C3ORF52
C3ORF56
C3ORF58
C3ORF67
C4BPA
C4ORF26
C4ORF32
C4ORF50
C5ORF28
C5ORF34
C5ORF38
C6
C6ORF106
C6ORF203
C6ORF223
C7
C7ORF25
C7ORF33
C7ORF60
C7ORF66
C7ORF71
C8B
C8ORF34
C8ORF58
C9
C9ORF131
C9ORF135
C9ORF16
C9ORF163
C9ORF171
C9ORF3
C9ORF41
C9ORF43
C9ORF47
C9ORF50
C9ORF62
C9ORF66
C9ORF9
CA10
CA12
CAB39
CABIN1
CABP5
CACHD1
CACNA1B
CACNA1C
CACNA1D
CACNA1E
CACNA1G
CACNA2D3
CACNA2D4
CACNB2
CACNB3
CACNB4
CACNG7
CACUL1
CAD
CADM1
CADM2
CADM3
CADPS
CALB1
CALB2
CALCR
CALCRL
CALM1
CALM2
CALM3
CALML5
CALN1
CAMK1D
CAMK2G
CAMKK1
CAMSAP2
CAMTA1
CAP2
CAPN13
CAPN14
CAPN15
CAPN8
CAPZA3
CASC10
CASK
CASP1
CASZ1
CAV1
CBLN1
CBLN4
CBR4
CBWD1
CBWD5
CBX1
CBX3
CBX4
CBX7
CCBE1
CCDC102A
CCDC112
CCDC125
CCDC13
CCDC138
CCDC140
CCDC148
CCDC149
CCDC150
CCDC167
CCDC171
CCDC177
CCDC18
CCDC185
CCDC24
CCDC25
CCDC28A
CCDC3
CCDC34
CCDC47
CCDC64
CCDC80
CCDC81
CCDC88A
CCDC91
CCDC92
CCDC93
CCDC97
CCKBR
CCL2
CCL7
CCM2
CCNA1
CCND3
CCNG1
CCNL1
CCNY
CCR4
CCRL2
CCSAP
CCSER1
CCSER2
CCT6B
CCZ1B
CD109
CD151
CD160
CD1B
CD2
CD200
CD200R1L
CD247
CD276
CD300E
CD302
CD34
CD36
CD3E
CD3EAP
CD40LG
CD46
CD48
CD55
CD58
CD59
CD82
CD83
CD8A
CD93
CD96
CDC14A
CDC27
CDC42BPA
CDC42BPB
CDC42EP1
CDC42EP3
CDC42EP4
CDC6
CDC7
CDC73
CDCA7L
CDH12
CDH13
CDH22
CDH23
CDH4
CDH8
CDHR2
CDK13
CDK14
CDK15
CDK17
CDK3
CDK5RAP2
CDK5RAP3
CDK6
CDK8
CDKN1A
CDKN2AIP
CDKN3
CDYL
CDYL2
CEBPB
CELA3B
CELF1
CELF2
CELF4
CENPF
CENPO
CEP120
CEP135
CEP152
CEP162
CEP164
CEP192
CEP44
CEP55
CER1
CERK
CERS6
CES5A
CETN1
CFAP126
CFAP36
CFAP43
CFAP45
CFAP52
CFAP58
CFLAR
CGGBP1
CHAF1B
CHCHD3
CHCHD6
CHD1L
CHD2
CHD6
CHD7
CHD9
CHGB
CHI3L1
CHI3L2
CHIA
CHL1
CHM
CHN1
CHN2
CHP1
CHP2
CHRM2
CHRM3
CHST1
CHST3
CHST8
CHSY3
CISD1
CISH
CIZ1
CKAP2L
CKAP5
CKM
CKS2
CLASP1
CLCA4
CLCF1
CLDN1
CLDN18
CLDN2
CLDN22
CLDN23
CLEC14A
CLEC16A
CLEC4A
CLIC4
CLIC5
CLINT1
CLIP2
CLIP4
CLK2
CLMN
CLPB
CLPTM1
CLRN1
CLSTN1
CLSTN2
CLTA
CLVS2
CMC1
CMIP
CMKLR1
CMPK1
CMTM3
CMTM7
CMTM8
CMTR1
CMTR2
CMYA5
CNBD1
CNDP2
CNGA2
CNGA3
CNN1
CNNM1
CNTN1
CNTN3
CNTN4
CNTN5
CNTN6
CNTNAP2
CNTNAP4
CNTNAP5
CNTROB
COA1
COA5
COA6
COA7
COBL
COBLL1
COG2
COG3
COL12A1
COL18A1
COL19A1
COL21A1
COL22A1
COL23A1
COL24A1
COL25A1
COL27A1
COL28A1
COL3A1
COL4A6
COL5A2
COL6A3
COL6A5
COL8A1
COLEC11
COMMD10
COMMD2
COMMD8
COMMD9
COPS2
COPS3
COPZ2
COQ10B
COQ4
COQ6
CORIN
CORO2B
CORO6
COX10
COX18
COX7B2
CP
CPA4
CPA6
CPE
CPEB1
CPEB2
CPEB3
CPEB4
CPNE2
CPNE4
CPNE8
CPQ
CPS1
CPSF2
CPSF6
CPVL
CPZ
CRACR2A
CRB1
CRCT1
CREB1
CREB5
CRH
CRHR2
CRIM1
CRIPT
CRISP3
CRISPLD1
CRTAC1
CRY1
CRYBG3
CSAD
CSDE1
CSF1
CSGALNACT1
CSMD1
CSNK1A1L
CSNK1E
CSNK1G1
CSNK1G3
CSNK2A1
CSRNP1
CSRP2BP
CST5
CST6
CSTF2
CT55
CTF1
CTGF
CTH
CTIF
CTLA4
CTNNA2
CTNNA3
CTNNBL1
CTNND1
CTNND2
CTPS2
CTSC
CTXN3
CUBN
CUEDC1
CUL4A
CUX2
CUZD1
CWC15
CWC22
CWC27
CWF19L2
CWH43
CXCL12
CXCL2
CXCR4
CXORF36
CXORF66
CYB5D1
CYFIP1
CYFIP2
CYLD
CYP1B1
CYP24A1
CYP26C1
CYP27A1
CYP27C1
CYP2A6
CYP2C9
CYP2E1
CYP39A1
CYP4A11
CYP7B1
CYR61
CYSLTR1
CYSTM1
CYTH1
CYYR1
DAAM1
DAB1
DAB2IP
DACT2
DAP
DAPK1
DARS2
DBNDD2
DBR1
DBT
DCAF12L2
DCAF4L2
DCAF5
DCAF6
DCAF8L1
DCBLD2
DCC
DCDC2
DCHS1
DCLK1
DCP1B
DCSTAMP
DCTN3
DCTN5
DCUN1D1
DCUN1D4
DDAH1
DDC
DDHD1
DDIT4
DDR2
DDX10
DDX20
DDX26B
DDX28
DDX3X
DDX42
DDX47
DDX51
DDX56
DDX59
DECR1
DEDD
DEF6
DEFB133
DEFB134
DEGS2
DENND1A
DENND1B
DENND2C
DENND4A
DENND5A
DERA
DEXI
DFNA5
DGAT2
DGKB
DGKG
DGKH
DGKI
DHRS2
DHRS3
DHX15
DHX57
DHX8
DHX9
DIAPH2
DIAPH3
DICER1
DIDO1
DIEXF
DIP2B
DIP2C
DIRAS3
DIS3L
DIS3L2
DISC1
DISP1
DKK2
DLC1
DLG2
DLG5
DLGAP1
DLGAP4
DLX1
DLX2
DLX6
DMAP1
DMBX1
DMD
DMRT2
DMRTA2
DMTF1
DMTN
DNAH11
DNAH12
DNAH14
DNAH17
DNAH5
DNAH7
DNAH9
DNAJA4
DNAJB12
DNAJB2
DNAJC1
DNAJC10
DNAJC15
DNAJC25
DNAJC27
DNAJC6
DNALI1
DNASE2B
DNHD1
DNM2
DNM3
DNMBP
DNTT
DNTTIP1
DOCK1
DOCK10
DOCK11
DOCK2
DOCK3
DOCK5
DOCK7
DOCK8
DOK5
DOPEY2
DPH1
DPH6
DPM1
DPP10
DPP6
DPT
DPYD
DPYS
DRD2
DSC2
DSCAML1
DSCR10
DSCR4
DSCR8
DSEL
DSG2
DST
DSTN
DTD2
DTL
DTNB
DTWD2
DTX3
DUOXA2
DUPD1
DUS2
DUSP1
DUSP10
DUSP13
DUSP14
DUSP16
DUSP22
DUSP26
DUSP4
DUSP5
DUSP6
DYM
DYNC1H1
DYNC2H1
DYNLRB2
DYRK2
DYTN
E2F3
E2F6
E2F7
EBF1
EBF2
EBF3
ECE1
ECHDC3
ECI2
ECT2
ECT2L
EDA2R
EDARADD
EDIL3
EDN1
EDN2
EDN3
EEA1
EEF1A1
EEPD1
EFCAB1
EFCAB7
EFEMP1
EFHD2
EFNA1
EFNA5
EFTUD1
EGFL7
EGFLAM
EGFR
EHBP1
EHD3
EHF
EHHADH
EIF1B
EIF2B2
EIF2S2
EIF3H
EIF3J
EIF3L
EIF4E
EIF4EBP1
EIF4G3
EIF5
ELAC1
ELAVL2
ELAVL4
ELF2
ELK1
ELL2
ELMO1
ELMOD1
ELOVL2
ELOVL5
ELP3
EMC2
EMILIN2
EMILIN3
EML1
EML4
EMP1
EMP2
EMX2
EMX2OS
ENAH
ENC1
ENDOD1
ENO1
ENOSF1
ENOX1
ENOX2
ENPP2
ENSA
ENTHD1
ENTPD4
EOMES
EPAS1
EPB41L1
EPB41L2
EPB41L4A
EPB41L4B
EPC2
EPDR1
EPG5
EPHA2
EPHA4
EPHA5
EPHA6
EPHB1
EPHB2
EPHB3
EPHB4
EPHX2
EPN2
EPSTI1
ERC1
ERC2
ERCC6L2
ERG
ERGIC1
ERI1
ERI3
ERICH1
ERICH3
ERMN
ERN1
ERN2
ERP29
ERRFI1
ESCO2
ESR1
ESRRG
ESX1
ETFA
ETFB
ETNK1
ETS1
ETS2
ETV3
ETV3L
ETV5
ETV6
ETV7
EVA1A
EVX2
EXO1
EXOC4
EXOC6
EXOSC3
EXPH5
EXT1
EXT2
EXTL2
EYA2
EYA3
EYA4
EZH2
F11R
F2RL1
F2RL2
F5
FA2H
FAF1
FAF2
FAH
FAM102B
FAM107B
FAM109A
FAM110B
FAM114A2
FAM118A
FAM120A
FAM122A
FAM124A
FAM126A
FAM127C
FAM129A
FAM131C
FAM133A
FAM134A
FAM134B
FAM135B
FAM13C
FAM149A
FAM155B
FAM159A
FAM160A1
FAM160B2
FAM161A
FAM163A
FAM167A
FAM168A
FAM168B
FAM169B
FAM170A
FAM171A1
FAM172A
FAM174B
FAM177A1
FAM178B
FAM179A
FAM180A
FAM181A
FAM183B
FAM184A
FAM188A
FAM189B
FAM196B
FAM19A1
FAM19A2
FAM210A
FAM219A
FAM222A
FAM229B
FAM32A
FAM43A
FAM45A
FAM49B
FAM50B
FAM53B
FAM53C
FAM58BP
FAM60A
FAM71A
FAM71C
FAM71D
FAM71F1
FAM76B
FAM78B
FAM83A
FAM83F
FAM84A
FAM86C1
FAM91A1
FAM9B
FAM9C
FAN1
FANCC
FANCD2
FANK1
FAR1
FAR2
FARSB
FAS
FASLG
FAT1
FAT2
FAT3
FAXC
FBLN2
FBLN5
FBN1
FBN2
FBP1
FBXL13
FBXL17
FBXL3
FBXL7
FBXO17
FBXO21
FBXO31
FBXO34
FBXO42
FBXO9
FBXW11
FBXW12
FBXW2
FBXW4
FBXW8
FCRL4
FCRL5
FEM1B
FEM1C
FER1L4
FER1L6
FERMT1
FEZF1
FGD4
FGD6
FGF1
FGF10
FGF12
FGF13
FGF17
FGF5
FGF7
FGF8
FGFR1
FGFR1OP
FGFR2
FGFR4
FGGY
FH
FHIT
FHL1
FHL2
FHL3
FHOD3
FIBIN
FIG4
FIGLA
FIGN
FIGNL1
FILIP1
FILIP1L
FKBP5
FKBP9
FKSG49
FKTN
FLNB
FLOT1
FLRT2
FLRT3
FLT1
FLVCR2
FMN2
FMNL3
FMOD
FMR1NB
FN1
FNBP1L
FNBP4
FNDC1
FNDC7
FOPNL
FOS
FOSL2
FOXA2
FOXC1
FOXD1
FOXD2
FOXG1
FOXI1
FOXI2
FOXL2
FOXL2NB
FOXN1
FOXN3
FOXN4
FOXO1
FOXO3
FOXP1
FOXP2
FOXP4
FOXQ1
FPR3
FRAS1
FRAT1
FREM1
FREM2
FRG2C
FRMD3
FRMD4A
FRMPD1
FRRS1
FRRS1L
FRS2
FRY
FRZB
FSCN1
FSHB
FSIP1
FST
FSTL1
FSTL4
FSTL5
FUBP3
FUK
FURIN
FUT10
FUT8
FXYD6
FZD1
FZD2
FZD4
FZD7
FZD8
G0S2
G3BP1
G3BP2
GAB1
GAB2
GAB3
GABBR2
GABPA
GABRA1
GABRA2
GABRA3
GABRB3
GABRG3
GABRQ
GABRR2
GAD1
GAD2
GADD45A
GALNT10
GALNT11
GALNT13
GALNT14
GALNT15
GALNT18
GALNT2
GALNT3
GALNT7
GALNTL6
GANAB
GAP43
GAPVD1
GARNL3
GARS
GAS2L1
GAS5
GAS7
GATA3
GATA4
GATA6
GATM
GBP4
GBP5
GC
GCC1
GCFC2
GCLM
GCM1
GCN1L1
GCNT1
GCNT2
GCOM1
GDA
GDAP1
GDAP2
GDF3
GEMIN7
GEMIN8
GEN1
GFPT1
GFPT2
GFRA1
GFRA2
GGPS1
GGTLC1
GID4
GIMAP2
GIMAP4
GIMAP8
GINS3
GIP
GIPC2
GJA1
GJA5
GJB3
GJB5
GKAP1
GLCCI1
GLCE
GLDC
GLI3
GLIPR2
GLIS1
GLIS3
GLIS3-AS1
GLRA1
GLRA2
GLRA4
GLRX
GLRX3
GLRX5
GLRXP3
GLS
GLT1D1
GLTSCR1
GLUL
GMCL1
GMEB1
GMFB
GMNN
GNA12
GNA13
GNA14
GNA15
GNAL
GNAO1
GNAQ
GNG12
GNG2
GNG4
GNL2
GNPNAT1
GNS
GOLGA7B
GON4L
GORAB
GOSR1
GOT1
GPATCH11
GPATCH8
GPBP1
GPC3
GPC4
GPC6
GPD1L
GPD2
GPHB5
GPHN
GPM6B
GPN3
GPR101
GPR12
GPR143
GPR155
GPR156
GPR161
GPR37
GPR39
GPR45
GPR78
GPR87
GPRC5A
GPRIN2
GPRIN3
GPT2
GRAMD3
GRAP2
GRB14
GREB1
GREB1L
GRHL2
GRHL3
GRIA1
GRIA2
GRIA3
GRIA4
GRID1
GRID2
GRIK1
GRIK3
GRIK4
GRIN2A
GRIN2B
GRIN3A
GRIP1
GRM1
GRM3
GRM4
GRM7
GRM8
GRP
GRPR
GRSF1
GSC
GSDMC
GSS
GTDC1
GTF2B
GTF2H2
GTF3C1
GTF3C6
GTPBP4
GUCA1C
GUCA2A
GUCY1A2
GUCY1A3
GUCY1B2
GUCY2D
GULP1
GUSBP4
GYG1
GYPC
GYPE
H2AFY
H2AFY2
H2BFM
H2BFXP
HABP2
HACD2
HADH
HAND1
HAO1
HCAR3
HCCS
HCFC1R1
HCN1
HDAC8
HDAC9
HDDC2
HDGF
HDGFL1
HEATR6
HECTD4
HECW2
HELT
HELZ
HERC1
HEXA
HEXB
HEY1
HHAT
HIAT1
HIBADH
HIC1
HIF1A
HINT3
HIPK1
HIPK3
HIST1H1T
HIST1H2AM
HIST1H2BB
HIST1H2BD
HIST1H2BK
HIST2H2AA3
HIST2H2BE
HIST2H3PS2
HIVEP1
HIVEP2
HIVEP3
HLF
HLX
HMCN1
HMGA2
HMGB3
HMGB4
HMGCR
HMGN1
HMGXB4
HMP19
HNF1B
HNF4A
HNF4G
HNRNPA2B1
HNRNPD
HNRNPF
HNRNPM
HNRNPR
HOMER1
HOMER2
HOOK3
HOXA2
HOXB1
HOXB13
HOXD13
HOXD3
HPDL
HPSE2
HRH2
HRK
HRNR
HS2ST1
HS3ST1
HS3ST2
HS3ST3A1
HS3ST3B1
HS6ST1
HS6ST2
HSD11B1
HSD17B10
HSD17B12
HSD17B14
HSD17B4
HSD17B6
HSPA12A
HSPA8
HSPB8
HSPH1
HTATIP2
HTATSF1
HTR1A
HTR1E
HTR2C
HTR4
HTR5A
HTR6
HTR7
HTRA1
HTT
HUWE1
HYDIN
HYPM
ICA1
ICA1L
ICOS
ID1
ID2
ID3
IDNK
IDO2
IER3
IER3IP1
IFI44
IFIT1B
IFIT3
IFNAR1
IFNLR1
IFT43
IFT74
IGBP1
IGF1
IGF1R
IGF2BP1
IGFBP3
IGFBP7
IGFBPL1
IGSF1
IGSF11
IGSF21
IKZF2
IL10RA
IL12B
IL12RB2
IL15
IL17F
IL17RA
IL17RD
IL18R1
IL19
IL1B
IL1R1
IL1RAPL1
IL1RL1
IL1RL2
IL20RA
IL22RA2
IL23A
IL33
IL37
IL9
ILDR1
ILDR2
IMMP2L
IMPAD1
IMPG2
INADL
INF2
INO80D
INPP4A
INPP4B
INPP5A
INPP5F
INSIG2
INSL6
INSR
INTS7
INTS9
INTU
IPMK
IPO8
IQCF3
IQGAP2
IQSEC1
IRAK2
IRF2
IRF2BP1
IRF2BP2
IRF2BPL
IRS1
IRS2
IRX3
IRX4
IRX6
ISCA1P1
ISL1
ITGA11
ITGA2
ITGA4
ITGA6
ITGA9
ITGAD
ITGAE
ITGB1
ITGB5
ITGB6
ITGBL1
ITIH5
ITLN2
ITPKB
ITPR1
IVL
IVNS1ABP
IWS1
IYD
JADE1
JAG1
JAG2
JAK2
JAKMIP1
JAKMIP3
JAM2
JARID2
JAZF1
JKAMP
JMJD1C
JUND
KALRN
KANK1
KANSL2
KAT6A
KAT6B
KATNBL1
KCNA4
KCNA5
KCNAB1
KCNB1
KCNB2
KCNC2
KCNC3
KCNC4
KCND2
KCND3
KCNE4
KCNF1
KCNG4
KCNH1
KCNH3
KCNH7
KCNH8
KCNIP1
KCNIP2
KCNIP4
KCNJ10
KCNJ12
KCNJ13
KCNJ15
KCNJ16
KCNJ3
KCNK1
KCNK10
KCNK12
KCNK2
KCNK3
KCNK5
KCNK9
KCNMA1
KCNMB1
KCNMB3
KCNN2
KCNN3
KCNQ1DN
KCNQ1OT1
KCNQ3
KCNS3
KCNT2
KCNV2
KCTD1
KCTD13
KCTD16
KCTD4
KCTD6
KCTD8
KDM1A
KDM4C
KDM5A
KDM6A
KDM7A
KDM8
KDR
KHDRBS2
KHDRBS3
KIAA0020
KIAA0196
KIAA0226
KIAA0226L
KIAA0232
KIAA0319L
KIAA0556
KIAA0753
KIAA0754
KIAA0825
KIAA0895
KIAA0922
KIAA0930
KIAA1024
KIAA1211
KIAA1217
KIAA1324
KIAA1324L
KIAA1407
KIAA1456
KIAA1467
KIAA1549
KIAA1551
KIAA1671
KIAA1804
KIAA1841
KIDINS220
KIF13A
KIF14
KIF20B
KIF21A
KIF23
KIF26B
KIF2B
KIF3B
KIF5B
KIF5C
KIF6
KIF9
KIFAP3
KIFC3
KIRREL
KIT
KIZ
KL
KLF10
KLF2
[truncated: 2,431 more rows]

## Sheet: E2F4 Target Gene
Gene
2021-09-15
AAAS
AAK1
AAMDC
AARS
ABCA17P
ABCA3
ABCB10
ABCB9
ABCC4
ABCD3
ABHD13
ABHD17C
ABHD2
ABHD4
ABI1
ABTB2
ACAD8
ACADM
ACAT1
ACBD5
ACBD6
ACBD7
ACD
ACER3
ACIN1
ACOT4
ACOT7
ACOX1
ACP1
ACP2
ACSF3
ACTA2
ACTN3
ACTN4
ACTR1A
ACTR6
ACYP1
ADAL
ADAM10
ADAM12
ADAM15
ADARB2
ADAT1
ADCK1
ADCK3
ADCK4
ADCY9
ADD3
ADGRB2
ADGRL2
ADIPOR1
ADK
ADM
ADO
ADORA2B
ADPGK
ADPRHL2
ADPRM
ADRB1
ADRBK1
ADSS
AEN
AFG3L1P
AGL
AGO1
AGO3
AGTRAP
AHCYL1
AHDC1
AHI1
AHNAK
AIDA
AIFM2
AIM1
AIP
AK2
AK7
AKAP10
AKAP11
AKAP13
AKAP5
AKIP1
AKIRIN1
AKIRIN2
AKR1A1
AKR1B1
AKR7A2
AKTIP
ALDH18A1
ALDH3A2
ALDOA
ALG10
ALG10B
ALG11
ALG5
ALG6
ALG8
ALG9
ALKBH5
ALKBH8
ALOX5
ALOXE3
AMD1
AMDHD1
AMDHD2
AMFR
AMN1
ANAPC15
ANAPC16
ANAPC5
ANG
ANGEL1
ANGEL2
ANGPTL5
ANKFY1
ANKH
ANKLE2
ANKRD10
ANKRD13A
ANKRD13C
ANKRD13D
ANKRD16
ANKRD26
ANKRD49
ANKRD52
ANKS3
ANLN
ANO6
ANP32A
ANP32E
ANXA2
AP2A1
AP2A2
AP2S1
AP3S2
AP4B1
AP4E1
AP5M1
APAF1
APEX1
APH1A
API5
APIP
APITD1
APLP2
APOA1
APOA1BP
APOLD1
APOPT1
APRT
AQP11
AQP6
ARAP2
ARF1
ARF6
ARFGAP2
ARG2
ARGLU1
ARHGAP11A
ARHGAP11B
ARHGAP17
ARHGAP19
ARHGAP21
ARHGAP5
ARHGEF11
ARHGEF12
ARHGEF17
ARID1A
ARID2
ARID3B
ARID5B
ARIH1
ARL1
ARL14EP
ARL15
ARL2
ARL2BP
ARL3
ARL5B
ARL6
ARL6IP1
ARL6IP4
ARL6IP6
ARNTL
ARNTL2
ARPC2
ARPC5
ARPP19
ARRB1
ARRB2
ARV1
ASAH2B
ASB16-AS1
ASCC1
ASCL2
ASF1B
ASIC1
ASPHD1
ASPM
ASRGL1
ASUN
ATAD2
ATAD3A
ATAD3B
ATAD5
ATE1
ATF1
ATF6
ATF7IP
ATG101
ATG13
ATG16L2
ATG2A
ATG2B
ATG3
ATG4C
ATL1
ATL3
ATM
ATP10A
ATP11A
ATP13A2
ATP1A1
ATP1A1-AS1
ATP1B1
ATP2A1
ATP2A2
ATP2A3
ATP2B4
ATP5B
ATP5C1
ATP5G1
ATP5S
ATP6V0A2
ATP6V0B
ATP6V0D1
ATP7B
ATP9A
ATPAF1
ATPAF2
ATPIF1
ATRNL1
ATXN2
ATXN2L
ATXN7L2
AUNIP
AURKAIP1
AURKB
AVEN
AVPI1
B2M
B3GALNT2
B3GALT6
B3GALTL
B3GAT3
B3GNT1
B4GALNT1
B4GALT2
BAD
BAG5
BAMBI
BANP
BARD1
BAZ1A
BBIP1
BCAR3
BCDIN3D
BCKDK
BCL10
BCL2L10
BCL7A
BCL7C
BET1L
BICD1
BIRC2
BIRC3
BIRC5
BIVM
BLM
BLOC1S1
BLOC1S2
BMF
BMP2K
BMPR1A
BNIP2
BNIP3
BOLA1
BORA
BRCA1
BRCA2
BRD2
BRD7
BRD8
BRF1
BRI3BP
BRIP1
BRIX1
BRMS1
BROX
BTAF1
BTBD1
BTBD10
BTBD11
BTBD6
BTBD7
BTG1
BTRC
BUB1
BUB1B
BUB3
BUD13
C10ORF111
C10ORF2
C10ORF25
C10ORF54
C10ORF88
C10ORF95
C11ORF24
C11ORF30
C11ORF31
C11ORF48
C11ORF57
C11ORF58
C11ORF68
C11ORF71
C11ORF80
C11ORF84
C12ORF29
C12ORF4
C12ORF49
C12ORF57
C12ORF60
C12ORF65
C14ORF1
C14ORF119
C14ORF142
C14ORF166
C14ORF169
C14ORF178
C14ORF2
C14ORF80
C14ORF93
C15ORF39
C15ORF40
C15ORF41
C16ORF13
C16ORF52
C16ORF58
C16ORF59
C16ORF70
C16ORF71
C16ORF72
C16ORF86
C16ORF87
C17ORF49
C17ORF59
C17ORF62
C17ORF85
C17ORF97
C1ORF106
C1ORF109
C1ORF112
C1ORF115
C1ORF122
C1ORF123
C1ORF131
C1ORF159
C1ORF174
C1ORF194
C1ORF204
C1ORF21
C1ORF216
C1ORF27
C1ORF35
C1ORF50
C1ORF52
C1ORF56
C1ORF74
C1QBP
C1QTNF9B-AS1
C21ORF58
C2CD3
C2CD5
C9ORF156
C9ORF40
C9ORF72
CAB39L
CACHD1
CACNB2
CACUL1
CACYBP
CALM1
CALM2
CAMK1D
CAMK4
CAMKK1
CAMKK2
CAMLG
CAMTA1
CAND1
CAP1
CAPRIN1
CAPRIN2
CAPZA1
CARHSP1
CARS
CASC10
CASC5
CASP7
CASP8
CASP8AP2
CATSPER2P1
CBFB
CBL
CBX5
CCAR1
CCBL1
CCBL2
CCDC101
CCDC122
CCDC15
CCDC176
CCDC18
CCDC23
CCDC28A
CCDC34
CCDC38
CCDC53
CCDC59
CCDC6
CCDC64
CCDC7
CCDC77
CCDC82
CCDC83
CCDC84
CCDC85B
CCDC87
CCDC88C
CCDC90B
CCDC92
CCNA2
CCNB1
CCNB2
CCND2
CCNDBP1
CCNF
CCNG2
CCNJ
CCNK
CCNL2
CCNT1
CCNT2
CCNY
CCP110
CCPG1
CCS
CCSAP
CCSER2
CCT2
CCT3
CD2BP2
CD3EAP
CD46
CD55
CD58
CD59
CD63
CDAN1
CDC123
CDC14A
CDC16
CDC20
CDC23
CDC25C
CDC42BPB
CDC42EP2
CDC42SE1
CDC45
CDC6
CDC7
CDC73
CDCA2
CDCA3
CDCA4
CDCA5
CDCA7
CDCA8
CDIP1
CDK10
CDK11A
CDK11B
CDK13
CDK17
CDK19
CDK2
CDK2AP2
CDK4
CDK5RAP2
CDK5RAP3
CDK6
CDKAL1
CDKN1A
CDKN1B
CDKN1C
CDKN2C
CDKN2D
CDKN3
CDNF
CDR2
CDT1
CELF1
CEMP1
CENPA
CENPF
CENPI
CENPJ
CENPL
CENPM
CENPN
CENPQ
CENPT
CENPV
CENPW
CEP126
CEP152
CEP290
CEP295
CEP41
CEP44
CEP55
CEP57
CEP76
CEP83
CEP85
CEP97
CEPT1
CERS2
CERS5
CFAP20
CFAP43
CFAP57
CFAP58
CFDP1
CFL1
CGRRF1
CH25H
CHAC1
CHAT
CHCHD1
CHCHD2
CHCHD3
CHD1
CHD1L
CHD4
CHD8
CHD9
CHEK1
CHKA
CHM
CHMP1A
CHMP4A
CHMP6
CHORDC1
CHP1
CHPT1
CHRNA5
CHST11
CHST12
CHSY1
CHTF18
CHTF8
CHTOP
CHUK
CIB2
CIC
CIDEB
CINP
CIPC
CIRH1A
CISD1
CIT
CITED4
CKAP2
CKAP4
CKAP5
CKB
CKLF
CKS1B
CLCC1
CLCN7
CLEC16A
CLIP1
CLK1
CLK3
CLN5
CLN6
CLP1
CLPB
CLSPN
CLTA
CLUAP1
CLUH
CLYBL
CMC2
CMIP
CMPK1
CMSS1
CMTM4
CNEP1R1
CNIH1
CNN3
CNNM2
CNOT1
CNOT2
CNOT4
CNPY2
CNST
CNTROB
COA4
COA7
COCH
COG1
COG2
COG4
COG8
COL16A1
COMMD3
COMMD4
COMTD1
COPB1
COPRS
COPS3
COPS7A
COQ10A
COQ4
COQ6
COQ7
CORO1B
CORO1C
CORO7
COTL1
COX10
COX15
COX20
COX4I1
COX5A
COX6C
COX8A
CPEB3
CPNE2
CPNE7
CPNE8
CPSF2
CPSF3L
CPSF6
CPT2
CPTP
CR1L
CRAMP1L
CREB3L4
CREBBP
CREBZF
CREG1
CREM
CRK
CROCC
CRY1
CRYL1
CSDE1
CSGALNACT2
CSRNP2
CSRP1
CSRP2
CSTF1
CSTF2T
CSTF3
CTBP2
CTC1
CTCF
CTDNEP1
CTDSP1
CTDSPL2
CTH
CTNS
CTPS1
CTSC
CTSD
CTU2
CUEDC2
CUL3
CUL4A
CUL5
CUTC
CUX1
CWC15
CWF19L1
CXCR4
CXXC1
CYB561A3
CYB5B
CYB5D1
CYB5R4
CYLD
CYP27B1
CYP2R1
CYP46A1
DAP3
DAPK2
DARS
DARS2
DBIL5P
DCAF11
DCAF4
DCAF5
DCAF6
DCAF8
DCDC1
DCLRE1A
DCLRE1B
DCLRE1C
DCP2
DCTN5
DCUN1D2
DCUN1D3
DCUN1D5
DDAH1
DDB1
DDB2
DDHD1
DDI2
DDIAS
DDIT4
DDOST
DDX10
DDX11
DDX12P
DDX17
DDX19A
DDX19B
DDX20
DDX21
DDX23
DDX24
DDX39A
DDX50
DDX51
DDX54
DDX55
DDX59
DDX6
DEAF1
DECR2
DEGS1
DEK
DENND1B
DENND2C
DENND5A
DENR
DEPDC1
DEPDC1B
DEPDC4
DERA
DERL2
DESI2
DEXI
DFFA
DGAT2
DHCR24
DHCR7
DHDDS
DHODH
DHPS
DHRS1
DHRS12
DHRS13
DHRS3
DHRS7
DHRS7B
DHTKD1
DHX15
DHX38
DHX9
DIABLO
DIAPH1
DIAPH3
DICER1
DIEXF
DIS3L
DLEU1
DLEU2
DLG5
DLGAP5
DLST
DLX1
DMAP1
DMTF1
DMXL2
DNA2
DNAAF1
DNAAF2
DNAH14
DNAH3
DNAJA2
DNAJA3
DNAJB12
DNAJC1
DNAJC11
DNAJC17
DNAJC24
DNAJC3
DNAJC9
DNER
DNM1L
DNMBP
DNTTIP2
DOCK7
DOCK9
DPF1
DPF2
DPH5
DPH6
DPP3
DPYD
DR1
DRAM1
DRAM2
DRAP1
DRG1
DRG2
DROSHA
DSCC1
DSN1
DTL
DTWD1
DUSP12
DUSP16
DUSP23
DUSP5
DUT
DVL1
DVL2
DYNC1H1
DYNC1I2
DYNC1LI2
DYNLL1
DYNLRB2
DYRK2
DYRK3
E2F2
E2F3
E2F7
E2F8
E4F1
EARS2
EBNA1BP2
ECD
ECE1
ECHDC1
ECHDC2
ECHS1
ECI1
EDC3
EDC4
EDRF1
EEA1
EED
EEF1G
EEF2K
EFCAB11
EFCAB14
EFCAB2
EFCAB7
EFHD2
EFNB2
EGLN3
EGR2
EHD1
EHD4
EHMT2
EI24
EID1
EID3
EIF2B1
EIF2B2
EIF3A
EIF3F
EIF3J
EIF3M
EIF4A2
EIF4B
EIF4EBP2
EIF4G2
EIF4G3
EIF5
EIF5A
ELAC2
ELK3
ELK4
ELL3
ELMSAN1
ELOVL1
ELP5
EMC1
EMC3
EMC6
EMC8
EMC9
EME2
EML1
EML5
ENAH
ENDOD1
ENKD1
ENKUR
ENO1
ENO2
ENO3
ENOSF1
ENOX1
ENTPD4
ENTPD7
EP400
EPC1
EPS8
ERAL1
ERC1
ERCC5
ERH
ERI2
ERI3
ERLIN1
ERMAP
ERO1L
ERO1LB
ERP29
ERRFI1
ESCO2
ESD
ESPL1
ESPN
ESRRA
ESYT1
ESYT2
ETFA
ETNK1
ETV3
EXD1
EXO1
EXO5
EXOC5
EXOC8
EXOSC1
EXOSC10
EXOSC6
EXOSC8
EXOSC9
EXPH5
FADD
FADS1
FADS2
FADS3
FAF1
FAHD1
FAM109A
FAM111A
FAM111B
FAM129A
FAM149B1
FAM160A2
FAM160B1
FAM161B
FAM168A
FAM173A
FAM175B
FAM178A
FAM192A
FAM20B
FAM212B
FAM214A
FAM216A
FAM219B
FAM227B
FAM24B
FAM35A
FAM45A
FAM45B
FAM46B
FAM46C
FAM53B
FAM57A
FAM60A
FAM63A
FAM63B
FAM64A
FAM69A
FAM76A
FAM76B
FAM78B
FAM81A
FAM83G
FAM89B
FAM96A
FAM98B
FAN1
FANCA
FANCC
FANCD2
FANCF
FANCI
FANCM
FANK1
FAR1
FAS
FBN1
FBXL13
FBXL14
FBXL15
FBXL17
FBXL19
FBXL19-AS1
FBXL20
FBXL3
FBXL8
FBXO18
FBXO21
FBXO22
FBXO28
FBXO31
FBXO33
FBXO34
FBXO42
FBXO5
FBXO8
FBXW4
FBXW8
FCHSD2
FDPS
FDX1
FDXR
FEM1B
FEN1
FGD6
FGF9
FGFBP3
FGFR1OP2
FGGY
FH
FHOD1
FHOD3
FIBP
FICD
FJX1
FKBP2
FKBP3
FKBP4
FLAD1
FLI1
FLII
FLJ37453
FLOT2
FLVCR1
FLVCR2
FLYWCH1
FLYWCH2
FMNL3
FNBP1L
FNDC3A
FNTB
FOPNL
FOS
FOSB
FOSL1
FOXD2
FOXM1
FOXN3
FOXN4
FOXO1
FOXRED1
FRAT1
FRAT2
FRMD8
FSIP1
FTH1
FUBP1
FUK
FUS
FUT11
FUT4
FUT8
FXR2
FYN
G2E3
GAB2
GABARAP
GABARAPL2
GABPB1
GABPB2
GADD45A
GALE
GALNS
GALNT18
GALNT2
GALNT4
GAN
GANAB
GAPDH
GARS
GAS2L3
GATC
GATM
GBA
GBAP1
GCH1
GCHFR
GCLM
GCSH
GDE1
GDI2
GDPD5
GEMIN4
GFER
GFI1
GGA2
GID4
GINS2
GINS3
GINS4
GJA3
GLCE
GLG1
GLIPR1L2
GLMN
GLOD4
GLRX2
GLRX3
GLRX5
GLS2
GLTP
GLTPD2
GLUD1
GLUL
GLYR1
GMEB1
GMNN
GNAI3
GNB1
GNB2L1
GNG5
GNL2
GNPAT
GNPNAT1
GNPTG
GNS
GOLGA8B
GOLT1B
GON4L
GORAB
GORASP2
GPAM
GPANK1
GPHN
GPN2
GPN3
GPR137
GPR137C
GPR157
GPR180
GPR3
GPR88
GPS2
GPSM2
GPT2
GRHL3
GRIN2A
GRK5
GSE1
GSG2
GSK3A
GSPT1
GSTO1
GSTO2
GSTP1
GSTZ1
GTF2A1
GTF2F2
GTF2H1
GTF2H3
GTF3A
GTF3C5
GTPBP4
GTSE1
GXYLT1
GYPC
H2AFJ
H2AFV
H2AFX
H3F3A
H6PD
HACD2
HACD3
HAGH
HARBI1
HAS3
HAT1
HAUS1
HAUS2
HAUS4
HAUS8
HCFC1R1
HCFC2
HCN3
HDAC1
HDDC3
HDGF
HDGFRP3
HEATR1
HECTD1
HECTD2
HECTD3
HELLS
HERC1
HERPUD1
HES7
HEXA
HEXIM1
HEXIM2
HFM1
HHAT
HHEX
HHLA3
HIAT1
HIC1
HIF1A
HIPK1
HIPK3
HIRA
HIRIP3
HIST1H1B
HIST1H1C
HIST1H1D
HIST1H2AG
HIST1H2AJ
HIST1H2AL
HIST1H2BI
HIST1H2BJ
HIST1H2BK
HIST1H2BM
HIST1H2BO
HIST1H3B
HIST1H3D
HIST1H3G
HIST1H3H
HIST1H3I
HIST1H4A
HIST1H4B
HIST1H4D
HIST1H4E
HIST1H4H
HIST1H4K
HIST1H4L
HIST2H2AC
HIST2H2BE
HLTF
HMBS
HMG20A
HMGB1
HMGB2
HMGN2
HMGN5
HMMR
HMOX2
HMX2
HMX3
HN1L
HNRNPA0
HNRNPA1
HNRNPA1P10
HNRNPA2B1
HNRNPAB
HNRNPD
HNRNPF
HNRNPH3
HNRNPR
HNRNPU
HNRNPUL1
HNRNPUL2
HOOK3
HOXC4
HOXC5
HOXC6
HOXC8
HP1BP3
HPDL
HPS1
HPS5
HRAS
HS2ST1
HS3ST3B1
HSDL1
HSP90AA1
HSP90B1
HSPA14
HSPA2
HSPA4L
HSPA6
HSPA8
HSPB11
HSPH1
HYLS1
IARS2
IBA57
ICE2
ICMT
ID1
ID3
IDE
IDH2
IDH3A
IDI1
IER5
IFI27L1
IFIT5
IFT80
IGF1R
IGF2BP3
IGHMBP2
IKBIP
IL10RA
IL4R
ILDR2
ILK
IMP3
INCENP
INF2
ING1
ING3
ING4
INO80E
INPP5A
INPP5F
INPP5K
INSM2
INSRR
INTS4
INTS5
INTS6
INTS7
IPMK
IPO13
IPO4
IPO5
IPO7
IPO9
IQCC
IQCD
IQCG
IQCH
IQCK
IQGAP3
IRAK3
IRAK4
IREB2
IRF2BP2
IRF2BPL
IRF3
IRF7
IRF8
ISCA2
ISCU
ISG20L2
ISL2
ISLR2
ITFG1
ITFG2
ITFG3
ITGA11
ITGB3BP
ITPK1
ITPKA
ITPKB
ITPR2
IVNS1ABP
JDP2
JKAMP
JMJD1C
JMJD4
JMJD8
JRKL
JUN
JUNB
KANSL2
KARS
KAT6B
KAT7
KAT8
KATNAL1
KATNBL1
KAZALD1
KBTBD4
KBTBD7
KCNAB2
KCNC4
KCNH1
KCNK13
KCNMB4
KCNQ1OT1
KCTD12
KCTD13
KCTD3
KDELC1
KDM1A
KDM2A
KDM4D
KHDRBS1
KIAA0100
KIAA0101
KIAA0226L
KIAA0319L
KIAA0430
KIAA0513
KIAA0753
KIAA0907
KIAA1033
KIAA1143
KIAA1324
KIAA1429
KIAA1524
KIAA1551
KIF11
KIF14
KIF15
KIF18A
KIF1B
KIF1BP
KIF20A
KIF20B
KIF21A
KIF21B
KIF23
KIF26B
KIF2C
KIF4A
KIF5A
KIF5B
KIFAP3
KIFC1
KIN
KITLG
KLC1
KLC2
KLF12
KLF13
KLF5
KLF6
KLHDC2
KLHDC4
KLHL12
KLHL17
KLHL21
KLHL25
KLHL42
KLLN
KMT2A
KNOP1
KNSTRN
KNTC1
KPNA3
KPNB1
KRAS
KRTCAP2
KTN1
L2HGDH
L3HYPDH
L3MBTL2
LACC1
LACE1
LAMC1
LAMP1
LAMTOR2
LAMTOR5
LARP4
LATS2
LBR
LCMT2
LCOR
LDB1
LDHA
LDHB
LDLRAP1
LEF1
LEMD3
LEPR
LEPROT
LETMD1
LGALS3
LGMN
LHPP
LHX4
LIG4
LIN52
LIN9
LINC00167
LINC01465
LITAF
LIX1L
LLPH
LMAN1
LMNB1
LMNTD2
LMO4
LNX2
LOC100130987
LOC100134368
LOC145783
LOC148413
LOC153684
LOC284023
LOC374443
LOC642846
LOC652276
LOC81691
LOH12CR1
LOH12CR2
LPCAT3
LPGAT1
LPIN1
LRCH1
LRFN4
LRMP
LRP4
LRP8
LRR1
LRRC1
LRRC20
LRRC27
LRRC29
LRRC40
LRRC41
LRRC42
LRRC47
LRRC49
LRRC56
LRRC57
LRRC75A-AS1
LRRC8B
LRRC8C
LRRC8D
LRRK1
LRRK2
LRTOMT
LSM3
LSM4
LTB4R
LTB4R2
LTN1
LUC7L
LURAP1
LYPLAL1
LYRM1
LYSMD4
M6PR
MAD2L1
MAD2L2
MAGI3
MAGOH
MAGOHB
MALAT1
MAN1A2
MAN2A2
MAN2C1
MANBA
MANEAL
MANSC1
MAP2K1
MAP2K5
MAP3K11
MAP3K12
MAP3K6
MAP3K7
MAP3K8
MAP3K9
MAP4K5
MAP7D1
MAPK1IP1L
MAPK6
MAPK7
MAPK8IP3
MAPKAPK2
MAPKAPK5
MAPKAPK5-AS1
MAPKBP1
MARCKSL1
MARK3
MAST2
MASTL
MATR3
MAX
MAZ
MBD1
MBNL1
MC1R
MCAM
MCL1
MCM10
MCM3
MCM4
MCM5
MCM8
MCMBP
MCOLN3
MDH1
MDM1
MDM2
MDM4
MDP1
MEAF6
MED4
MED6
MED9
MEF2A
MEF2D
MEIS2
MESDC1
MESDC2
MESP1
MESP2
METAP2
METRN
METTL1
METTL10
METTL13
METTL15
METTL16
METTL18
METTL20
METTL25
METTL3
METTL4
METTL9
MEX3B
MEX3C
MFAP1
MFN2
MFSD2A
MGA
MGAT2
MGEA5
MGME1
MGMT
MGRN1
MGST3
MIB2
MICU1
MICU2
MIEF2
MIER1
MINK1
MINOS1
MINPP1
MIPEP
MIR22HG
MIRLET7I
MIS12
MIS18BP1
MKI67
MLEC
MLH3
MLKL
MLLT10
MLLT11
MLLT6
MLST8
MLXIP
MMAB
MMACHC
MMP15
MMS19
MMS22L
MNAT1
MND1
MNS1
MNT
MOAP1
MON1B
MORF4L1
MORN1
MOV10
MPC2
MPDU1
MPHOSPH6
MPHOSPH8
MPP5
MPV17
MRE11A
MRPL11
MRPL16
MRPL17
MRPL20
MRPL21
MRPL23
MRPL37
MRPL42
MRPL43
MRPL46
MRPL51
MRPL57
MRPS11
MRPS21
MRPS34
MRPS35
MRTO4
MSH3
MSH5
MSL2
MSRB1
MSTO1
MSTO2P
MT2A
MTA2
MTBP
MTCH2
MTERF2
MTERF3
MTF2
MTFMT
MTFR1L
MTFR2
MTHFD1
MTHFS
MTHFSD
MTMR10
MTMR6
MTPAP
MTR
MUC1
MUS81
MUT
MUTYH
MVD
MVK
MXI1
MYBBP1A
MYC
MYCBP
MYCL
MYEF2
MYH10
MYL6
MYL6B
MYO1C
MYO1E
MYO5A
MYO9A
MYOD1
MZT1
N4BP1
N4BP2L1
N6AMT2
NAA15
NAA16
NAA25
NAA38
NAA40
NABP2
NADK
NADSYN1
NAE1
NAGPA
NANOS1
NAP1L1
NAP1L4
NARFL
NASP
NBPF1
NBPF3
NCAM1
NCAPD2
NCAPD3
NCAPG2
NCDN
NCKAP5L
NCLN
NCOA4
NCOR1
NCR3LG1
NDC1
NDC80
NDE1
NDEL1
NDFIP2
NDNL2
NDST2
NDUFA12
NDUFA4L2
NDUFA5
NDUFAF1
NDUFB1
NDUFB10
NDUFB3
NDUFC2
NDUFS3
NDUFV1
NECAP2
NEDD1
NEDD4
NEGR1
NEK1
NEK2
NEK3
NEK8
NEK9
NENF
NET1
NETO2
NEU1
NEURL1
NFAT5
NFATC2IP
NFE2L1
NFE2L2
NFKB2
NFKBIA
NFYB
NFYC
NGDN
NGRN
NHLRC2
NHLRC3
NIF3L1
NIN
NIP7
NIPA1
NIPA2
NIT1
NLN
NLRP14
NMB
NME3
NMRAL1
NNT
NOB1
NOC2L
NOC3L
NOC4L
NOL8
NOL9
NOLC1
NONO
NOP58
NOP9
NOTCH2NL
NPAT
NPC2
NPHP4
NPM1
NQO1
NR1H3
NR2C1
NR2F2
NRAS
NRBF2
NRGN
NRXN2
NRXN3
NSD1
NSL1
NSMCE4A
NSUN6
NT5C2
NT5M
NTAN1
NTHL1
NTRK1
NUBP1
NUBP2
NUCB2
NUCKS1
NUDC
NUDT15
NUDT16L1
NUDT17
NUDT2
NUDT21
NUDT22
NUDT4
NUDT4P1
NUDT7
NUDT8
NUF2
NUMA1
NUMB
NUP107
NUP133
NUP153
NUP155
NUP160
NUP205
NUP35
NUP37
NUP85
NUP88
NUP93
NUP98
NUPL1
NUSAP1
NUTF2
NVL
NXF1
NXN
OAS3
OAZ2
ODF2L
OGDHL
OGFOD2
OGT
OIP5
OLFML2B
OPN3
OPTN
ORAI1
ORAOV1
ORC1
ORC6
ORMDL2
OSBP
OSBPL8
OSCP1
OSGEP
OTUB2
OTUD3
OTUD6B
OTUD7B
OVCA2
OXA1L
P2RX4
P3H1
PA2G4
PAAF1
PABPC4
PABPN1
PACS1
PACS2
PAFAH1B1
PAFAH1B2
PAGR1
PALB2
PALMD
PAM16
PAN2
PANK1
PANK2
PANK4
PANX1
PAPD4
PAPD5
PAPOLA
PAQR4
PAQR8
PARD6A
PARK7
PARN
PARP1
PARP16
PARP2
PARP4
PARP6
PARPBP
PARS2
PATL1
PAWR
PAX5
PBK
PBLD
PC
PCBP2
PCCA
PCGF5
PCGF6
PCID2
PCK2
PCNA
PCNX
PCNXL2
PCNXL4
PCP4L1
PCSK7
PDCD7
PDDC1
PDE4DIP
PDE8A
PDF
PDHX
PDIA3
PDIK1L
PDLIM1
PDS5A
PDS5B
[truncated: 1,338 more rows]

[truncated: 1 more sheets: GATA1 Target Gene]
